# Supplementary material for: Proteome and Transcriptome Analysis of Gonads Reveals Intersex in Gigantidas Haimaensis
Source: Research Square preprint supplement (doi:10.21203/rs.3.rs-1022235/v1), 2021-11-03
Supplement: Supplementary file 1 [file e4c93b4e996119ccb9898452.xls]

Gene_id	Tran_id	Prot_id	Protein(log2fc)	Protein(pval)	Tran(log2fc)	Tran(pval)
Cluster-4389.79	Cluster-4389.79	Cluster-4389.79;orf1	0.542635932	3.25E-05	1.8647	0.089371
Cluster-4389.4900	Cluster-4389.4900	Cluster-4389.4900;orf1	0.799092241	4.00E-05	0.93367	0.29154
Cluster-10601.0	Cluster-10601.0	Cluster-10601.0;orf1	-0.913922061	4.81E-05	-0.16291	0.94425
Cluster-4389.6508	Cluster-4389.6508	Cluster-4389.6508;orf1	2.38581922	5.57E-05	8.1198	3.52E-10
Cluster-11189.0	Cluster-11189.0	Cluster-11189.0;orf1	0.770234741	6.46E-05	1.2135	0.56839
Cluster-12981.0	Cluster-12981.0	Cluster-12981.0;	-0.274900368	9.54E-05	-0.12276	0.96893
Cluster-12886.1	Cluster-12886.1	Cluster-12886.1;	-0.826409541	0.000123842	-0.40743	0.66766
Cluster-4389.622	Cluster-4389.622	Cluster-4389.622;orf1	-0.410134159	0.000124124	2.2101	0.29768
Cluster-4389.4645	Cluster-4389.4645	Cluster-4389.4645;orf1	0.736645519	0.000125038	1.2131	0.096102
Cluster-9577.0	Cluster-9577.0	Cluster-9577.0;orf1	-0.302602076	0.00013599	0.36527	0.80604
Cluster-12619.0	Cluster-12619.0	Cluster-12619.0;orf1	0.611419052	0.000147584	0.062904	0.97662
Cluster-19283.0	Cluster-19283.0	Cluster-19283.0;orf1	-0.696492686	0.0001908	0.094478	0.92092
Cluster-19650.0	Cluster-19650.0	Cluster-19650.0;orf1	0.517187784	0.000192426	3.7192	0.00020151
Cluster-4389.6264	Cluster-4389.6264	Cluster-4389.6264;orf1	0.738186637	0.000204972	1.964	0.0077431
Cluster-19771.0	Cluster-19771.0	Cluster-19771.0;orf1	-1.003604397	0.000227115	-4.3334	0.058437
Cluster-6699.0	Cluster-6699.0	Cluster-6699.0;orf1	-1.022895743	0.000244932	-3.1577	0.019198
Cluster-4389.6795	Cluster-4389.6795	Cluster-4389.6795;orf1	-0.856833413	0.000256685	-0.045978	0.94689
Cluster-3386.0	Cluster-3386.0	Cluster-3386.0;orf1	0.908904091	0.000266778	6.3759	0.00010124
Cluster-4389.2602	Cluster-4389.2602	Cluster-4389.2602;orf1	0.468304268	0.000271697	0.5652	0.45466
Cluster-8332.0	Cluster-8332.0	Cluster-8332.0;orf1	1.633293751	0.00029445	2.0258	0.60247
Cluster-4389.13487	Cluster-4389.13487	Cluster-4389.13487;orf1	-0.898598389	0.000326652	-0.0070861	0.99331
Cluster-4389.6601	Cluster-4389.6601	Cluster-4389.6601;orf1	-0.332759815	0.000365287	2.1564	0.012076
Cluster-2920.1	Cluster-2920.1	Cluster-2920.1;orf1	0.401483653	0.000376065	2.8753	0.10409
Cluster-4389.4523	Cluster-4389.4523	Cluster-4389.4523;orf1	0.383962438	0.000380414	0.13615	0.89755
Cluster-13357.1	Cluster-13357.1	Cluster-13357.1;	0.895727121	0.000395242	-1.6333	0.60348
Cluster-4389.15996	Cluster-4389.15996	Cluster-4389.15996;orf1	2.875277059	0.000404918	-0.39106	0.83836
Cluster-19998.1	Cluster-19998.1	Cluster-19998.1;	0.56494474	0.000424613	0.78075	0.723
Cluster-18230.1	Cluster-18230.1	Cluster-18230.1;orf1	0.381561199	0.000425097	-0.50764	0.46343
Cluster-4389.8953	Cluster-4389.8953	Cluster-4389.8953;orf1	0.994359378	0.000433509	-0.097801	0.89795
Cluster-4389.14164	Cluster-4389.14164	Cluster-4389.14164;orf1	0.638271834	0.000440372	0.66206	0.62083
Cluster-4389.8737	Cluster-4389.8737	Cluster-4389.8737;orf1	0.312615167	0.000440823	0.47792	0.61208
Cluster-5473.0	Cluster-5473.0	Cluster-5473.0;orf1	0.376357031	0.000444246	1.7187	0.63132
Cluster-6854.0	Cluster-6854.0	Cluster-6854.0;orf1	0.276027244	0.000447153	-0.52727	0.7627
Cluster-4389.2104	Cluster-4389.2104	Cluster-4389.2104;orf1	-0.55889372	0.00047115	0.78411	0.84309
Cluster-4389.15631	Cluster-4389.15631	Cluster-4389.15631;orf1	0.66826458	0.00047162	-0.38673	0.70689
Cluster-4389.12953	Cluster-4389.12953	Cluster-4389.12953;orf1	0.498751031	0.000488541	1.1033	0.088296
Cluster-17943.0	Cluster-17943.0	Cluster-17943.0;orf1	-0.709302338	0.000502486	-1.8864	0.21172
Cluster-4389.16891	Cluster-4389.16891	Cluster-4389.16891;orf1	0.438442172	0.000527199	0.76123	0.27021
Cluster-9223.0	Cluster-9223.0	Cluster-9223.0;	-0.994321209	0.000532658	-2.3514	0.29847
Cluster-8039.0	Cluster-8039.0	Cluster-8039.0;orf1	-0.885043893	0.000542119	-1.6058	0.36803
Cluster-19168.0	Cluster-19168.0	Cluster-19168.0;orf1	-1.024596909	0.000583065	-2.0963	0.022365
Cluster-20407.0	Cluster-20407.0	Cluster-20407.0;orf1	0.960045948	0.000603229	1.2331	0.17861
Cluster-4389.4482	Cluster-4389.4482	Cluster-4389.4482;orf1	-1.123183127	0.000630923	-2.3001	0.06055
Cluster-20446.0	Cluster-20446.0	Cluster-20446.0;orf1	0.503606126	0.000667621	1.3426	0.63428
Cluster-7331.0	Cluster-7331.0	Cluster-7331.0;	-0.460684937	0.000669748	-0.47306	0.85145
Cluster-9096.0	Cluster-9096.0	Cluster-9096.0;orf1	0.37841739	0.000721548	1.8208	0.27078
Cluster-4389.10769	Cluster-4389.10769	Cluster-4389.10769;orf1	-1.008480314	0.00076545	-0.48486	0.54956
Cluster-16140.0	Cluster-16140.0	Cluster-16140.0;orf1	-0.653375954	0.000778416	-4.3136	0.04723
Cluster-21598.0	Cluster-21598.0	Cluster-21598.0;orf1	0.4710859	0.000784339	-0.14491	0.83102
Cluster-9561.0	Cluster-9561.0	Cluster-9561.0;	-0.634014945	0.000810788	-5.8096	0.010456
Cluster-10404.0	Cluster-10404.0	Cluster-10404.0;orf1	0.300011766	0.000835243	-3.5621	0.047683
Cluster-4389.937	Cluster-4389.937	Cluster-4389.937;orf1	0.636023349	0.000841716	1.1564	0.68435
Cluster-14877.0	Cluster-14877.0	Cluster-14877.0;orf1	-0.793739138	0.000854626	-3.217	0.15665
Cluster-4389.6613	Cluster-4389.6613	Cluster-4389.6613;orf1	0.386826576	0.00086565	0.86037	0.22336
Cluster-4389.7933	Cluster-4389.7933	Cluster-4389.7933;orf1	-1.667499795	0.000878022	-2.7442	0.015002
Cluster-20894.0	Cluster-20894.0	Cluster-20894.0;orf1	-0.75169297	0.000890373	-1.2512	0.18546
Cluster-16392.0	Cluster-16392.0	Cluster-16392.0;orf1	-0.640302733	0.001020897	-0.22715	0.71048
Cluster-4389.11832	Cluster-4389.11832	Cluster-4389.11832;orf1	-0.781573231	0.00104185	1.0913	0.077328
Cluster-15409.0	Cluster-15409.0	Cluster-15409.0;orf1	-1.551369364	0.001044723	-1.5552	0.019781
Cluster-19389.1	Cluster-19389.1	Cluster-19389.1;	1.60379761	0.001066434	-1.1744	0.28445
Cluster-16215.0	Cluster-16215.0	Cluster-16215.0;orf1	-0.717948368	0.001109104	-1.4891	0.19184
Cluster-4389.10163	Cluster-4389.10163	Cluster-4389.10163;orf1	0.956132554	0.001112761	-0.088805	0.91047
Cluster-4389.6053	Cluster-4389.6053	Cluster-4389.6053;orf1	0.80928302	0.001117239	0.74387	0.26509
Cluster-4389.16439	Cluster-4389.16439	Cluster-4389.16439;	-1.398615456	0.00111786	-1.7249	0.33368
Cluster-4389.782	Cluster-4389.782	Cluster-4389.782;orf1	0.404759278	0.001122685	-0.52391	0.57011
Cluster-4389.5080	Cluster-4389.5080	Cluster-4389.5080;orf1	0.875982306	0.001125226	4.6308	4.88E-05
Cluster-4389.13154	Cluster-4389.13154	Cluster-4389.13154;	0.525745684	0.001125902	3.1716	0.20416
Cluster-4389.8726	Cluster-4389.8726	Cluster-4389.8726;orf1	0.842878169	0.001195312	1.1014	0.24389
Cluster-4389.4214	Cluster-4389.4214	Cluster-4389.4214;	0.442066838	0.001214226	2.8926	0.021495
Cluster-4389.5435	Cluster-4389.5435	Cluster-4389.5435;orf1	-0.356231192	0.001215429	1.4515	0.14087
Cluster-17523.0	Cluster-17523.0	Cluster-17523.0;	0.702604111	0.00128551	-3.077	0.0012778
Cluster-18509.1	Cluster-18509.1	Cluster-18509.1;orf1	2.054207074	0.00130056	4.622	4.45E-06
Cluster-10079.0	Cluster-10079.0	Cluster-10079.0;orf1	0.45764696	0.001327329	1.0195	0.36208
Cluster-4389.10639	Cluster-4389.10639	Cluster-4389.10639;orf1	1.132464986	0.001341657	4.0178	0.00021039
Cluster-16753.0	Cluster-16753.0	Cluster-16753.0;orf1	-0.293181836	0.001345743	-0.6305	0.51146
Cluster-4389.6228	Cluster-4389.6228	Cluster-4389.6228;orf1	0.408937315	0.001352263	0.080739	0.9023
Cluster-16126.0	Cluster-16126.0	Cluster-16126.0;orf1	0.497366383	0.001377492	-0.036231	0.95812
Cluster-4389.6078	Cluster-4389.6078	Cluster-4389.6078;	-0.567155552	0.001379933	0.085147	0.89655
Cluster-21422.0	Cluster-21422.0	Cluster-21422.0;orf1	0.352229447	0.00138716	-0.28396	0.78828
Cluster-4389.2838	Cluster-4389.2838	Cluster-4389.2838;orf1	0.562400551	0.001394314	1.0632	0.17999
Cluster-4389.2303	Cluster-4389.2303	Cluster-4389.2303;	1.588808275	0.001418038	0.80279	0.48275
Cluster-16229.0	Cluster-16229.0	Cluster-16229.0;orf2	1.066698765	0.001426972	2.9618	0.0032658
Cluster-4389.5497	Cluster-4389.5497	Cluster-4389.5497;orf1	0.267541475	0.001438516	-0.085083	0.9005
Cluster-4389.3665	Cluster-4389.3665	Cluster-4389.3665;orf1	0.986721405	0.001443838	1.6013	0.30863
Cluster-8584.0	Cluster-8584.0	Cluster-8584.0;orf1	0.670136958	0.001454579	-0.97825	0.80429
Cluster-19311.0	Cluster-19311.0	Cluster-19311.0;orf1	0.461892649	0.001456002	-1.5621	0.070346
Cluster-4389.2963	Cluster-4389.2963	Cluster-4389.2963;orf1	0.391442255	0.001473686	-0.313	0.63685
Cluster-4389.3102	Cluster-4389.3102	Cluster-4389.3102;orf1	-0.992084863	0.001483533	-1.5077	0.12297
Cluster-4260.1	Cluster-4260.1	Cluster-4260.1;	0.465476567	0.001514893	0.16554	0.83685
Cluster-4389.3148	Cluster-4389.3148	Cluster-4389.3148;orf1	0.594743522	0.001517955	1.3675	0.10033
Cluster-4389.371	Cluster-4389.371	Cluster-4389.371;orf1	0.732023013	0.00151923	0.59081	0.56332
Cluster-18228.0	Cluster-18228.0	Cluster-18228.0;orf1	0.488597618	0.0015284	1.1107	0.15825
Cluster-8264.0	Cluster-8264.0	Cluster-8264.0;orf1	1.019023477	0.001557108	-0.77138	0.83739
Cluster-4389.6736	Cluster-4389.6736	Cluster-4389.6736;orf1	-0.453344749	0.001562659	-1.4056	0.092184
Cluster-16044.0	Cluster-16044.0	Cluster-16044.0;	-0.393005633	0.001582626	-1.0987	0.22995
Cluster-1109.1	Cluster-1109.1	Cluster-1109.1;orf1	1.55437093	0.001585883	2.5623	0.45685
Cluster-4389.1271	Cluster-4389.1271	Cluster-4389.1271;orf1	-0.38670513	0.001637234	-0.51815	0.6518
Cluster-4389.2783	Cluster-4389.2783	Cluster-4389.2783;orf1	1.463366326	0.001652614	-0.87378	0.48591
Cluster-1402.0	Cluster-1402.0	Cluster-1402.0;orf1	0.614440374	0.001659781	0.78411	0.84309
Cluster-15994.2	Cluster-15994.2	Cluster-15994.2;orf1	0.461405618	0.001692628	4.9348	1.65E-07
Cluster-4389.6091	Cluster-4389.6091	Cluster-4389.6091;	0.586912142	0.001724678	1.579	0.11135
Cluster-17789.2	Cluster-17789.2	Cluster-17789.2;orf1	-0.568280581	0.001740378	-1.3418	0.52055
Cluster-21241.1	Cluster-21241.1	Cluster-21241.1;orf1	0.449216835	0.001759629	-1.6813	0.11892
Cluster-17395.0	Cluster-17395.0	Cluster-17395.0;orf1	-0.707129177	0.00176879	-4.081	0.0024431
Cluster-4389.9733	Cluster-4389.9733	Cluster-4389.9733;orf1	-0.42755942	0.001838615	0.62154	0.59079
Cluster-7233.0	Cluster-7233.0	Cluster-7233.0;orf1	-0.793867024	0.00184085	-4.521	0.022807
Cluster-17107.0	Cluster-17107.0	Cluster-17107.0;orf1	-0.638766853	0.001849955	0.22753	0.76564
Cluster-4389.5320	Cluster-4389.5320	Cluster-4389.5320;orf1	0.488557471	0.001853559	-0.080121	0.90753
Cluster-4389.6141	Cluster-4389.6141	Cluster-4389.6141;orf1	-0.810884371	0.001862532	0.29482	0.66476
Cluster-4389.6662	Cluster-4389.6662	Cluster-4389.6662;orf1	0.862255923	0.001918722	2.8889	0.0046837
Cluster-15677.0	Cluster-15677.0	Cluster-15677.0;orf1	-0.120887241	0.00193462	0.29098	0.75526
Cluster-4389.7053	Cluster-4389.7053	Cluster-4389.7053;orf1	-0.40945692	0.001958725	-0.43097	0.68653
Cluster-4389.15909	Cluster-4389.15909	Cluster-4389.15909;orf2	1.232046761	0.001984988	2.0447	0.079491
Cluster-18005.0	Cluster-18005.0	Cluster-18005.0;	0.822701853	0.001987394	-2.2417	0.16231
Cluster-15838.0	Cluster-15838.0	Cluster-15838.0;orf1	1.09696173	0.001988811	-2.9135	0.17226
Cluster-4389.1333	Cluster-4389.1333	Cluster-4389.1333;orf1	-0.886677051	0.002023943	-1.1842	0.67229
Cluster-4389.9870	Cluster-4389.9870	Cluster-4389.9870;orf1	0.940760797	0.002078239	-0.40703	0.59437
Cluster-21223.0	Cluster-21223.0	Cluster-21223.0;orf1	0.50397366	0.002119125	0.44147	0.66858
Cluster-4389.2222	Cluster-4389.2222	Cluster-4389.2222;orf1	0.760465838	0.002120114	1.1341	0.10506
Cluster-4389.12515	Cluster-4389.12515	Cluster-4389.12515;orf1	0.896537308	0.002133963	2.2631	0.13586
Cluster-4389.10936	Cluster-4389.10936	Cluster-4389.10936;orf1	0.548642714	0.002148865	2.1799	0.00041408
Cluster-4389.4440	Cluster-4389.4440	Cluster-4389.4440;orf1	0.585633774	0.002177833	-0.30607	0.70817
Cluster-4389.7987	Cluster-4389.7987	Cluster-4389.7987;orf1	0.518208543	0.002220511	1.0655	0.37101
Cluster-4389.13521	Cluster-4389.13521	Cluster-4389.13521;orf1	0.337271323	0.002232781	0.9665	0.22945
Cluster-4389.5986	Cluster-4389.5986	Cluster-4389.5986;orf1	0.55693797	0.00224862	-0.11724	0.89038
Cluster-4389.8341	Cluster-4389.8341	Cluster-4389.8341;orf1	-0.28818088	0.002256186	0.55613	0.41094
Cluster-4389.2294	Cluster-4389.2294	Cluster-4389.2294;orf1	0.473609709	0.002260484	2.4501	0.01095
Cluster-17710.0	Cluster-17710.0	Cluster-17710.0;	-0.797926098	0.00226373	-1.8889	0.023641
Cluster-4389.953	Cluster-4389.953	Cluster-4389.953;orf1	0.587494508	0.002335471	0.78147	0.69934
Cluster-21656.0	Cluster-21656.0	Cluster-21656.0;	0.483478555	0.002365999	1.022	0.24184
Cluster-4389.6203	Cluster-4389.6203	Cluster-4389.6203;orf1	1.067127156	0.002369784	1.0195	0.35963
Cluster-17811.1	Cluster-17811.1	Cluster-17811.1;orf1	-0.830920235	0.002370135	-4.1168	0.21331
Cluster-4621.0	Cluster-4621.0	Cluster-4621.0;	-1.023788794	0.002370215	1.8416	0.63965
Cluster-4389.10988	Cluster-4389.10988	Cluster-4389.10988;orf1	-0.730133847	0.002421866	-0.71502	0.42124
Cluster-4389.2170	Cluster-4389.2170	Cluster-4389.2170;orf1	0.994395451	0.002486893	1.5732	0.34625
Cluster-15744.0	Cluster-15744.0	Cluster-15744.0;orf1	-0.212654013	0.002489641	-0.067895	0.93633
Cluster-4389.3284	Cluster-4389.3284	Cluster-4389.3284;orf1	1.36843615	0.002511074	3.9936	0.074067
Cluster-18557.0	Cluster-18557.0	Cluster-18557.0;orf1	0.69160016	0.002548739	0.10289	0.89513
Cluster-16565.0	Cluster-16565.0	Cluster-16565.0;orf1	-0.435893845	0.002555425	-0.099265	0.93818
Cluster-4389.982	Cluster-4389.982	Cluster-4389.982;orf1	0.623404012	0.002578743	-0.30536	0.74002
Cluster-3501.0	Cluster-3501.0	Cluster-3501.0;	-0.607118232	0.002631807	1.3685	0.72857
Cluster-12982.3	Cluster-12982.3	Cluster-12982.3;orf1	0.829390705	0.002652582	1.1282	0.36668
Cluster-3768.0	Cluster-3768.0	Cluster-3768.0;orf1	1.520715209	0.002698995	7.7316	1.74E-07
Cluster-7128.0	Cluster-7128.0	Cluster-7128.0;orf1	-0.343726448	0.002715167	0.54282	0.67595
Cluster-4389.10838	Cluster-4389.10838	Cluster-4389.10838;orf1	0.316151581	0.002727411	0.64573	0.60611
Cluster-21309.0	Cluster-21309.0	Cluster-21309.0;orf1	-0.457774482	0.002745607	0.65644	0.54221
Cluster-18158.0	Cluster-18158.0	Cluster-18158.0;orf1	0.334945096	0.002759605	0.7249	0.30711
Cluster-4389.12025	Cluster-4389.12025	Cluster-4389.12025;orf1	1.146152897	0.002780729	6.5599	3.32E-07
Cluster-15585.0	Cluster-15585.0	Cluster-15585.0;orf2	0.516384128	0.002792748	-0.13484	0.91845
Cluster-4389.10995	Cluster-4389.10995	Cluster-4389.10995;orf1	1.113879382	0.002793507	10.291	1.08E-11
Cluster-4389.9807	Cluster-4389.9807	Cluster-4389.9807;	0.297565467	0.002798068	-0.26054	0.79603
Cluster-4389.6065	Cluster-4389.6065	Cluster-4389.6065;orf1	0.311728476	0.00281356	1.2063	0.099052
Cluster-4389.8786	Cluster-4389.8786	Cluster-4389.8786;orf1	0.955341759	0.002893085	-0.0458	0.95616
Cluster-4389.14340	Cluster-4389.14340	Cluster-4389.14340;orf1	0.42409878	0.00298759	1.2629	0.071975
Cluster-4389.1879	Cluster-4389.1879	Cluster-4389.1879;orf1	0.490718129	0.002997745	1.0431	0.32633
Cluster-17773.0	Cluster-17773.0	Cluster-17773.0;orf1	-0.523487997	0.003000979	0.25977	0.75417
Cluster-4389.5269	Cluster-4389.5269	Cluster-4389.5269;orf1	-0.765985397	0.003034485	-2.896	0.0035785
Cluster-4389.15645	Cluster-4389.15645	Cluster-4389.15645;orf1	0.736653008	0.003047677	-0.98584	0.79986
Cluster-4389.7515	Cluster-4389.7515	Cluster-4389.7515;orf1	-0.585230685	0.003049484	-1.1171	0.36199
Cluster-15703.1	Cluster-15703.1	Cluster-15703.1;orf1	-0.840583905	0.003072087	-3.4679	0.0063817
Cluster-4389.12131	Cluster-4389.12131	Cluster-4389.12131;orf1	-0.633804869	0.003083107	-0.63312	0.31407
Cluster-12884.0	Cluster-12884.0	Cluster-12884.0;orf1	-1.330823781	0.003118047	-6.8108	0.00017504
Cluster-4389.9170	Cluster-4389.9170	Cluster-4389.9170;orf1	1.442316809	0.003156636	-1.2048	0.17211
Cluster-17921.0	Cluster-17921.0	Cluster-17921.0;orf1	-0.929057654	0.003174216	-1.9159	NA
Cluster-4389.2926	Cluster-4389.2926	Cluster-4389.2926;orf1	0.552771959	0.003182776	1.0274	0.23886
Cluster-18458.0	Cluster-18458.0	Cluster-18458.0;orf1	0.61402922	0.003196793	-0.8804	0.54757
Cluster-4389.11862	Cluster-4389.11862	Cluster-4389.11862;orf1	0.285086122	0.003198881	1.8337	0.0098397
Cluster-4389.422	Cluster-4389.422	Cluster-4389.422;orf1	-0.569658371	0.003207638	-0.29647	0.79429
Cluster-4389.2416	Cluster-4389.2416	Cluster-4389.2416;	1.094020694	0.003225378	2.4348	0.00095266
Cluster-4757.0	Cluster-4757.0	Cluster-4757.0;orf1	-0.729397792	0.003228114	-1.3529	0.73817
Cluster-4389.9662	Cluster-4389.9662	Cluster-4389.9662;orf1	-0.740408029	0.003229086	0.22285	0.84724
Cluster-4389.13517	Cluster-4389.13517	Cluster-4389.13517;orf1	1.521657404	0.003252094	4.0578	7.74E-05
Cluster-4389.4575	Cluster-4389.4575	Cluster-4389.4575;orf1	0.595317435	0.003266899	-1.1509	0.49122
Cluster-15084.0	Cluster-15084.0	Cluster-15084.0;orf1	0.71701054	0.00328131	0.23184	0.69778
Cluster-4389.8438	Cluster-4389.8438	Cluster-4389.8438;orf1	-0.237351708	0.003297261	0.083395	0.898
Cluster-14129.0	Cluster-14129.0	Cluster-14129.0;orf1	-1.187866429	0.003302725	-0.85371	0.71885
Cluster-4389.12629	Cluster-4389.12629	Cluster-4389.12629;orf1	0.711966807	0.003316743	1.3147	0.048866
Cluster-21929.0	Cluster-21929.0	Cluster-21929.0;orf1	-1.111701233	0.003402639	-3.0485	0.00018027
Cluster-19805.0	Cluster-19805.0	Cluster-19805.0;orf1	-1.065702078	0.003428801	0.18577	0.8418
Cluster-8783.0	Cluster-8783.0	Cluster-8783.0;orf1	0.725258838	0.003448818	0.017731	0.98873
Cluster-4389.16790	Cluster-4389.16790	Cluster-4389.16790;orf1	0.504400861	0.003466631	-1.9024	0.19557
Cluster-19064.0	Cluster-19064.0	Cluster-19064.0;orf1	0.515878866	0.003466651	-0.24666	0.75825
Cluster-19916.0	Cluster-19916.0	Cluster-19916.0;	0.443871145	0.003472176	-1.0065	0.21932
Cluster-9417.0	Cluster-9417.0	Cluster-9417.0;orf1	0.352577723	0.003480947	0.83317	0.53566
Cluster-7218.0	Cluster-7218.0	Cluster-7218.0;	-0.382479893	0.003525641	-1.7147	0.57446
Cluster-9260.0	Cluster-9260.0	Cluster-9260.0;orf2	-0.899754953	0.003589693	-5.4332	0.0015422
Cluster-11799.0	Cluster-11799.0	Cluster-11799.0;	-0.404027438	0.003591469	-1.2934	0.74282
Cluster-10023.0	Cluster-10023.0	Cluster-10023.0;orf1	-0.802862346	0.003596157	-4.9587	0.10731
Cluster-12146.0	Cluster-12146.0	Cluster-12146.0;orf1	0.399600738	0.003621385	-3.5854	0.079287
Cluster-4389.9922	Cluster-4389.9922	Cluster-4389.9922;orf1	1.131964082	0.003633765	2.8685	0.00020556
Cluster-4389.5550	Cluster-4389.5550	Cluster-4389.5550;orf1	0.41518543	0.00366057	-0.23247	0.86058
Cluster-9537.0	Cluster-9537.0	Cluster-9537.0;orf1	-0.857333264	0.003664721	-3.8805	0.1135
Cluster-6400.0	Cluster-6400.0	Cluster-6400.0;orf1	-0.867890083	0.003677252	1.8436	0.21901
Cluster-4389.10626	Cluster-4389.10626	Cluster-4389.10626;orf1	0.647153424	0.003678311	-0.24686	0.74545
Cluster-14623.0	Cluster-14623.0	Cluster-14623.0;orf2	-1.089826463	0.003703788	-1.5297	0.42316
Cluster-21850.1	Cluster-21850.1	Cluster-21850.1;	0.652729057	0.00371012	-0.20886	0.94687
Cluster-4389.16170	Cluster-4389.16170	Cluster-4389.16170;	0.373044038	0.003761101	1.3598	0.11046
Cluster-13089.0	Cluster-13089.0	Cluster-13089.0;	0.428611434	0.003762177	-3.5269	0.31134
Cluster-4389.15150	Cluster-4389.15150	Cluster-4389.15150;orf1	0.48863217	0.003778385	-1.1417	0.4275
Cluster-5110.0	Cluster-5110.0	Cluster-5110.0;orf1	0.640235084	0.003792391	1.8076	0.6459
Cluster-4389.7282	Cluster-4389.7282	Cluster-4389.7282;orf1	0.677107272	0.003794043	0.61494	0.39379
Cluster-4389.15434	Cluster-4389.15434	Cluster-4389.15434;orf1	1.739789233	0.003801499	3.2952	0.0046467
Cluster-15318.0	Cluster-15318.0	Cluster-15318.0;orf1	-0.8455253	0.003802871	-2.0983	0.12376
Cluster-17520.0	Cluster-17520.0	Cluster-17520.0;orf1	0.369080752	0.003803167	0.85429	0.42549
Cluster-4389.13016	Cluster-4389.13016	Cluster-4389.13016;orf1	1.147590365	0.003843185	3.0519	0.00051909
Cluster-4389.977	Cluster-4389.977	Cluster-4389.977;orf1	0.274786928	0.003889486	-1.07	0.66422
Cluster-4389.15705	Cluster-4389.15705	Cluster-4389.15705;orf1	1.594841219	0.003890363	2.9862	0.014124
Cluster-4389.10946	Cluster-4389.10946	Cluster-4389.10946;orf1	0.394706648	0.003934783	1.3975	0.065634
Cluster-14158.1	Cluster-14158.1	Cluster-14158.1;orf1	0.307876016	0.003952953	0.33702	0.67867
Cluster-10060.0	Cluster-10060.0	Cluster-10060.0;orf1	-1.327777171	0.003958357	1.6915	0.40612
Cluster-8432.1	Cluster-8432.1	Cluster-8432.1;orf1	0.442131554	0.003969086	-1.2408	0.58567
Cluster-4389.7457	Cluster-4389.7457	Cluster-4389.7457;orf1	-0.791602889	0.003995515	-1.6128	0.016941
Cluster-17209.0	Cluster-17209.0	Cluster-17209.0;orf1	-0.766348387	0.004010584	-1.644	0.020316
Cluster-17074.0	Cluster-17074.0	Cluster-17074.0;orf1	0.456967829	0.004018161	-0.2725	0.72107
Cluster-16302.0	Cluster-16302.0	Cluster-16302.0;	0.737819639	0.004027571	1.5534	0.026325
Cluster-15854.0	Cluster-15854.0	Cluster-15854.0;orf1	0.510403548	0.004045561	0.78442	0.45711
Cluster-4389.3505	Cluster-4389.3505	Cluster-4389.3505;orf1	0.978717667	0.00406264	0.70744	0.46469
Cluster-4389.1922	Cluster-4389.1922	Cluster-4389.1922;orf1	-0.629493661	0.004096526	-2.8003	0.4358
Cluster-4389.12843	Cluster-4389.12843	Cluster-4389.12843;orf1	1.032376002	0.004134761	2.4406	0.014536
Cluster-4389.3730	Cluster-4389.3730	Cluster-4389.3730;orf1	0.295061141	0.004174183	0.38228	0.55257
Cluster-8193.0	Cluster-8193.0	Cluster-8193.0;orf1	-0.737738173	0.004176239	0.46821	0.76308
Cluster-4389.2925	Cluster-4389.2925	Cluster-4389.2925;orf1	-0.822226213	0.004197806	0.93357	0.74306
Cluster-15816.0	Cluster-15816.0	Cluster-15816.0;orf1	1.23781955	0.00423461	0.34063	0.59513
Cluster-16851.0	Cluster-16851.0	Cluster-16851.0;orf1	-0.326653796	0.004244469	-0.64944	0.53113
Cluster-18449.0	Cluster-18449.0	Cluster-18449.0;	0.891764439	0.004249701	-1.0389	0.60688
Cluster-4389.753	Cluster-4389.753	Cluster-4389.753;orf1	-0.477374726	0.004323673	0.31211	0.82379
Cluster-4389.10148	Cluster-4389.10148	Cluster-4389.10148;orf1	1.289541288	0.004342344	2.4038	0.001128
Cluster-4389.5369	Cluster-4389.5369	Cluster-4389.5369;orf1	-0.295829669	0.004360075	-0.9539	0.43613
Cluster-16179.0	Cluster-16179.0	Cluster-16179.0;orf1	0.812156459	0.004361594	0.53885	0.56846
Cluster-4389.4990	Cluster-4389.4990	Cluster-4389.4990;orf1	1.57455904	0.004367147	1.9972	0.011148
Cluster-4389.8443	Cluster-4389.8443	Cluster-4389.8443;orf1	0.456386797	0.004372189	0.23484	0.70747
Cluster-6852.0	Cluster-6852.0	Cluster-6852.0;orf1	-0.641917797	0.004408684	0.13374	0.97287
Cluster-4389.9856	Cluster-4389.9856	Cluster-4389.9856;orf1	0.88798636	0.004415612	-0.4408	0.65313
Cluster-4389.7700	Cluster-4389.7700	Cluster-4389.7700;orf1	-0.298236881	0.004420909	0.1308	0.88839
Cluster-4389.4883	Cluster-4389.4883	Cluster-4389.4883;orf1	0.420528258	0.004483648	2.9298	0.00065462
Cluster-4389.6573	Cluster-4389.6573	Cluster-4389.6573;orf1	0.176814037	0.004485419	2.6814	0.015322
Cluster-19193.0	Cluster-19193.0	Cluster-19193.0;orf1	1.232416321	0.004499717	3.3234	0.0023591
Cluster-4389.5942	Cluster-4389.5942	Cluster-4389.5942;orf1	1.068390724	0.004518171	2.8803	0.0034438
Cluster-20965.0	Cluster-20965.0	Cluster-20965.0;orf1	-0.915504454	0.004529062	-3.1249	0.016416
Cluster-4389.13102	Cluster-4389.13102	Cluster-4389.13102;orf1	-0.730575508	0.004541733	0.74749	0.28891
Cluster-4389.12815	Cluster-4389.12815	Cluster-4389.12815;orf1	-0.652476032	0.004612382	-1.6124	0.01815
Cluster-4389.11349	Cluster-4389.11349	Cluster-4389.11349;orf1	0.890150858	0.004639718	1.6678	0.027051
Cluster-4389.3742	Cluster-4389.3742	Cluster-4389.3742;orf1	0.478978537	0.004654648	-0.8281	0.74086
Cluster-4389.14938	Cluster-4389.14938	Cluster-4389.14938;orf1	0.377392449	0.00465906	-0.68556	0.27687
Cluster-4389.14698	Cluster-4389.14698	Cluster-4389.14698;orf1	-0.355344305	0.004661839	-0.55622	0.39938
Cluster-4389.8198	Cluster-4389.8198	Cluster-4389.8198;orf1	0.72738034	0.004673744	1.226	0.21707
Cluster-10220.0	Cluster-10220.0	Cluster-10220.0;	1.246535589	0.004685472	1.3339	0.36472
Cluster-4389.4857	Cluster-4389.4857	Cluster-4389.4857;orf1	-0.308923654	0.004757997	1.5318	0.18554
Cluster-13570.0	Cluster-13570.0	Cluster-13570.0;	-0.928653251	0.004762276	-5.056	0.018248
Cluster-18316.0	Cluster-18316.0	Cluster-18316.0;orf1	-0.874000786	0.004814182	-0.89238	0.28951
Cluster-4389.11864	Cluster-4389.11864	Cluster-4389.11864;	1.508351575	0.004829078	2.0481	0.28212
Cluster-21602.0	Cluster-21602.0	Cluster-21602.0;orf1	-0.267118547	0.00486987	-0.56493	0.49123
Cluster-4389.1312	Cluster-4389.1312	Cluster-4389.1312;orf1	-0.267641326	0.004870431	-1.14	0.22701
Cluster-4389.7661	Cluster-4389.7661	Cluster-4389.7661;orf1	0.498259975	0.004886945	-0.099657	0.89871
Cluster-4389.13675	Cluster-4389.13675	Cluster-4389.13675;orf1	0.992417936	0.004894928	2.7914	0.070399
Cluster-9780.0	Cluster-9780.0	Cluster-9780.0;orf1	0.675220165	0.004924886	-0.88407	0.72588
Cluster-21364.0	Cluster-21364.0	Cluster-21364.0;	0.821753467	0.004977625	0.47345	0.60408
Cluster-4389.6756	Cluster-4389.6756	Cluster-4389.6756;orf1	-0.345223365	0.005002482	1.8512	0.099217
Cluster-4389.10225	Cluster-4389.10225	Cluster-4389.10225;orf1	-0.593389961	0.005048336	-1.0065	0.21211
Cluster-4389.12181	Cluster-4389.12181	Cluster-4389.12181;	0.623532337	0.005051761	-0.56944	0.60759
Cluster-9719.0	Cluster-9719.0	Cluster-9719.0;	-0.676926859	0.00505256	-3.1537	0.26887
Cluster-4389.10761	Cluster-4389.10761	Cluster-4389.10761;orf1	1.036016472	0.005084602	2.3645	0.033476
Cluster-17741.0	Cluster-17741.0	Cluster-17741.0;orf1	0.905098471	0.005148579	0.79337	0.35139
Cluster-15931.0	Cluster-15931.0	Cluster-15931.0;	0.940118463	0.005184229	-2.3509	0.27026
Cluster-6426.0	Cluster-6426.0	Cluster-6426.0;orf1	-0.47754858	0.005227275	-0.94102	0.52986
Cluster-4389.11885	Cluster-4389.11885	Cluster-4389.11885;orf1	0.725057237	0.005228576	0.72965	0.45932
Cluster-14143.0	Cluster-14143.0	Cluster-14143.0;orf1	0.904084965	0.0052311	0.58022	0.79853
Cluster-4389.8989	Cluster-4389.8989	Cluster-4389.8989;orf1	0.980970247	0.005254231	2.9038	0.00053212
Cluster-4389.15442	Cluster-4389.15442	Cluster-4389.15442;orf1	0.607204351	0.005254871	-0.0025078	0.99842
Cluster-4389.1134	Cluster-4389.1134	Cluster-4389.1134;	1.37536648	0.005257191	2.7973	0.068945
Cluster-13226.0	Cluster-13226.0	Cluster-13226.0;orf1	0.486083306	0.005261415	-2.161	0.48501
Cluster-4389.12252	Cluster-4389.12252	Cluster-4389.12252;orf1	1.120118997	0.00526861	1.7729	0.023836
Cluster-8234.0	Cluster-8234.0	Cluster-8234.0;	0.666687173	0.00527307	-0.18415	0.95774
Cluster-5848.0	Cluster-5848.0	Cluster-5848.0;	1.779907521	0.00531044	-2.3687	0.3101
Cluster-4520.0	Cluster-4520.0	Cluster-4520.0;orf1	0.60153911	0.005333216	5.4391	0.0021495
Cluster-18029.0	Cluster-18029.0	Cluster-18029.0;orf1	-0.51542869	0.005336392	2.9155	0.0055888
Cluster-14036.1	Cluster-14036.1	Cluster-14036.1;orf1	-0.993270651	0.005341029	-3.6577	0.32277
Cluster-4389.12968	Cluster-4389.12968	Cluster-4389.12968;orf1	1.351551794	0.00535024	1.8414	0.084347
Cluster-6527.0	Cluster-6527.0	Cluster-6527.0;	0.364926357	0.00537899	-2.5781	0.27992
Cluster-4389.16465	Cluster-4389.16465	Cluster-4389.16465;orf1	0.346723002	0.005474971	0.66896	0.83013
Cluster-4389.11462	Cluster-4389.11462	Cluster-4389.11462;orf1	1.168111029	0.005482712	1.5551	0.043224
Cluster-17713.0	Cluster-17713.0	Cluster-17713.0;orf1	-0.412537594	0.005548992	-0.97354	0.38867
Cluster-4389.15820	Cluster-4389.15820	Cluster-4389.15820;orf1	0.269257425	0.005549321	0.71479	0.27943
Cluster-7253.0	Cluster-7253.0	Cluster-7253.0;orf1	0.978455073	0.005555741	0.70287	0.85759
Cluster-4389.11318	Cluster-4389.11318	Cluster-4389.11318;orf1	0.853878157	0.005575902	1.6843	0.045626
Cluster-18565.0	Cluster-18565.0	Cluster-18565.0;orf1	0.835073941	0.005587808	-0.44916	0.61273
Cluster-4389.5433	Cluster-4389.5433	Cluster-4389.5433;orf1	-0.699531818	0.005609467	-0.44363	0.54577
Cluster-4389.12014	Cluster-4389.12014	Cluster-4389.12014;orf1	0.82887768	0.005625891	-1.5083	0.066556
Cluster-18619.0	Cluster-18619.0	Cluster-18619.0;orf1	0.923885131	0.005627033	2.9796	7.49E-05
Cluster-4951.0	Cluster-4951.0	Cluster-4951.0;orf1	0.657521282	0.005701409	2.7329	0.40741
Cluster-8704.0	Cluster-8704.0	Cluster-8704.0;orf1	-1.281198925	0.005705544	-2.4134	0.13541
Cluster-4389.2094	Cluster-4389.2094	Cluster-4389.2094;orf1	0.434675643	0.005711984	-1.4686	0.088299
Cluster-6468.0	Cluster-6468.0	Cluster-6468.0;	-0.855072936	0.00571296	-2.5305	0.40381
Cluster-15944.0	Cluster-15944.0	Cluster-15944.0;orf1	-0.361863119	0.005715354	0.5965	0.65042
Cluster-4389.5806	Cluster-4389.5806	Cluster-4389.5806;orf1	0.531549468	0.005716325	0.3963	0.58245
Cluster-4389.10983	Cluster-4389.10983	Cluster-4389.10983;orf1	1.73149918	0.005729489	6.6254	1.61E-11
Cluster-4389.4822	Cluster-4389.4822	Cluster-4389.4822;orf1	0.325876613	0.005763811	0.71967	0.36351
Cluster-17891.0	Cluster-17891.0	Cluster-17891.0;orf1	0.144626447	0.005789848	-0.024812	0.97726
Cluster-12295.0	Cluster-12295.0	Cluster-12295.0;orf1	0.48851256	0.005791102	-5.1931	0.077406
Cluster-4389.5117	Cluster-4389.5117	Cluster-4389.5117;orf1	0.456197751	0.005826788	0.38515	0.53053
Cluster-17498.0	Cluster-17498.0	Cluster-17498.0;	-0.926331079	0.005953387	-3.6435	0.018325
Cluster-4389.11506	Cluster-4389.11506	Cluster-4389.11506;orf1	0.446219559	0.005956871	1.0729	0.40629
Cluster-4389.17056	Cluster-4389.17056	Cluster-4389.17056;orf1	-0.407991624	0.00598869	0.18744	0.85056
Cluster-4389.5216	Cluster-4389.5216	Cluster-4389.5216;orf1	0.451488897	0.006021358	-0.41299	0.61981
Cluster-4389.12019	Cluster-4389.12019	Cluster-4389.12019;orf1	-0.596054575	0.006075344	0.14634	0.84886
Cluster-4389.4106	Cluster-4389.4106	Cluster-4389.4106;orf1	0.534776744	0.006075346	-0.099165	0.92605
Cluster-4389.13426	Cluster-4389.13426	Cluster-4389.13426;orf1	0.412009807	0.006135197	-0.70723	0.3866
Cluster-19953.0	Cluster-19953.0	Cluster-19953.0;orf1	-1.140191113	0.006151221	-1.7082	0.19446
Cluster-4389.1929	Cluster-4389.1929	Cluster-4389.1929;orf1	0.761763693	0.006168658	-0.091949	0.94354
Cluster-4389.7582	Cluster-4389.7582	Cluster-4389.7582;orf1	1.820174309	0.006208431	2.7496	0.0083722
Cluster-4389.9141	Cluster-4389.9141	Cluster-4389.9141;	0.711066631	0.006215424	0.36164	0.61384
Cluster-4797.0	Cluster-4797.0	Cluster-4797.0;	1.336577516	0.006217018	9.1214	3.10E-10
Cluster-14053.0	Cluster-14053.0	Cluster-14053.0;	0.486230953	0.006233569	-1.6274	0.62569
Cluster-18454.0	Cluster-18454.0	Cluster-18454.0;orf1	0.603337483	0.006241746	0.10042	0.91163
Cluster-4389.7090	Cluster-4389.7090	Cluster-4389.7090;orf1	-1.611249176	0.006281926	-1.0985	0.07095
Cluster-7794.0	Cluster-7794.0	Cluster-7794.0;orf1	-0.886770713	0.006312858	-2.8094	0.29605
Cluster-12262.0	Cluster-12262.0	Cluster-12262.0;orf1	-0.748053462	0.006321152	-0.98752	0.60837
Cluster-4389.2132	Cluster-4389.2132	Cluster-4389.2132;orf1	-0.551215016	0.006324852	4.2952	0.038171
Cluster-15894.0	Cluster-15894.0	Cluster-15894.0;orf1	-0.364005474	0.006331697	-2.8833	0.37006
Cluster-4389.13998	Cluster-4389.13998	Cluster-4389.13998;orf1	0.341666092	0.006340816	0.91366	0.21235
Cluster-4389.11160	Cluster-4389.11160	Cluster-4389.11160;orf1	-0.645812221	0.006350679	-1.2509	0.38012
Cluster-4389.466	Cluster-4389.466	Cluster-4389.466;orf1	-1.112114328	0.006351046	0.82248	0.51846
Cluster-4389.10216	Cluster-4389.10216	Cluster-4389.10216;orf1	1.539189115	0.006353353	4.8951	1.14E-07
Cluster-4389.1489	Cluster-4389.1489	Cluster-4389.1489;orf1	0.861420203	0.006375623	0.97692	0.1467
Cluster-16419.0	Cluster-16419.0	Cluster-16419.0;orf1	0.357671631	0.006441053	1.6214	0.12022
Cluster-12171.0	Cluster-12171.0	Cluster-12171.0;	0.415796213	0.006459981	-0.89748	0.80819
Cluster-4389.14556	Cluster-4389.14556	Cluster-4389.14556;orf1	0.974719361	0.006480687	2.2058	0.017934
Cluster-14030.0	Cluster-14030.0	Cluster-14030.0;orf1	-0.515423245	0.006492363	0.20506	0.89617
Cluster-12030.1	Cluster-12030.1	Cluster-12030.1;orf1	0.863510466	0.006509174	-3.4216	0.39459
Cluster-10749.0	Cluster-10749.0	Cluster-10749.0;	0.877430667	0.006543868	-1.0744	0.70239
Cluster-4389.11985	Cluster-4389.11985	Cluster-4389.11985;orf1	1.413300329	0.006621625	2.1306	0.029989
Cluster-14322.1	Cluster-14322.1	Cluster-14322.1;orf1	1.953288098	0.00662478	2.4437	0.019656
Cluster-4389.12751	Cluster-4389.12751	Cluster-4389.12751;orf1	1.376350979	0.006636685	1.5909	0.023682
Cluster-16104.0	Cluster-16104.0	Cluster-16104.0;orf1	-0.844356513	0.006681078	-1.4602	0.041857
Cluster-3325.0	Cluster-3325.0	Cluster-3325.0;orf1	1.713720575	0.006706323	7.8352	8.23E-08
Cluster-10901.1	Cluster-10901.1	Cluster-10901.1;orf1	0.427646924	0.006797746	1.8161	0.092496
Cluster-7842.0	Cluster-7842.0	Cluster-7842.0;	-0.569768982	0.006828707	-1.6915	0.6651
Cluster-10083.0	Cluster-10083.0	Cluster-10083.0;orf1	-0.507260144	0.006837421	0.088886	0.93724
Cluster-4438.0	Cluster-4438.0	Cluster-4438.0;orf1	0.391828464	0.006866809	1.0821	0.78419
Cluster-6326.0	Cluster-6326.0	Cluster-6326.0;orf1	-0.549357914	0.006981818	-0.85403	0.60422
Cluster-4389.16260	Cluster-4389.16260	Cluster-4389.16260;orf1	-0.411934625	0.006988485	0.18173	0.83115
Cluster-19314.0	Cluster-19314.0	Cluster-19314.0;orf1	0.3448596	0.006992714	1.6629	0.048874
Cluster-15811.0	Cluster-15811.0	Cluster-15811.0;orf1	-1.190852948	0.007109569	-0.57576	0.6545
Cluster-4389.8655	Cluster-4389.8655	Cluster-4389.8655;	-2.010402212	0.007149776	-2.8113	0.30895
Cluster-4389.500	Cluster-4389.500	Cluster-4389.500;orf1	0.453875223	0.007154803	0.28602	0.80727
Cluster-19012.0	Cluster-19012.0	Cluster-19012.0;orf1	-0.774703224	0.007168927	-1.7625	0.021615
Cluster-15929.2	Cluster-15929.2	Cluster-15929.2;orf1	-0.866578332	0.007173437	0.31016	0.90598
Cluster-4389.2300	Cluster-4389.2300	Cluster-4389.2300;orf1	0.995052198	0.007202726	1.6581	0.081279
Cluster-12141.0	Cluster-12141.0	Cluster-12141.0;orf1	-0.852810311	0.00728155	-2.4881	0.15937
Cluster-17933.1	Cluster-17933.1	Cluster-17933.1;orf1	-0.994356592	0.007285156	0.53183	0.79841
Cluster-4389.10043	Cluster-4389.10043	Cluster-4389.10043;orf1	0.740869939	0.007291676	1.0992	0.1866
Cluster-15913.0	Cluster-15913.0	Cluster-15913.0;orf1	-0.429399938	0.007390281	-1.8486	0.056549
Cluster-4389.6562	Cluster-4389.6562	Cluster-4389.6562;orf1	0.419861103	0.007411223	0.42188	0.46864
Cluster-9951.0	Cluster-9951.0	Cluster-9951.0;	1.474494387	0.007413722	0.38765	0.9063
Cluster-4389.8617	Cluster-4389.8617	Cluster-4389.8617;orf1	0.315411281	0.007420257	0.18683	0.74923
Cluster-17860.0	Cluster-17860.0	Cluster-17860.0;orf1	0.429569717	0.007428799	0.81634	0.49831
Cluster-4389.5165	Cluster-4389.5165	Cluster-4389.5165;orf1	1.243967327	0.007439713	1.4036	0.22821
Cluster-9925.1	Cluster-9925.1	Cluster-9925.1;orf1	-0.441079633	0.007458153	-3.8538	0.075618
Cluster-20447.0	Cluster-20447.0	Cluster-20447.0;orf1	-0.382869177	0.007470762	-0.28191	0.65198
Cluster-17076.0	Cluster-17076.0	Cluster-17076.0;orf1	0.286750094	0.007492828	-1.7712	0.069225
Cluster-4389.15915	Cluster-4389.15915	Cluster-4389.15915;	0.926830977	0.007571969	2.4093	0.0010128
Cluster-4389.6729	Cluster-4389.6729	Cluster-4389.6729;orf1	0.36571705	0.007582427	-0.31807	0.69326
Cluster-4389.423	Cluster-4389.423	Cluster-4389.423;orf1	0.706062681	0.007584329	0.71506	0.28606
Cluster-4389.4677	Cluster-4389.4677	Cluster-4389.4677;orf1	-0.924785834	0.007603611	-0.75686	0.19014
Cluster-12116.1	Cluster-12116.1	Cluster-12116.1;orf1	0.279817049	0.007605931	1.8321	0.025721
Cluster-4389.3344	Cluster-4389.3344	Cluster-4389.3344;orf1	0.386150797	0.007696451	0.11768	0.88782
Cluster-4389.11903	Cluster-4389.11903	Cluster-4389.11903;orf2	0.820555745	0.007696571	-0.75739	0.32617
Cluster-4389.2579	Cluster-4389.2579	Cluster-4389.2579;orf1	1.123578946	0.00776081	5.5183	2.06E-05
Cluster-4389.2513	Cluster-4389.2513	Cluster-4389.2513;orf1	0.290195249	0.007807515	1.1356	0.22311
Cluster-4389.4820	Cluster-4389.4820	Cluster-4389.4820;orf1	-0.671181396	0.007854389	-0.69825	0.30611
Cluster-4389.7937	Cluster-4389.7937	Cluster-4389.7937;orf1	1.562971592	0.007875228	3.007	0.028392
Cluster-4389.15064	Cluster-4389.15064	Cluster-4389.15064;orf1	0.181033812	0.007903933	-0.22214	0.76165
Cluster-4389.8309	Cluster-4389.8309	Cluster-4389.8309;orf1	-0.656778211	0.007925306	-0.19729	0.78833
Cluster-4389.14028	Cluster-4389.14028	Cluster-4389.14028;orf1	0.546200311	0.007937509	0.96759	0.40431
Cluster-4389.10672	Cluster-4389.10672	Cluster-4389.10672;orf1	0.645062328	0.007985038	1.5704	0.17038
Cluster-4389.10427	Cluster-4389.10427	Cluster-4389.10427;orf1	0.453084577	0.007997294	2.495	0.00014265
Cluster-4389.3941	Cluster-4389.3941	Cluster-4389.3941;orf1	-0.602686489	0.008085317	1.1761	0.15521
Cluster-16543.0	Cluster-16543.0	Cluster-16543.0;orf1	-0.670831019	0.008134027	0.49269	0.57037
Cluster-13542.0	Cluster-13542.0	Cluster-13542.0;orf1	1.430584183	0.00813624	-0.70426	0.77818
Cluster-4389.12654	Cluster-4389.12654	Cluster-4389.12654;orf1	0.508081115	0.008137569	0.83172	0.24752
Cluster-4389.7705	Cluster-4389.7705	Cluster-4389.7705;orf1	0.560982176	0.008161948	2.385	0.014444
Cluster-21502.0	Cluster-21502.0	Cluster-21502.0;	0.43583209	0.008178556	3.3917	0.0043658
Cluster-4389.11409	Cluster-4389.11409	Cluster-4389.11409;orf2	1.077945758	0.008181799	2.1655	NA
Cluster-4389.12092	Cluster-4389.12092	Cluster-4389.12092;orf1	1.870012699	0.008192806	4.0929	0.050622
Cluster-16154.0	Cluster-16154.0	Cluster-16154.0;orf1	-0.525237779	0.008193612	-2.5968	0.1363
Cluster-4389.1865	Cluster-4389.1865	Cluster-4389.1865;orf2	0.651412664	0.008208146	0.4297	0.71413
Cluster-4389.15735	Cluster-4389.15735	Cluster-4389.15735;orf1	0.772332637	0.008229843	0.3487	0.74859
Cluster-17630.0	Cluster-17630.0	Cluster-17630.0;orf1	0.23776117	0.008245337	-0.86687	0.35684
Cluster-7319.0	Cluster-7319.0	Cluster-7319.0;orf1	-0.684066403	0.008248191	0.48494	0.74834
Cluster-4389.156	Cluster-4389.156	Cluster-4389.156;orf1	0.788995583	0.008260607	1.0896	0.44007
Cluster-18992.0	Cluster-18992.0	Cluster-18992.0;orf1	-0.391749432	0.008285418	0.025733	0.97383
Cluster-2538.0	Cluster-2538.0	Cluster-2538.0;	-0.634540543	0.008329498	0.012584	0.99749
Cluster-4389.13760	Cluster-4389.13760	Cluster-4389.13760;	0.516841663	0.008358518	-0.25797	0.92279
Cluster-4389.15195	Cluster-4389.15195	Cluster-4389.15195;orf1	0.596827069	0.008403033	1.8751	0.10228
Cluster-4389.12324	Cluster-4389.12324	Cluster-4389.12324;orf1	1.486056963	0.00841753	4.7397	4.37E-06
Cluster-8094.0	Cluster-8094.0	Cluster-8094.0;orf1	0.507568785	0.008510007	1.6573	0.24221
Cluster-4389.1400	Cluster-4389.1400	Cluster-4389.1400;orf1	1.036422544	0.008515031	1.9952	0.015016
Cluster-18412.0	Cluster-18412.0	Cluster-18412.0;orf1	-0.332007794	0.008564745	-1.592	0.065699
Cluster-4389.16418	Cluster-4389.16418	Cluster-4389.16418;orf1	-0.874478337	0.008567103	-1.0554	0.4146
Cluster-4389.7711	Cluster-4389.7711	Cluster-4389.7711;orf1	-0.598074228	0.008599885	-0.13634	0.93874
Cluster-1649.0	Cluster-1649.0	Cluster-1649.0;orf1	-1.157313193	0.008605169	0.57999	0.88383
Cluster-4389.8713	Cluster-4389.8713	Cluster-4389.8713;orf1	0.441122317	0.008610276	0.80505	0.39575
Cluster-4389.12272	Cluster-4389.12272	Cluster-4389.12272;orf1	1.164467924	0.008612025	3.2491	0.001997
Cluster-4389.16450	Cluster-4389.16450	Cluster-4389.16450;orf1	1.455040558	0.008630339	3.2457	2.49E-05
Cluster-4389.6235	Cluster-4389.6235	Cluster-4389.6235;orf1	0.163910597	0.008665707	3.8695	0.15307
Cluster-12807.0	Cluster-12807.0	Cluster-12807.0;orf1	0.683175511	0.008684172	0.81292	0.60137
Cluster-17100.0	Cluster-17100.0	Cluster-17100.0;	0.174857919	0.008703535	-0.18019	0.82227
Cluster-4389.11095	Cluster-4389.11095	Cluster-4389.11095;orf1	0.303279555	0.008759842	1.8301	0.020681
Cluster-7754.0	Cluster-7754.0	Cluster-7754.0;orf1	0.571777479	0.008793845	-2.7537	0.31526
Cluster-4389.1734	Cluster-4389.1734	Cluster-4389.1734;orf1	-0.416393154	0.008802398	-0.54368	0.46267
Cluster-4389.10541	Cluster-4389.10541	Cluster-4389.10541;orf1	0.477524998	0.008817723	1.4274	0.21109
Cluster-4389.4749	Cluster-4389.4749	Cluster-4389.4749;orf1	-0.45067138	0.008888616	-1.7152	0.21484
Cluster-4389.16057	Cluster-4389.16057	Cluster-4389.16057;orf1	0.517801863	0.008895324	0.94822	0.5019
Cluster-4389.3235	Cluster-4389.3235	Cluster-4389.3235;orf1	1.209154765	0.008917874	-1.5538	0.26349
Cluster-4389.16561	Cluster-4389.16561	Cluster-4389.16561;orf1	1.003197833	0.008922175	2.491	0.41298
Cluster-4389.970	Cluster-4389.970	Cluster-4389.970;orf1	0.892667196	0.008922331	2.6493	0.00051824
Cluster-21347.0	Cluster-21347.0	Cluster-21347.0;orf1	0.556231267	0.008940367	-0.36045	0.59985
Cluster-21927.0	Cluster-21927.0	Cluster-21927.0;orf1	-0.453888428	0.008945382	-2.9362	0.28509
Cluster-20511.0	Cluster-20511.0	Cluster-20511.0;orf1	0.221223742	0.008957873	-0.057699	0.93484
Cluster-4389.10337	Cluster-4389.10337	Cluster-4389.10337;orf2	2.797172823	0.008999557	3.4483	0.0016669
Cluster-4389.2832	Cluster-4389.2832	Cluster-4389.2832;orf1	0.507003427	0.009008893	0.57742	0.36414
Cluster-18725.0	Cluster-18725.0	Cluster-18725.0;orf1	0.803086856	0.009068767	0.49633	0.50004
Cluster-16283.0	Cluster-16283.0	Cluster-16283.0;orf1	0.7715694	0.009071947	0.55157	0.86114
Cluster-13160.0	Cluster-13160.0	Cluster-13160.0;orf1	-0.090963629	0.009072487	-0.41649	0.91547
Cluster-4389.13316	Cluster-4389.13316	Cluster-4389.13316;orf1	0.3193263	0.009109522	2.3246	0.0031952
Cluster-4389.4167	Cluster-4389.4167	Cluster-4389.4167;orf1	-0.25603066	0.00912139	-1.6653	0.15466
Cluster-8988.0	Cluster-8988.0	Cluster-8988.0;	-1.094888688	0.009131346	-2.6015	0.32718
Cluster-4389.3174	Cluster-4389.3174	Cluster-4389.3174;orf1	0.62238604	0.009168694	3.6784	0.018972
Cluster-4389.9605	Cluster-4389.9605	Cluster-4389.9605;orf1	0.641758206	0.009196076	0.16061	0.8499
Cluster-19164.0	Cluster-19164.0	Cluster-19164.0;orf1	0.922124813	0.009214116	1.1305	0.65461
Cluster-13772.0	Cluster-13772.0	Cluster-13772.0;orf1	-0.113527538	0.009273891	-0.19414	0.87274
Cluster-4389.16937	Cluster-4389.16937	Cluster-4389.16937;orf1	-0.878819332	0.009296788	0.18614	0.93265
Cluster-4389.9182	Cluster-4389.9182	Cluster-4389.9182;orf1	-0.213699804	0.009309636	-0.92967	0.33563
Cluster-4389.4690	Cluster-4389.4690	Cluster-4389.4690;orf1	0.631977976	0.009324746	-1.3989	0.20962
Cluster-4389.1611	Cluster-4389.1611	Cluster-4389.1611;orf1	0.428072607	0.009346175	-0.45321	0.57241
Cluster-4389.1628	Cluster-4389.1628	Cluster-4389.1628;orf1	0.596655535	0.00936486	1.0197	0.15924
Cluster-18652.0	Cluster-18652.0	Cluster-18652.0;orf1	-0.334946647	0.009398206	-1.4407	0.12525
Cluster-4252.0	Cluster-4252.0	Cluster-4252.0;	0.733184085	0.00939883	0.17366	0.96527
Cluster-22046.1	Cluster-22046.1	Cluster-22046.1;orf1	0.827126946	0.009400571	-1.0724	0.59672
Cluster-4389.11205	Cluster-4389.11205	Cluster-4389.11205;orf1	0.624807396	0.00940122	1.209	0.1451
Cluster-10407.0	Cluster-10407.0	Cluster-10407.0;orf1	1.139873443	0.009405263	2.3582	0.095726
Cluster-15671.0	Cluster-15671.0	Cluster-15671.0;orf1	-0.916095701	0.009435774	-8.4121	3.01E-06
Cluster-4389.15648	Cluster-4389.15648	Cluster-4389.15648;orf1	1.438306083	0.009448634	2.4799	0.0069663
Cluster-4389.8220	Cluster-4389.8220	Cluster-4389.8220;orf1	-0.891162747	0.009521461	-1.6845	0.062602
Cluster-17831.0	Cluster-17831.0	Cluster-17831.0;orf1	-0.278755442	0.009558676	-0.78983	0.2618
Cluster-4389.10023	Cluster-4389.10023	Cluster-4389.10023;orf1	0.789240898	0.009563037	-0.30548	0.93926
Cluster-4986.0	Cluster-4986.0	Cluster-4986.0;orf1	-1.068571603	0.009581719	1.4719	0.7018
Cluster-18979.0	Cluster-18979.0	Cluster-18979.0;orf1	-0.786044416	0.009586862	-0.98095	0.51804
Cluster-4389.8883	Cluster-4389.8883	Cluster-4389.8883;orf1	-0.559457774	0.009592012	-1.7164	0.049677
Cluster-11310.0	Cluster-11310.0	Cluster-11310.0;	-0.640766405	0.009595395	-0.97825	0.80429
Cluster-4389.2722	Cluster-4389.2722	Cluster-4389.2722;	0.744733428	0.009622812	0.918	0.57964
Cluster-4389.12916	Cluster-4389.12916	Cluster-4389.12916;orf1	1.251700703	0.00965257	8.2548	9.06E-14
Cluster-4389.765	Cluster-4389.765	Cluster-4389.765;orf1	0.505673591	0.009674176	2.0368	0.17728
Cluster-11264.0	Cluster-11264.0	Cluster-11264.0;	-0.563553608	0.0096775	-1.0173	0.67675
Cluster-4389.1715	Cluster-4389.1715	Cluster-4389.1715;orf1	0.669858463	0.009706849	0.29004	0.90658
Cluster-15037.0	Cluster-15037.0	Cluster-15037.0;orf1	-0.852429303	0.009713971	-3.7745	0.019602
Cluster-18079.0	Cluster-18079.0	Cluster-18079.0;	-1.022799869	0.009719393	-1.9101	0.064436
Cluster-20782.0	Cluster-20782.0	Cluster-20782.0;orf1	-0.739764228	0.00976522	1.3186	0.51431
Cluster-21603.0	Cluster-21603.0	Cluster-21603.0;	0.718125155	0.009798573	-0.72255	0.4294
Cluster-17670.0	Cluster-17670.0	Cluster-17670.0;orf1	-0.715286824	0.00985807	-4.2116	0.016455
Cluster-8776.0	Cluster-8776.0	Cluster-8776.0;orf1	0.902173062	0.009878995	0.040603	0.98804
Cluster-4389.10194	Cluster-4389.10194	Cluster-4389.10194;orf1	0.835241129	0.009898283	-3.149	0.17458
Cluster-4389.15311	Cluster-4389.15311	Cluster-4389.15311;orf1	0.21635295	0.009903076	-0.020626	0.97494
Cluster-4389.6317	Cluster-4389.6317	Cluster-4389.6317;orf1	-0.853287812	0.009905693	-2.5751	0.048204
Cluster-13932.0	Cluster-13932.0	Cluster-13932.0;orf1	0.724417469	0.009933475	-1.4381	0.71576
Cluster-4389.13106	Cluster-4389.13106	Cluster-4389.13106;orf1	1.491387641	0.010010846	3.7223	7.50E-05
Cluster-6297.0	Cluster-6297.0	Cluster-6297.0;orf1	-1.114224116	0.010013647	1.8536	0.44556
Cluster-16231.0	Cluster-16231.0	Cluster-16231.0;orf1	0.513520239	0.010056983	-1.159	0.53099
Cluster-4389.15163	Cluster-4389.15163	Cluster-4389.15163;orf1	0.521833909	0.010089847	0.68631	0.49493
Cluster-4389.13481	Cluster-4389.13481	Cluster-4389.13481;orf1	1.506151846	0.010103654	2.5952	0.017446
Cluster-18507.0	Cluster-18507.0	Cluster-18507.0;orf1	-0.225413437	0.010122595	0.93718	0.236
Cluster-4389.8881	Cluster-4389.8881	Cluster-4389.8881;orf1	-1.022328163	0.010123373	-4.9737	2.02E-08
Cluster-4389.2061	Cluster-4389.2061	Cluster-4389.2061;orf1	0.636982823	0.010168901	0.63545	0.49993
Cluster-4389.5656	Cluster-4389.5656	Cluster-4389.5656;orf1	0.258703805	0.010211445	1.3442	0.077921
Cluster-4389.13360	Cluster-4389.13360	Cluster-4389.13360;orf2	1.148851939	0.010286899	4.5108	2.10E-05
Cluster-17013.0	Cluster-17013.0	Cluster-17013.0;orf1	-1.204032856	0.010289933	0.70311	0.81236
Cluster-6718.0	Cluster-6718.0	Cluster-6718.0;orf1	-0.766208116	0.010424022	0.11113	0.97334
Cluster-79.0	Cluster-79.0	Cluster-79.0;orf1	-0.387421586	0.010441182	0.57013	0.8858
Cluster-4389.11445	Cluster-4389.11445	Cluster-4389.11445;orf1	1.972211688	0.010461005	3.5766	3.97E-06
Cluster-7400.0	Cluster-7400.0	Cluster-7400.0;orf1	1.472736971	0.010466397	0.01908	0.99554
Cluster-4389.15586	Cluster-4389.15586	Cluster-4389.15586;orf1	1.381768715	0.010471362	3.4753	0.0071637
Cluster-20092.0	Cluster-20092.0	Cluster-20092.0;orf1	0.991968274	0.010484358	0.618	0.48475
Cluster-4389.3279	Cluster-4389.3279	Cluster-4389.3279;	1.015011213	0.010589551	4.2797	0.00041853
Cluster-4389.5673	Cluster-4389.5673	Cluster-4389.5673;orf1	1.018412164	0.010613598	1.4064	0.051076
Cluster-4389.1727	Cluster-4389.1727	Cluster-4389.1727;orf1	-1.105614743	0.010669945	-2.0136	0.037021
Cluster-20471.0	Cluster-20471.0	Cluster-20471.0;orf1	1.179734869	0.010675368	2.171	0.023602
Cluster-10163.0	Cluster-10163.0	Cluster-10163.0;orf1	-0.216673163	0.010684335	1.6736	0.16523
Cluster-4389.2071	Cluster-4389.2071	Cluster-4389.2071;orf1	-0.657925514	0.010731945	-1.3013	0.048126
Cluster-13841.0	Cluster-13841.0	Cluster-13841.0;orf1	2.275007048	0.010756607	-1.7505	0.65878
Cluster-6035.0	Cluster-6035.0	Cluster-6035.0;orf1	0.962991116	0.010772321	-1.9301	0.4167
Cluster-13789.0	Cluster-13789.0	Cluster-13789.0;	-1.006789938	0.010778494	-2.3453	0.55625
Cluster-4389.8917	Cluster-4389.8917	Cluster-4389.8917;orf1	0.792784574	0.010784534	1.1641	0.27328
Cluster-22037.0	Cluster-22037.0	Cluster-22037.0;orf1	-0.332045243	0.0108118	-4.0288	0.071544
Cluster-10530.0	Cluster-10530.0	Cluster-10530.0;	0.342414783	0.010838969	0.68758	0.7924
Cluster-4389.4288	Cluster-4389.4288	Cluster-4389.4288;orf1	0.745459212	0.010879304	-0.15757	0.9021
Cluster-4389.4557	Cluster-4389.4557	Cluster-4389.4557;orf1	-0.349828223	0.010901631	0.67515	0.54035
Cluster-4389.14943	Cluster-4389.14943	Cluster-4389.14943;orf1	0.704183421	0.011036208	1.1175	0.087687
Cluster-4389.4908	Cluster-4389.4908	Cluster-4389.4908;orf1	1.265012598	0.011058826	1.6268	0.093101
Cluster-4389.1233	Cluster-4389.1233	Cluster-4389.1233;orf1	0.895246617	0.011063379	2.4188	0.095593
Cluster-4389.11155	Cluster-4389.11155	Cluster-4389.11155;orf1	1.491430159	0.01109743	12.948	1.55E-20
Cluster-17200.0	Cluster-17200.0	Cluster-17200.0;orf1	0.46163583	0.011135578	0.21376	0.91513
Cluster-4389.11240	Cluster-4389.11240	Cluster-4389.11240;orf1	0.497304816	0.011189048	-0.52602	0.5465
Cluster-4389.16717	Cluster-4389.16717	Cluster-4389.16717;orf1	-1.104426039	0.011239649	-2.4042	0.00025368
Cluster-10581.0	Cluster-10581.0	Cluster-10581.0;orf1	-0.429888551	0.011276669	2.8804	0.1069
Cluster-11272.0	Cluster-11272.0	Cluster-11272.0;orf1	-0.659487477	0.011319441	-2.123	0.54401
Cluster-6106.0	Cluster-6106.0	Cluster-6106.0;	-0.72019837	0.011448438	-5.2554	0.041702
Cluster-16846.1	Cluster-16846.1	Cluster-16846.1;orf1	0.590263875	0.011488612	0.080594	0.92348
Cluster-16725.0	Cluster-16725.0	Cluster-16725.0;orf1	0.214288653	0.011534761	-0.067979	0.93396
Cluster-17959.0	Cluster-17959.0	Cluster-17959.0;orf1	-0.500497554	0.011583099	-0.61395	0.49282
Cluster-18829.0	Cluster-18829.0	Cluster-18829.0;orf1	-0.522459634	0.011590266	1.3573	0.11728
Cluster-4389.3506	Cluster-4389.3506	Cluster-4389.3506;orf1	1.965849605	0.011614981	5.0656	0.012881
Cluster-16006.0	Cluster-16006.0	Cluster-16006.0;orf1	-0.785626164	0.011624752	0.64929	0.48886
Cluster-7403.0	Cluster-7403.0	Cluster-7403.0;orf1	0.359704987	0.011634555	0.052003	0.98192
Cluster-21448.0	Cluster-21448.0	Cluster-21448.0;orf1	0.650153321	0.011636159	0.35615	0.62608
Cluster-11450.1	Cluster-11450.1	Cluster-11450.1;	-0.643187605	0.011642364	0.57013	0.8858
Cluster-4389.4335	Cluster-4389.4335	Cluster-4389.4335;orf1	0.725979543	0.011653313	1.1002	0.28336
Cluster-4389.747	Cluster-4389.747	Cluster-4389.747;orf1	0.168919684	0.011684257	0.20388	0.90039
Cluster-4389.14540	Cluster-4389.14540	Cluster-4389.14540;orf1	1.475868166	0.011703452	10.34	1.71E-13
Cluster-8497.0	Cluster-8497.0	Cluster-8497.0;	0.782023623	0.011707039	1.9162	0.405
Cluster-21068.0	Cluster-21068.0	Cluster-21068.0;orf1	1.30570178	0.011845142	0.96184	0.26996
Cluster-4389.10440	Cluster-4389.10440	Cluster-4389.10440;orf1	1.136999701	0.011911647	0.59375	0.69212
Cluster-19531.0	Cluster-19531.0	Cluster-19531.0;orf1	0.268612338	0.012082956	-1.1094	0.18921
Cluster-4389.3379	Cluster-4389.3379	Cluster-4389.3379;orf1	0.290037969	0.012119473	0.76644	0.28281
Cluster-22065.0	Cluster-22065.0	Cluster-22065.0;orf1	-0.531415309	0.012141391	-1.2681	0.07125
Cluster-15763.0	Cluster-15763.0	Cluster-15763.0;orf1	1.213736096	0.012164767	-1.6043	0.18625
Cluster-21244.0	Cluster-21244.0	Cluster-21244.0;orf1	-0.584962501	0.012168184	-4.4313	0.087871
Cluster-15715.0	Cluster-15715.0	Cluster-15715.0;orf1	0.419203817	0.012191272	0.55016	0.49739
Cluster-4389.8714	Cluster-4389.8714	Cluster-4389.8714;orf1	0.135511866	0.012209976	-1.4791	0.25776
Cluster-4389.1101	Cluster-4389.1101	Cluster-4389.1101;orf1	-0.436861754	0.012312161	-1.4615	0.48043
Cluster-4389.4072	Cluster-4389.4072	Cluster-4389.4072;orf1	0.284391204	0.012336885	-0.17136	0.80448
Cluster-4389.2223	Cluster-4389.2223	Cluster-4389.2223;orf1	0.803839943	0.012427674	0.89134	0.57955
Cluster-4389.4463	Cluster-4389.4463	Cluster-4389.4463;orf1	1.121505575	0.012427848	0.83943	0.26613
Cluster-4389.2706	Cluster-4389.2706	Cluster-4389.2706;orf1	0.808951707	0.012446477	0.78578	0.43525
Cluster-4687.0	Cluster-4687.0	Cluster-4687.0;	-0.176422308	0.012488501	1.6665	0.67206
Cluster-4389.6063	Cluster-4389.6063	Cluster-4389.6063;orf1	0.191802236	0.012515237	-1.471	0.19448
Cluster-15625.0	Cluster-15625.0	Cluster-15625.0;orf1	0.894976036	0.012596912	2.6795	0.00091501
Cluster-19005.0	Cluster-19005.0	Cluster-19005.0;orf1	0.302292278	0.012622069	-0.39045	0.58933
Cluster-4389.2869	Cluster-4389.2869	Cluster-4389.2869;orf1	0.582873394	0.012638951	3.0453	0.0069444
Cluster-4389.7750	Cluster-4389.7750	Cluster-4389.7750;orf1	0.480729184	0.012658271	0.90363	0.27453
Cluster-4389.13559	Cluster-4389.13559	Cluster-4389.13559;orf1	0.465141403	0.012669841	0.23653	0.76105
Cluster-4389.13420	Cluster-4389.13420	Cluster-4389.13420;orf1	0.935019969	0.012679453	0.91939	0.14355
Cluster-12116.0	Cluster-12116.0	Cluster-12116.0;	0.803284109	0.012685501	0.12702	0.9598
Cluster-21537.0	Cluster-21537.0	Cluster-21537.0;orf1	-0.592272996	0.012712324	-1.9421	0.14522
Cluster-7985.0	Cluster-7985.0	Cluster-7985.0;orf1	0.846382853	0.01275725	-1.0417	0.79097
Cluster-4389.12545	Cluster-4389.12545	Cluster-4389.12545;orf1	0.504760075	0.012796116	-0.33125	0.64301
Cluster-7927.0	Cluster-7927.0	Cluster-7927.0;	0.289297373	0.012834615	-0.054231	0.97218
Cluster-20000.0	Cluster-20000.0	Cluster-20000.0;orf1	-0.168985981	0.01283483	0.87904	0.61769
Cluster-7029.0	Cluster-7029.0	Cluster-7029.0;orf1	1.292611757	0.01287071	-1.8203	0.49489
Cluster-4389.8900	Cluster-4389.8900	Cluster-4389.8900;	0.183704386	0.012873726	0.26863	0.66345
Cluster-13114.0	Cluster-13114.0	Cluster-13114.0;orf1	0.317453591	0.012888929	0.96576	0.70849
Cluster-7802.0	Cluster-7802.0	Cluster-7802.0;	-0.305715108	0.012903431	-1.676	0.6484
Cluster-18164.0	Cluster-18164.0	Cluster-18164.0;	0.845140736	0.012904855	-1.084	0.73288
Cluster-6137.0	Cluster-6137.0	Cluster-6137.0;orf1	-1.247513821	0.012946407	-0.89914	0.58283
Cluster-9259.0	Cluster-9259.0	Cluster-9259.0;orf1	-0.962355226	0.012971401	-1.6337	0.44902
Cluster-4389.15493	Cluster-4389.15493	Cluster-4389.15493;orf1	0.684619123	0.012971753	0.52997	0.65744
Cluster-18168.0	Cluster-18168.0	Cluster-18168.0;orf1	0.404481745	0.012983123	0.83736	0.26521
Cluster-15425.0	Cluster-15425.0	Cluster-15425.0;orf1	-0.789450561	0.012984461	-3.678	0.0023973
Cluster-17435.0	Cluster-17435.0	Cluster-17435.0;orf1	0.396901559	0.012998371	-0.4159	0.88432
Cluster-19224.0	Cluster-19224.0	Cluster-19224.0;orf1	0.519621482	0.013080376	0.90559	0.21698
Cluster-4389.3893	Cluster-4389.3893	Cluster-4389.3893;orf1	1.119125381	0.013108148	1.4758	0.40014
Cluster-5101.0	Cluster-5101.0	Cluster-5101.0;orf1	0.64385619	0.013194175	3.535	0.13581
Cluster-8888.0	Cluster-8888.0	Cluster-8888.0;	-2.074146734	0.013211406	-2.5721	0.3475
Cluster-21145.0	Cluster-21145.0	Cluster-21145.0;orf1	0.30485808	0.013212687	0.1856	0.82637
Cluster-4389.4360	Cluster-4389.4360	Cluster-4389.4360;orf1	1.767226809	0.013222763	2.2025	0.0061509
Cluster-4389.12333	Cluster-4389.12333	Cluster-4389.12333;orf1	0.191390451	0.013263901	-0.12309	0.87583
Cluster-16908.0	Cluster-16908.0	Cluster-16908.0;orf1	0.877564471	0.013291927	1.8612	0.061005
Cluster-20231.0	Cluster-20231.0	Cluster-20231.0;orf1	-0.649934712	0.013299448	0.37056	0.56933
Cluster-9278.0	Cluster-9278.0	Cluster-9278.0;orf1	0.540524968	0.013331266	0.066321	0.96326
Cluster-16110.0	Cluster-16110.0	Cluster-16110.0;orf1	-0.301077864	0.013336136	-1.6532	0.026604
Cluster-4074.0	Cluster-4074.0	Cluster-4074.0;orf1	0.630157095	0.013346708	3.1569	0.2232
Cluster-4389.11690	Cluster-4389.11690	Cluster-4389.11690;orf1	1.323463631	0.013356315	0.77591	0.54343
Cluster-21981.0	Cluster-21981.0	Cluster-21981.0;orf1	-0.942060661	0.013445479	-1.1571	0.31628
Cluster-16842.0	Cluster-16842.0	Cluster-16842.0;orf1	-0.157058086	0.013507861	0.043025	0.96732
Cluster-4389.7807	Cluster-4389.7807	Cluster-4389.7807;orf1	-1.371237156	0.013520868	-1.2903	0.17005
Cluster-14444.0	Cluster-14444.0	Cluster-14444.0;orf1	-0.193181695	0.013569675	1.4254	0.51708
Cluster-13637.1	Cluster-13637.1	Cluster-13637.1;orf1	0.529170691	0.013615565	1.6499	0.39208
Cluster-16917.0	Cluster-16917.0	Cluster-16917.0;orf1	-0.329852758	0.013673654	0.22812	0.82939
Cluster-4389.12977	Cluster-4389.12977	Cluster-4389.12977;orf1	-0.599314071	0.013681326	-1.0369	0.14506
Cluster-4389.12244	Cluster-4389.12244	Cluster-4389.12244;orf1	1.569031312	0.013750337	7.5849	1.41E-12
Cluster-14416.0	Cluster-14416.0	Cluster-14416.0;orf1	0.55824708	0.013969833	0.13815	0.92896
Cluster-4389.6171	Cluster-4389.6171	Cluster-4389.6171;orf1	0.652269117	0.014043717	0.53771	0.41435
Cluster-17426.0	Cluster-17426.0	Cluster-17426.0;orf1	0.295731083	0.014044534	0.35137	0.67346
Cluster-5951.0	Cluster-5951.0	Cluster-5951.0;orf1	0.851916047	0.014045643	-1.1024	0.7736
Cluster-8531.0	Cluster-8531.0	Cluster-8531.0;orf1	0.470488986	0.014068704	2.3304	0.033643
Cluster-3908.0	Cluster-3908.0	Cluster-3908.0;orf1	-0.520981875	0.014096032	1.3171	0.73847
Cluster-22099.0	Cluster-22099.0	Cluster-22099.0;orf1	1.053111336	0.014102993	3.6149	0.0006008
Cluster-4389.7236	Cluster-4389.7236	Cluster-4389.7236;orf1	-0.602954254	0.014119907	-1.2427	0.13034
Cluster-4389.4333	Cluster-4389.4333	Cluster-4389.4333;orf1	0.720721884	0.014120518	2.1381	0.060731
Cluster-4389.8559	Cluster-4389.8559	Cluster-4389.8559;orf1	0.704068399	0.014154731	0.17972	0.78578
Cluster-4389.8234	Cluster-4389.8234	Cluster-4389.8234;orf2	0.64673626	0.014233786	1.6892	0.16451
Cluster-20868.0	Cluster-20868.0	Cluster-20868.0;	-0.64397358	0.014274491	-0.79192	0.66067
Cluster-4389.910	Cluster-4389.910	Cluster-4389.910;orf1	-0.824984714	0.014282746	-0.57979	0.48845
Cluster-20672.0	Cluster-20672.0	Cluster-20672.0;orf1	-0.307295467	0.014318584	0.21558	0.79242
Cluster-18509.0	Cluster-18509.0	Cluster-18509.0;orf1	-0.318527106	0.014321161	-0.92848	0.2865
Cluster-4389.4215	Cluster-4389.4215	Cluster-4389.4215;orf1	0.37306546	0.014334018	-0.3463	0.5872
Cluster-4389.12935	Cluster-4389.12935	Cluster-4389.12935;orf1	0.419975725	0.01434255	0.92109	0.22272
Cluster-4389.11627	Cluster-4389.11627	Cluster-4389.11627;orf1	0.369565317	0.014343902	1.1082	0.089664
Cluster-4389.5740	Cluster-4389.5740	Cluster-4389.5740;orf1	0.685884365	0.014348063	0.014017	0.99075
Cluster-21850.0	Cluster-21850.0	Cluster-21850.0;orf1	0.350347855	0.014400783	2.1646	0.0019856
Cluster-10179.0	Cluster-10179.0	Cluster-10179.0;orf1	-0.291954812	0.014423487	0.80755	0.5799
Cluster-4389.4633	Cluster-4389.4633	Cluster-4389.4633;	0.063707751	0.01447899	1.9263	0.0063739
Cluster-4389.5058	Cluster-4389.5058	Cluster-4389.5058;orf1	0.891033401	0.014500492	1.7429	0.0083563
Cluster-4389.14313	Cluster-4389.14313	Cluster-4389.14313;	1.643693694	0.01453184	0.34368	0.75921
Cluster-4389.4226	Cluster-4389.4226	Cluster-4389.4226;orf1	0.458906422	0.014537866	1.9371	0.00397
Cluster-4389.14872	Cluster-4389.14872	Cluster-4389.14872;orf1	0.306452298	0.014602458	1.5634	0.1786
Cluster-12225.0	Cluster-12225.0	Cluster-12225.0;orf1	-0.31851258	0.014672259	-2.1243	0.10495
Cluster-4389.9375	Cluster-4389.9375	Cluster-4389.9375;orf1	-0.276760815	0.014693267	0.56019	0.47626
Cluster-4389.6286	Cluster-4389.6286	Cluster-4389.6286;orf1	0.594719986	0.014708279	1.0849	0.077102
Cluster-4389.12693	Cluster-4389.12693	Cluster-4389.12693;orf1	-0.778908708	0.014708587	-2.1546	0.13108
Cluster-4389.5824	Cluster-4389.5824	Cluster-4389.5824;orf1	0.429804052	0.014711016	0.29232	0.80953
Cluster-4389.3959	Cluster-4389.3959	Cluster-4389.3959;orf1	1.096349743	0.01472166	10.154	1.82E-12
Cluster-10025.0	Cluster-10025.0	Cluster-10025.0;orf1	0.638411596	0.014749566	0.48877	0.83492
Cluster-19691.0	Cluster-19691.0	Cluster-19691.0;orf1	0.401947636	0.014749966	1.2992	0.19778
Cluster-4389.15683	Cluster-4389.15683	Cluster-4389.15683;orf1	0.896755491	0.014763828	4.4832	0.00043696
Cluster-4389.15047	Cluster-4389.15047	Cluster-4389.15047;orf1	0.350203274	0.014783665	-1.0379	0.43633
Cluster-21846.0	Cluster-21846.0	Cluster-21846.0;orf1	0.51121172	0.014799285	0.26452	0.7871
Cluster-4389.11091	Cluster-4389.11091	Cluster-4389.11091;orf1	-0.214450206	0.014802483	-0.059385	0.92511
Cluster-19734.0	Cluster-19734.0	Cluster-19734.0;orf2	0.795173834	0.014824326	1.9262	0.00511
Cluster-20459.0	Cluster-20459.0	Cluster-20459.0;orf1	0.398096513	0.014888337	-0.49895	0.64685
Cluster-4389.1086	Cluster-4389.1086	Cluster-4389.1086;orf1	0.862437491	0.014969162	0.43807	0.49491
Cluster-4389.4500	Cluster-4389.4500	Cluster-4389.4500;orf1	1.224112475	0.015001935	6.3817	1.64E-11
Cluster-20163.0	Cluster-20163.0	Cluster-20163.0;orf1	-1.172617377	0.015007183	-2.3708	0.0070038
Cluster-4389.12548	Cluster-4389.12548	Cluster-4389.12548;orf1	1.053269916	0.015036725	-2.0544	0.098594
Cluster-18691.0	Cluster-18691.0	Cluster-18691.0;orf1	-0.39043292	0.01504983	-1.529	0.073053
Cluster-4389.11545	Cluster-4389.11545	Cluster-4389.11545;orf1	0.804508912	0.01505087	2.0921	0.086661
Cluster-6331.0	Cluster-6331.0	Cluster-6331.0;orf1	-0.640814383	0.0150623	-4.1438	0.1742
Cluster-15022.0	Cluster-15022.0	Cluster-15022.0;orf1	0.544405129	0.015114776	2.7625	0.10484
Cluster-21290.0	Cluster-21290.0	Cluster-21290.0;orf1	-0.448585642	0.015158609	0.35881	0.75523
Cluster-4389.12189	Cluster-4389.12189	Cluster-4389.12189;orf1	-0.373141518	0.015210419	-1.1248	0.24231
Cluster-17075.0	Cluster-17075.0	Cluster-17075.0;orf1	0.3234935	0.015256065	0.050135	0.9632
Cluster-4389.647	Cluster-4389.647	Cluster-4389.647;orf1	-0.239545985	0.015257159	0.49682	0.70426
Cluster-4389.2121	Cluster-4389.2121	Cluster-4389.2121;orf1	0.727914374	0.01528768	0.58483	0.66046
Cluster-21583.0	Cluster-21583.0	Cluster-21583.0;orf1	0.943302334	0.015304106	1.5952	0.12391
Cluster-4389.15235	Cluster-4389.15235	Cluster-4389.15235;orf1	0.604509476	0.015317385	1.0716	0.46204
Cluster-16559.0	Cluster-16559.0	Cluster-16559.0;orf1	0.700391571	0.01533109	1.3364	0.21749
Cluster-4389.1749	Cluster-4389.1749	Cluster-4389.1749;orf1	-0.816809128	0.015373457	-0.91804	0.35554
Cluster-21470.0	Cluster-21470.0	Cluster-21470.0;	1.897268011	0.015374056	0.013923	0.99501
Cluster-4389.2200	Cluster-4389.2200	Cluster-4389.2200;orf1	-0.763853283	0.015388975	-0.94961	0.25254
Cluster-15387.0	Cluster-15387.0	Cluster-15387.0;orf1	0.627756611	0.015417637	-0.7179	0.30423
Cluster-173.0	Cluster-173.0	Cluster-173.0;orf1	0.554015186	0.015498545	0.97021	0.80621
Cluster-4389.8337	Cluster-4389.8337	Cluster-4389.8337;orf1	0.353382981	0.015586407	-0.5727	0.49481
Cluster-4389.5138	Cluster-4389.5138	Cluster-4389.5138;orf1	0.315110697	0.015603818	0.12286	0.91775
Cluster-4389.5674	Cluster-4389.5674	Cluster-4389.5674;orf1	0.849136026	0.015678689	3.8158	0.00024781
Cluster-15271.0	Cluster-15271.0	Cluster-15271.0;orf1	0.810139341	0.015765258	0.86846	0.31515
Cluster-14648.0	Cluster-14648.0	Cluster-14648.0;orf1	0.522417414	0.015766765	1.4308	0.44652
Cluster-4389.2765	Cluster-4389.2765	Cluster-4389.2765;orf1	0.857438374	0.01578294	1.5485	0.056489
Cluster-4389.11466	Cluster-4389.11466	Cluster-4389.11466;	1.272647645	0.015799352	11.08	4.27E-15
Cluster-15111.0	Cluster-15111.0	Cluster-15111.0;orf1	-0.94419204	0.015802821	-2.8108	0.26155
Cluster-4389.10405	Cluster-4389.10405	Cluster-4389.10405;orf1	1.334211856	0.015824072	-0.67463	0.69151
Cluster-19998.0	Cluster-19998.0	Cluster-19998.0;orf1	0.72341546	0.015881753	2.9077	0.0016168
Cluster-4389.10770	Cluster-4389.10770	Cluster-4389.10770;orf1	0.82080616	0.015928203	1.4914	0.16783
Cluster-4389.6597	Cluster-4389.6597	Cluster-4389.6597;	3.074879812	0.015965558	4.6253	9.29E-06
Cluster-4389.13325	Cluster-4389.13325	Cluster-4389.13325;orf1	1.163438702	0.015993143	4.1391	0.0041097
Cluster-4389.2006	Cluster-4389.2006	Cluster-4389.2006;orf1	0.526473906	0.01605783	-0.12785	0.91038
Cluster-4389.4603	Cluster-4389.4603	Cluster-4389.4603;orf1	0.804507662	0.016097927	1.9835	0.075065
Cluster-4389.5641	Cluster-4389.5641	Cluster-4389.5641;orf1	0.158269481	0.016121659	1.1604	0.4086
Cluster-21646.0	Cluster-21646.0	Cluster-21646.0;orf1	-0.490772715	0.016167497	0.79655	0.49718
Cluster-20502.0	Cluster-20502.0	Cluster-20502.0;orf1	0.506880789	0.016168752	-0.6533	0.63493
Cluster-791.0	Cluster-791.0	Cluster-791.0;	-0.371108776	0.016250551	-0.30548	0.93926
Cluster-4389.12155	Cluster-4389.12155	Cluster-4389.12155;orf1	0.659223827	0.016255952	0.18539	0.78958
Cluster-4389.14986	Cluster-4389.14986	Cluster-4389.14986;orf1	0.706698863	0.016263645	3.3748	0.00039751
Cluster-4389.15630	Cluster-4389.15630	Cluster-4389.15630;	1.109966919	0.016291543	-0.77047	0.76326
Cluster-16412.0	Cluster-16412.0	Cluster-16412.0;orf1	-0.723274634	0.016354524	-1.4071	0.093962
Cluster-4389.1916	Cluster-4389.1916	Cluster-4389.1916;orf1	-0.485898771	0.016360249	-0.48452	0.51303
Cluster-15510.0	Cluster-15510.0	Cluster-15510.0;orf1	-0.761108268	0.01638883	-2.8246	0.00029857
Cluster-8677.0	Cluster-8677.0	Cluster-8677.0;orf1	-0.675612749	0.01640193	-2.9111	0.063528
Cluster-4389.14817	Cluster-4389.14817	Cluster-4389.14817;orf1	-0.725169481	0.016461648	-1.5801	0.02375
Cluster-20385.0	Cluster-20385.0	Cluster-20385.0;orf1	-0.41235819	0.016485214	-0.37024	0.59299
Cluster-4389.1343	Cluster-4389.1343	Cluster-4389.1343;orf1	-1.003331833	0.0165251	-3.9147	0.024953
Cluster-4389.5598	Cluster-4389.5598	Cluster-4389.5598;	1.615017326	0.016560927	3.5941	0.01017
Cluster-21810.0	Cluster-21810.0	Cluster-21810.0;orf1	-0.2584526	0.016580396	-0.41363	0.68498
Cluster-4389.880	Cluster-4389.880	Cluster-4389.880;orf1	0.411553743	0.016630028	-0.64907	0.27717
Cluster-4389.15315	Cluster-4389.15315	Cluster-4389.15315;orf1	0.395796492	0.016678343	-0.10649	0.8942
Cluster-16313.0	Cluster-16313.0	Cluster-16313.0;orf1	0.377817233	0.016711043	-2.1531	0.1362
Cluster-4389.5876	Cluster-4389.5876	Cluster-4389.5876;orf1	-0.392945711	0.016721162	1.6498	0.092811
Cluster-4389.6017	Cluster-4389.6017	Cluster-4389.6017;orf1	1.540171858	0.016785125	-0.48644	0.62026
Cluster-15243.0	Cluster-15243.0	Cluster-15243.0;orf1	0.772448216	0.016791327	0.2308	0.77337
Cluster-18013.0	Cluster-18013.0	Cluster-18013.0;orf1	-0.380411156	0.016879681	-1.0717	0.26952
Cluster-4389.4403	Cluster-4389.4403	Cluster-4389.4403;orf1	1.232521248	0.016897156	4.321	0.00021885
Cluster-4389.4907	Cluster-4389.4907	Cluster-4389.4907;orf1	1.24601738	0.017039094	3.5549	9.64E-07
Cluster-14727.0	Cluster-14727.0	Cluster-14727.0;orf1	-0.417775928	0.0170528	0.12021	0.94907
Cluster-8475.1	Cluster-8475.1	Cluster-8475.1;	-1.598274046	0.017066448	2.4118	0.19801
Cluster-17056.0	Cluster-17056.0	Cluster-17056.0;orf1	-0.991715467	0.017175007	-3.5693	0.0015541
Cluster-17651.0	Cluster-17651.0	Cluster-17651.0;orf2	-0.142145757	0.017237972	-0.15703	0.85961
Cluster-4389.11346	Cluster-4389.11346	Cluster-4389.11346;orf1	0.221344319	0.01725806	-0.043411	0.94815
Cluster-19803.0	Cluster-19803.0	Cluster-19803.0;	-0.88239094	0.01727471	-3.7373	0.020344
Cluster-4389.5388	Cluster-4389.5388	Cluster-4389.5388;orf1	1.181719114	0.017322012	7.1889	9.19E-11
Cluster-4389.5436	Cluster-4389.5436	Cluster-4389.5436;orf1	0.455601237	0.01733682	-0.60308	0.33603
Cluster-4389.6559	Cluster-4389.6559	Cluster-4389.6559;orf1	-0.514213968	0.017351219	-1.3736	0.14024
Cluster-4389.12550	Cluster-4389.12550	Cluster-4389.12550;orf1	0.537185773	0.017411168	1.1093	0.070937
Cluster-4389.11380	Cluster-4389.11380	Cluster-4389.11380;orf1	1.364472618	0.017458232	5.2116	1.62E-08
Cluster-4389.1673	Cluster-4389.1673	Cluster-4389.1673;orf1	-0.361615484	0.017483469	-1.0556	0.13661
Cluster-4389.4014	Cluster-4389.4014	Cluster-4389.4014;orf1	3.366878625	0.01748356	-0.11227	0.93044
Cluster-4389.6833	Cluster-4389.6833	Cluster-4389.6833;orf1	0.510037524	0.017571894	1.1746	0.299
Cluster-15198.0	Cluster-15198.0	Cluster-15198.0;orf1	-0.543722208	0.017601146	-0.23304	0.76715
Cluster-4389.14379	Cluster-4389.14379	Cluster-4389.14379;orf1	0.299560282	0.017655635	0.90497	0.51225
Cluster-4389.15234	Cluster-4389.15234	Cluster-4389.15234;orf1	-0.756622554	0.017657339	1.9011	0.62878
Cluster-10232.0	Cluster-10232.0	Cluster-10232.0;orf1	1.425734389	0.017658491	3.0941	0.10444
Cluster-16494.0	Cluster-16494.0	Cluster-16494.0;orf1	-0.204149858	0.017664908	0.02906	0.96761
Cluster-4578.0	Cluster-4578.0	Cluster-4578.0;	1.42123664	0.01768626	1.8164	0.60144
Cluster-4389.15532	Cluster-4389.15532	Cluster-4389.15532;orf1	0.422233001	0.0176891	0.64985	0.32073
Cluster-9444.0	Cluster-9444.0	Cluster-9444.0;orf1	0.470756265	0.017738364	1.5141	0.15233
Cluster-4389.1593	Cluster-4389.1593	Cluster-4389.1593;orf1	0.985371551	0.017764919	0.34045	0.78078
Cluster-7604.0	Cluster-7604.0	Cluster-7604.0;orf1	0.42319349	0.017769564	-1.4823	0.63196
Cluster-7486.0	Cluster-7486.0	Cluster-7486.0;orf1	0.290687038	0.01781426	-0.34748	0.85526
Cluster-6735.0	Cluster-6735.0	Cluster-6735.0;	-0.784532528	0.017827386	-5.6705	0.0046789
Cluster-11264.1	Cluster-11264.1	Cluster-11264.1;orf1	-0.632403496	0.017891605	-1.7689	0.36605
Cluster-4389.12398	Cluster-4389.12398	Cluster-4389.12398;orf1	-1.095643459	0.017915378	0.64645	0.41482
Cluster-16146.0	Cluster-16146.0	Cluster-16146.0;orf1	0.61197955	0.017956315	-4.2316	0.00018369
Cluster-21193.0	Cluster-21193.0	Cluster-21193.0;orf1	-1.003761919	0.018041636	-3.5988	0.024679
Cluster-6543.0	Cluster-6543.0	Cluster-6543.0;orf1	1.59019629	0.018051687	1.9827	0.17442
Cluster-4389.2847	Cluster-4389.2847	Cluster-4389.2847;orf1	0.204006956	0.018111531	-0.34792	0.61853
Cluster-4389.3184	Cluster-4389.3184	Cluster-4389.3184;orf1	-0.349441725	0.018151907	0.59687	0.62555
Cluster-4389.2598	Cluster-4389.2598	Cluster-4389.2598;orf1	0.161908777	0.018159478	0.86702	0.28759
Cluster-17554.0	Cluster-17554.0	Cluster-17554.0;orf1	-1.146893347	0.018168491	-2.6243	0.057625
Cluster-14289.0	Cluster-14289.0	Cluster-14289.0;	-0.629751859	0.018208512	-4.5112	0.1829
Cluster-4389.13080	Cluster-4389.13080	Cluster-4389.13080;orf1	1.149559541	0.018290804	6.9744	5.85E-14
Cluster-6746.0	Cluster-6746.0	Cluster-6746.0;orf1	0.294646063	0.018350679	-2.4036	0.36366
Cluster-4389.5505	Cluster-4389.5505	Cluster-4389.5505;orf1	2.420963614	0.018367331	11.351	6.06E-16
Cluster-20278.0	Cluster-20278.0	Cluster-20278.0;orf1	-0.833636242	0.018379245	-1.8355	0.28144
Cluster-4389.14038	Cluster-4389.14038	Cluster-4389.14038;orf1	0.85154359	0.018420663	0.57304	0.34077
Cluster-4389.7430	Cluster-4389.7430	Cluster-4389.7430;orf1	0.643611724	0.018430175	2.4252	0.019015
Cluster-20296.0	Cluster-20296.0	Cluster-20296.0;orf1	0.396356217	0.018447806	0.92541	0.29496
Cluster-19724.0	Cluster-19724.0	Cluster-19724.0;orf1	-0.456924054	0.018453092	-1.1873	0.38424
Cluster-12122.0	Cluster-12122.0	Cluster-12122.0;orf1	0.779171514	0.018464747	-1.6215	0.36763
Cluster-22107.0	Cluster-22107.0	Cluster-22107.0;orf1	1.37881541	0.018486104	-0.75114	0.60626
Cluster-4389.13051	Cluster-4389.13051	Cluster-4389.13051;orf1	1.424036073	0.018504589	8.1766	5.66E-13
Cluster-4389.15533	Cluster-4389.15533	Cluster-4389.15533;orf1	0.498857361	0.018519179	0.41515	0.50696
Cluster-4389.5579	Cluster-4389.5579	Cluster-4389.5579;orf1	0.620674597	0.018583713	3.0279	0.018532
Cluster-8479.0	Cluster-8479.0	Cluster-8479.0;orf1	0.433675492	0.018587737	-1.9905	0.27201
Cluster-15867.0	Cluster-15867.0	Cluster-15867.0;orf1	-0.19989761	0.018598054	-0.16763	0.89052
Cluster-4389.11745	Cluster-4389.11745	Cluster-4389.11745;orf1	0.60708376	0.018605791	-0.11078	0.87049
Cluster-4389.174	Cluster-4389.174	Cluster-4389.174;orf1	-1.321342704	0.018607269	-0.33394	0.84452
Cluster-15032.0	Cluster-15032.0	Cluster-15032.0;orf1	-0.664875248	0.01863124	-3.9233	0.056833
Cluster-4389.12712	Cluster-4389.12712	Cluster-4389.12712;orf1	0.303815269	0.01864128	2.0232	0.13789
Cluster-19938.0	Cluster-19938.0	Cluster-19938.0;orf1	-0.642898213	0.018666167	0.087558	0.9163
Cluster-4389.1029	Cluster-4389.1029	Cluster-4389.1029;orf1	0.533517626	0.01868539	0.23741	0.78831
Cluster-17205.0	Cluster-17205.0	Cluster-17205.0;orf1	0.371270652	0.018694982	0.87568	0.36383
Cluster-4389.4224	Cluster-4389.4224	Cluster-4389.4224;orf1	0.07171424	0.018737432	0.88498	0.46387
Cluster-21457.0	Cluster-21457.0	Cluster-21457.0;orf1	-0.926246195	0.01874256	-2.7566	0.043304
Cluster-4389.12652	Cluster-4389.12652	Cluster-4389.12652;orf1	-0.580321119	0.018767818	-0.55434	0.5157
Cluster-4389.11027	Cluster-4389.11027	Cluster-4389.11027;	0.643160272	0.018919925	0.6031	0.34697
Cluster-10245.0	Cluster-10245.0	Cluster-10245.0;orf1	-0.394181661	0.018937423	2.2553	0.11737
Cluster-17431.0	Cluster-17431.0	Cluster-17431.0;	-1.180987561	0.018946429	0.012584	0.99749
Cluster-14393.0	Cluster-14393.0	Cluster-14393.0;	-0.259788632	0.019003443	-2.9289	0.32465
Cluster-20293.0	Cluster-20293.0	Cluster-20293.0;orf1	-0.334436793	0.019063496	-1.5711	0.07927
Cluster-4389.3088	Cluster-4389.3088	Cluster-4389.3088;orf1	0.4446983	0.01910707	3.014	0.03372
Cluster-12128.0	Cluster-12128.0	Cluster-12128.0;orf1	-0.276868836	0.019111356	-0.24294	0.85594
Cluster-4389.11955	Cluster-4389.11955	Cluster-4389.11955;orf2	1.308808039	0.019119618	6.4181	3.12E-12
Cluster-20149.0	Cluster-20149.0	Cluster-20149.0;orf1	0.188727982	0.019140212	1.4762	0.043707
Cluster-16071.0	Cluster-16071.0	Cluster-16071.0;orf1	0.326439032	0.019188651	0.30004	0.66536
Cluster-5808.0	Cluster-5808.0	Cluster-5808.0;orf1	-0.712111421	0.019257509	1.055	0.78952
Cluster-15973.0	Cluster-15973.0	Cluster-15973.0;orf1	0.331986282	0.019261959	0.27967	0.73312
Cluster-15954.0	Cluster-15954.0	Cluster-15954.0;orf1	0.932006284	0.019301381	0.71094	0.44731
Cluster-4389.13926	Cluster-4389.13926	Cluster-4389.13926;orf1	-0.718103189	0.019325691	1.8345	0.095831
Cluster-4389.4053	Cluster-4389.4053	Cluster-4389.4053;orf1	-0.755764077	0.019351429	0.97014	0.53439
Cluster-16902.0	Cluster-16902.0	Cluster-16902.0;orf1	0.265549815	0.019360253	1.1371	0.12381
Cluster-16428.0	Cluster-16428.0	Cluster-16428.0;orf1	-0.738907311	0.019395704	-5.2202	4.21E-06
Cluster-7796.0	Cluster-7796.0	Cluster-7796.0;orf1	0.403195133	0.019454196	0.77061	0.51175
Cluster-4389.16379	Cluster-4389.16379	Cluster-4389.16379;orf1	-0.597911646	0.019475744	-1.2939	0.053893
Cluster-4389.10156	Cluster-4389.10156	Cluster-4389.10156;orf1	0.722011228	0.019557695	1.4344	0.028337
Cluster-4389.10151	Cluster-4389.10151	Cluster-4389.10151;orf1	0.463985339	0.019607416	0.57621	0.57931
Cluster-13595.1	Cluster-13595.1	Cluster-13595.1;orf1	0.361560098	0.019680962	-0.68884	0.61248
Cluster-6214.0	Cluster-6214.0	Cluster-6214.0;	-0.572031729	0.019733301	-1.9171	0.47746
Cluster-4389.11652	Cluster-4389.11652	Cluster-4389.11652;orf1	0.555751865	0.019755197	1.8282	0.072856
Cluster-1543.0	Cluster-1543.0	Cluster-1543.0;orf1	0.582482674	0.01982892	1.2828	0.7451
Cluster-4389.15167	Cluster-4389.15167	Cluster-4389.15167;orf1	0.428553053	0.019832947	-1.9186	0.29644
Cluster-9373.0	Cluster-9373.0	Cluster-9373.0;	-0.526911416	0.019902666	-3.5269	0.31134
Cluster-21804.0	Cluster-21804.0	Cluster-21804.0;orf1	0.513346403	0.01990585	0.88639	0.3526
Cluster-4389.5949	Cluster-4389.5949	Cluster-4389.5949;orf1	0.546531889	0.019949573	-0.35906	0.77086
Cluster-15262.1	Cluster-15262.1	Cluster-15262.1;	-0.415267723	0.019971528	-3.3313	0.0059086
Cluster-4389.5271	Cluster-4389.5271	Cluster-4389.5271;orf1	0.63503173	0.020009996	2.1985	0.040687
Cluster-11611.0	Cluster-11611.0	Cluster-11611.0;orf1	-0.525558214	0.020021748	0.064116	0.98224
Cluster-11270.0	Cluster-11270.0	Cluster-11270.0;	-0.595396946	0.020022874	-2.8916	0.46899
Cluster-4389.3660	Cluster-4389.3660	Cluster-4389.3660;orf1	0.346494673	0.020081986	-0.030819	0.96371
Cluster-20371.0	Cluster-20371.0	Cluster-20371.0;orf1	1.209247045	0.020093523	2.0083	0.19176
Cluster-4389.15727	Cluster-4389.15727	Cluster-4389.15727;orf1	-0.696213615	0.02013263	-1.6574	0.044371
Cluster-6859.0	Cluster-6859.0	Cluster-6859.0;orf1	1.016621695	0.020213182	-1.8925	0.15324
Cluster-4389.3349	Cluster-4389.3349	Cluster-4389.3349;orf1	-1.196092193	0.020233679	-3.1456	0.0004092
Cluster-4264.0	Cluster-4264.0	Cluster-4264.0;orf1	0.652076697	0.020243253	1.5495	0.67748
Cluster-8452.0	Cluster-8452.0	Cluster-8452.0;orf1	1.009357135	0.020259033	0.25583	0.93914
Cluster-4389.16239	Cluster-4389.16239	Cluster-4389.16239;	1.431357806	0.020373011	5.2421	4.15E-07
Cluster-19816.0	Cluster-19816.0	Cluster-19816.0;orf1	-0.285996388	0.020376238	0.31814	0.69888
Cluster-4389.11926	Cluster-4389.11926	Cluster-4389.11926;orf1	0.540486803	0.020435755	0.29525	0.76065
Cluster-9121.0	Cluster-9121.0	Cluster-9121.0;orf1	0.292457518	0.02046602	0.46003	0.80881
Cluster-4216.0	Cluster-4216.0	Cluster-4216.0;orf1	-0.51959905	0.020566067	1.9935	0.56046
Cluster-21643.0	Cluster-21643.0	Cluster-21643.0;orf1	1.16942473	0.020579752	0.95184	0.24707
Cluster-21315.0	Cluster-21315.0	Cluster-21315.0;orf1	-0.535347466	0.020597756	-2.6388	0.0041707
Cluster-4389.996	Cluster-4389.996	Cluster-4389.996;orf1	-1.470512209	0.020633981	-3.954	0.0010858
Cluster-4389.9289	Cluster-4389.9289	Cluster-4389.9289;orf1	0.668326262	0.020646184	3.3611	0.00018485
Cluster-7179.0	Cluster-7179.0	Cluster-7179.0;orf1	-0.467224169	0.020669334	-4.3544	0.16768
Cluster-6483.0	Cluster-6483.0	Cluster-6483.0;orf1	-0.491162332	0.020674579	-3.6824	0.13241
Cluster-4389.11465	Cluster-4389.11465	Cluster-4389.11465;orf1	1.387850585	0.020687472	3.2065	0.00058879
Cluster-4389.14753	Cluster-4389.14753	Cluster-4389.14753;orf1	-0.094446595	0.020703255	-1.6021	0.68693
Cluster-4389.11583	Cluster-4389.11583	Cluster-4389.11583;orf1	-0.873222601	0.020724743	-3.2389	1.45E-05
Cluster-4389.16048	Cluster-4389.16048	Cluster-4389.16048;orf1	0.507030349	0.020728731	1.7825	0.184
Cluster-20742.0	Cluster-20742.0	Cluster-20742.0;orf1	0.330845498	0.020762883	-0.35916	0.69875
Cluster-4389.14434	Cluster-4389.14434	Cluster-4389.14434;orf1	0.36369923	0.020779791	0.66817	0.55045
Cluster-7613.0	Cluster-7613.0	Cluster-7613.0;orf1	-0.425714153	0.020803068	0.73574	0.78473
Cluster-4389.3627	Cluster-4389.3627	Cluster-4389.3627;	-0.479033418	0.020822911	0.89994	0.53414
Cluster-4389.8222	Cluster-4389.8222	Cluster-4389.8222;orf1	-0.514426952	0.020832197	-0.85308	0.17477
Cluster-4389.16517	Cluster-4389.16517	Cluster-4389.16517;orf1	0.893732689	0.02090174	0.25331	0.89743
Cluster-4389.14522	Cluster-4389.14522	Cluster-4389.14522;orf1	0.630449531	0.02093988	0.28252	0.72909
Cluster-4389.15831	Cluster-4389.15831	Cluster-4389.15831;orf1	0.37509614	0.020946662	0.025482	0.97744
Cluster-4389.7712	Cluster-4389.7712	Cluster-4389.7712;orf1	0.529676608	0.021035265	0.78659	0.21092
Cluster-22016.0	Cluster-22016.0	Cluster-22016.0;orf1	0.943649146	0.021085335	-0.32617	0.76819
Cluster-4389.11273	Cluster-4389.11273	Cluster-4389.11273;orf1	1.192302191	0.021121898	2.2956	0.0037146
Cluster-5005.0	Cluster-5005.0	Cluster-5005.0;	-0.976505322	0.021129221	1.8076	0.6459
Cluster-4389.11468	Cluster-4389.11468	Cluster-4389.11468;orf1	-1.181467849	0.021163352	0.87796	0.19115
Cluster-4389.5685	Cluster-4389.5685	Cluster-4389.5685;orf1	-0.497957098	0.021176036	-0.42382	0.55994
Cluster-4389.2155	Cluster-4389.2155	Cluster-4389.2155;orf1	0.47634962	0.021247224	0.84824	0.17646
Cluster-16147.0	Cluster-16147.0	Cluster-16147.0;	0.368569989	0.021255816	2.7225	0.057924
Cluster-7075.0	Cluster-7075.0	Cluster-7075.0;orf1	0.635141744	0.021271714	-0.48341	0.81486
Cluster-16978.0	Cluster-16978.0	Cluster-16978.0;orf1	-1.408854279	0.021309327	-1.164	0.38193
Cluster-11272.1	Cluster-11272.1	Cluster-11272.1;	-0.657484501	0.021365904	-3.5269	0.31134
Cluster-19470.0	Cluster-19470.0	Cluster-19470.0;orf1	-0.403800527	0.021457129	1.3426	0.2525
Cluster-11410.0	Cluster-11410.0	Cluster-11410.0;orf1	-0.659393352	0.021519949	0.12107	0.95707
Cluster-4389.15379	Cluster-4389.15379	Cluster-4389.15379;orf1	0.653946634	0.021523378	4.9344	0.0010238
Cluster-4389.12625	Cluster-4389.12625	Cluster-4389.12625;orf1	0.514919971	0.021570893	1.3086	0.093308
Cluster-13528.1	Cluster-13528.1	Cluster-13528.1;	1.123637617	0.021578981	2.2898	0.5375
Cluster-8236.0	Cluster-8236.0	Cluster-8236.0;orf1	-0.459985508	0.021619273	-2.2545	0.40519
Cluster-18651.0	Cluster-18651.0	Cluster-18651.0;orf1	0.408770741	0.021632352	0.39998	0.5975
Cluster-4389.16630	Cluster-4389.16630	Cluster-4389.16630;orf1	-0.415696698	0.021754575	-0.4092	0.51692
Cluster-4389.11956	Cluster-4389.11956	Cluster-4389.11956;orf1	-0.215225961	0.021819996	4.794	5.67E-09
Cluster-4389.9708	Cluster-4389.9708	Cluster-4389.9708;orf1	0.266534519	0.021935041	-0.67744	0.41493
Cluster-18532.0	Cluster-18532.0	Cluster-18532.0;orf1	-0.542810947	0.021987403	-0.69724	0.43889
Cluster-4389.14011	Cluster-4389.14011	Cluster-4389.14011;orf1	0.985244754	0.022012076	3.0907	0.00060321
Cluster-4389.14177	Cluster-4389.14177	Cluster-4389.14177;orf1	-0.414354761	0.022025922	-1.2168	0.20134
Cluster-17178.0	Cluster-17178.0	Cluster-17178.0;orf1	-0.827565827	0.022047232	-3.9405	0.10081
Cluster-11103.0	Cluster-11103.0	Cluster-11103.0;orf1	0.711987939	0.022063185	-0.44831	0.69531
Cluster-6704.0	Cluster-6704.0	Cluster-6704.0;orf1	-1.480636593	0.022117369	-1.8641	0.46253
Cluster-14329.0	Cluster-14329.0	Cluster-14329.0;	0.273799815	0.022127963	-1.3729	0.63597
Cluster-10332.0	Cluster-10332.0	Cluster-10332.0;	-0.805124542	0.022206241	-0.93069	0.81259
Cluster-4389.13970	Cluster-4389.13970	Cluster-4389.13970;orf1	0.889677904	0.022219513	1.5442	0.031035
Cluster-11373.0	Cluster-11373.0	Cluster-11373.0;orf1	0.678019511	0.022269413	-2.1968	0.39711
Cluster-4389.4757	Cluster-4389.4757	Cluster-4389.4757;orf1	1.019592543	0.022284996	6.1981	0.00034075
Cluster-4389.16726	Cluster-4389.16726	Cluster-4389.16726;orf1	0.761656264	0.022333909	1.6836	0.45719
Cluster-4389.3486	Cluster-4389.3486	Cluster-4389.3486;orf1	-0.669936973	0.022336375	0.65469	0.60305
Cluster-20294.0	Cluster-20294.0	Cluster-20294.0;orf1	-1.325035678	0.022349934	-2.8989	0.003684
Cluster-19187.0	Cluster-19187.0	Cluster-19187.0;orf1	-0.585775974	0.022375036	0.08536	0.94355
Cluster-4389.872	Cluster-4389.872	Cluster-4389.872;orf1	-0.338920431	0.022455449	-2.2553	0.21168
Cluster-4717.0	Cluster-4717.0	Cluster-4717.0;	0.710592821	0.022529234	1.4693	0.70928
Cluster-4389.2035	Cluster-4389.2035	Cluster-4389.2035;	-0.629717676	0.022534185	-0.81584	0.58877
Cluster-16926.0	Cluster-16926.0	Cluster-16926.0;orf1	-1.182252399	0.022547503	-2.825	0.0019583
Cluster-17856.0	Cluster-17856.0	Cluster-17856.0;orf1	0.478188958	0.022632137	0.26551	0.7479
Cluster-13287.0	Cluster-13287.0	Cluster-13287.0;orf1	0.144021981	0.022665724	3.1267	NA
Cluster-4389.11617	Cluster-4389.11617	Cluster-4389.11617;orf1	0.928341232	0.022697042	0.7776	0.62525
Cluster-10524.0	Cluster-10524.0	Cluster-10524.0;orf1	0.578985506	0.022733291	-0.81844	0.74432
Cluster-8549.0	Cluster-8549.0	Cluster-8549.0;orf1	0.810060258	0.022753654	0.62237	0.59135
Cluster-4389.2571	Cluster-4389.2571	Cluster-4389.2571;orf1	-0.606188696	0.022760995	-1.0722	0.086236
Cluster-4389.16529	Cluster-4389.16529	Cluster-4389.16529;orf1	-0.366027381	0.022766105	0.010798	0.98985
Cluster-19907.0	Cluster-19907.0	Cluster-19907.0;orf1	-0.969971205	0.022831185	-1.3468	0.28311
Cluster-7237.0	Cluster-7237.0	Cluster-7237.0;orf1	-0.521815248	0.022849532	0.10924	0.96287
Cluster-4389.13088	Cluster-4389.13088	Cluster-4389.13088;orf1	1.21317802	0.022908281	4.7361	6.50E-10
Cluster-4389.15140	Cluster-4389.15140	Cluster-4389.15140;orf1	0.195044788	0.022935793	-2.0698	0.098739
Cluster-4389.11987	Cluster-4389.11987	Cluster-4389.11987;orf1	-0.263457753	0.022966334	1.772	0.013494
Cluster-4389.10005	Cluster-4389.10005	Cluster-4389.10005;orf1	-0.613376693	0.023015738	-1.1976	0.24976
Cluster-4389.6446	Cluster-4389.6446	Cluster-4389.6446;orf1	-0.3595745	0.023028822	-0.2012	0.80737
Cluster-11563.0	Cluster-11563.0	Cluster-11563.0;	0.909511976	0.02303625	-0.14153	0.96059
Cluster-4389.13566	Cluster-4389.13566	Cluster-4389.13566;orf1	0.532761602	0.023053617	1.9119	0.1154
Cluster-17643.0	Cluster-17643.0	Cluster-17643.0;orf1	1.521162662	0.023096374	3.5001	8.56E-05
Cluster-4389.13671	Cluster-4389.13671	Cluster-4389.13671;orf1	0.550081989	0.023099686	1.4468	0.013299
Cluster-19100.0	Cluster-19100.0	Cluster-19100.0;orf1	0.543017482	0.023103699	0.39543	NA
Cluster-4389.9219	Cluster-4389.9219	Cluster-4389.9219;orf1	-0.202714067	0.023116021	-1.0955	0.25862
Cluster-18263.0	Cluster-18263.0	Cluster-18263.0;orf1	-0.976708812	0.023135625	-3.5739	7.23E-07
Cluster-4389.8029	Cluster-4389.8029	Cluster-4389.8029;orf1	0.382169733	0.023145995	-0.53788	0.66368
Cluster-17767.0	Cluster-17767.0	Cluster-17767.0;orf1	0.237656574	0.023172156	0.58975	0.52005
Cluster-4389.10660	Cluster-4389.10660	Cluster-4389.10660;orf1	0.882804654	0.023207443	2.3194	0.00046436
Cluster-4389.5079	Cluster-4389.5079	Cluster-4389.5079;orf1	0.662739105	0.023286455	-0.016857	0.98216
Cluster-4389.12696	Cluster-4389.12696	Cluster-4389.12696;orf1	0.529958979	0.023301545	0.62804	0.41615
Cluster-4389.1586	Cluster-4389.1586	Cluster-4389.1586;orf1	1.212157265	0.023303964	3.759	1.09E-05
Cluster-20599.1	Cluster-20599.1	Cluster-20599.1;orf1	0.678794035	0.023343536	2.5413	0.39196
Cluster-4389.11203	Cluster-4389.11203	Cluster-4389.11203;orf1	1.367900058	0.023413925	6.8341	1.27E-08
Cluster-9918.0	Cluster-9918.0	Cluster-9918.0;orf1	-0.61969161	0.02359671	-2.916	0.15076
Cluster-4389.3443	Cluster-4389.3443	Cluster-4389.3443;	0.355896462	0.023637472	2.3447	NA
Cluster-4389.2085	Cluster-4389.2085	Cluster-4389.2085;orf1	0.610797359	0.023641235	1.0736	0.15051
Cluster-21970.0	Cluster-21970.0	Cluster-21970.0;orf1	0.751791255	0.023660445	0.74344	0.35329
Cluster-7766.0	Cluster-7766.0	Cluster-7766.0;orf1	0.830216822	0.023686975	6.8671	1.26E-06
Cluster-13926.0	Cluster-13926.0	Cluster-13926.0;orf1	0.380549123	0.023690487	0.84294	0.71843
Cluster-18374.0	Cluster-18374.0	Cluster-18374.0;orf1	0.529457122	0.023731842	0.55425	0.65045
Cluster-86.0	Cluster-86.0	Cluster-86.0;orf1	-0.706169941	0.023752801	0.68111	0.86362
Cluster-4389.11063	Cluster-4389.11063	Cluster-4389.11063;orf1	0.418697173	0.023783698	0.25538	0.71741
Cluster-17227.0	Cluster-17227.0	Cluster-17227.0;orf1	-0.58163649	0.023784389	2.1609	0.019543
Cluster-14641.0	Cluster-14641.0	Cluster-14641.0;orf1	-0.548618461	0.023872316	-1.5221	0.52303
Cluster-21834.0	Cluster-21834.0	Cluster-21834.0;	-0.163075212	0.023887238	-3.9667	0.16322
Cluster-20601.0	Cluster-20601.0	Cluster-20601.0;orf1	-0.339461474	0.02395481	-0.48142	0.57421
Cluster-12248.0	Cluster-12248.0	Cluster-12248.0;orf1	0.476560615	0.024134538	2.062	0.082267
Cluster-160.0	Cluster-160.0	Cluster-160.0;orf1	-0.356069367	0.024209356	0.57013	0.8858
Cluster-4389.14831	Cluster-4389.14831	Cluster-4389.14831;orf1	-0.358695291	0.024222009	-0.34378	0.6308
Cluster-20757.0	Cluster-20757.0	Cluster-20757.0;orf1	-0.268237686	0.024269761	-0.81039	0.26428
Cluster-4389.2956	Cluster-4389.2956	Cluster-4389.2956;orf1	0.552670686	0.024276227	1.9944	0.0061167
Cluster-4389.8680	Cluster-4389.8680	Cluster-4389.8680;orf1	0.441279457	0.0242872	0.49786	0.54164
Cluster-10890.0	Cluster-10890.0	Cluster-10890.0;	-0.846418681	0.024326324	-1.6454	0.5789
Cluster-4389.8715	Cluster-4389.8715	Cluster-4389.8715;orf1	-0.612677052	0.024332987	-2.7251	0.00013168
Cluster-4389.600	Cluster-4389.600	Cluster-4389.600;orf1	-0.349396486	0.02433747	0.25386	0.75509
Cluster-4389.3966	Cluster-4389.3966	Cluster-4389.3966;orf1	0.620192308	0.024349439	0.53868	0.42929
Cluster-4389.6707	Cluster-4389.6707	Cluster-4389.6707;orf1	0.571833922	0.024371792	0.4049	0.81059
Cluster-4389.11103	Cluster-4389.11103	Cluster-4389.11103;orf1	0.414029781	0.024386122	1.0644	0.076797
Cluster-7398.0	Cluster-7398.0	Cluster-7398.0;	-0.779377517	0.0244677	-1.9388	0.48387
Cluster-4389.12200	Cluster-4389.12200	Cluster-4389.12200;orf1	0.865605454	0.024479171	5.5442	1.28E-12
Cluster-7259.0	Cluster-7259.0	Cluster-7259.0;orf1	-0.194738285	0.024502199	1.7358	0.22078
Cluster-15610.0	Cluster-15610.0	Cluster-15610.0;orf1	-0.422796634	0.024634476	-0.52966	0.53776
Cluster-10691.0	Cluster-10691.0	Cluster-10691.0;	-0.723361661	0.024752235	-1.804	NA
Cluster-4389.679	Cluster-4389.679	Cluster-4389.679;orf1	-0.403566564	0.024823525	0.60981	0.63719
Cluster-6748.1	Cluster-6748.1	Cluster-6748.1;orf1	0.796355923	0.024856304	4.913	0.0094908
Cluster-4389.11591	Cluster-4389.11591	Cluster-4389.11591;orf1	0.426239005	0.024903741	0.80742	0.18054
Cluster-5636.0	Cluster-5636.0	Cluster-5636.0;	1.18925648	0.024928995	1.1678	0.76743
Cluster-4389.11385	Cluster-4389.11385	Cluster-4389.11385;orf1	0.497086061	0.024942943	0.68109	0.29551
Cluster-4389.4866	Cluster-4389.4866	Cluster-4389.4866;orf1	0.888110004	0.024954326	1.654	0.033769
Cluster-4389.13032	Cluster-4389.13032	Cluster-4389.13032;orf1	0.95904959	0.025002316	-0.079319	0.90077
Cluster-8620.0	Cluster-8620.0	Cluster-8620.0;	0.463705748	0.025004371	-0.64338	0.77338
Cluster-4389.1887	Cluster-4389.1887	Cluster-4389.1887;orf1	-0.690397065	0.025032989	-0.20834	0.85702
Cluster-19292.0	Cluster-19292.0	Cluster-19292.0;orf1	-0.414693714	0.025057033	-0.86011	0.37999
Cluster-4389.10231	Cluster-4389.10231	Cluster-4389.10231;orf1	0.632423336	0.025125857	-0.30198	0.71241
Cluster-4389.9685	Cluster-4389.9685	Cluster-4389.9685;orf1	1.203564472	0.025147471	2.8311	0.054668
Cluster-4389.7828	Cluster-4389.7828	Cluster-4389.7828;orf1	0.881611187	0.025148078	1.4655	0.36964
Cluster-4389.7646	Cluster-4389.7646	Cluster-4389.7646;orf1	-1.123803476	0.02515209	-1.954	0.14131
Cluster-21019.0	Cluster-21019.0	Cluster-21019.0;orf1	-0.319382697	0.02516014	-1.2058	0.11669
Cluster-4389.12087	Cluster-4389.12087	Cluster-4389.12087;orf2	1.074314911	0.025194327	3.7181	0.0032926
Cluster-4389.7484	Cluster-4389.7484	Cluster-4389.7484;orf1	0.368094967	0.025220913	-1.1516	0.18569
Cluster-5379.0	Cluster-5379.0	Cluster-5379.0;	-0.479817254	0.025232483	2.7534	0.40417
Cluster-17873.0	Cluster-17873.0	Cluster-17873.0;orf1	0.294749283	0.025239394	1.3357	0.057762
Cluster-4389.4131	Cluster-4389.4131	Cluster-4389.4131;orf1	0.334670329	0.025329567	0.66133	0.29126
Cluster-4389.5357	Cluster-4389.5357	Cluster-4389.5357;orf1	0.288201688	0.025403933	0.12597	0.83619
Cluster-19373.1	Cluster-19373.1	Cluster-19373.1;	-0.692992078	0.025494999	-1.1004	0.69853
Cluster-16665.2	Cluster-16665.2	Cluster-16665.2;orf1	-0.385131586	0.025516023	1.1388	0.16555
Cluster-4389.11246	Cluster-4389.11246	Cluster-4389.11246;orf1	-0.329159664	0.025534294	-1.2938	0.38132
Cluster-4389.11683	Cluster-4389.11683	Cluster-4389.11683;orf1	0.705116072	0.025580634	0.33783	0.62172
Cluster-10172.0	Cluster-10172.0	Cluster-10172.0;orf1	1.695362487	0.02566654	3.8767	0.0084843
Cluster-20857.0	Cluster-20857.0	Cluster-20857.0;	-0.347522469	0.025725319	-1.3108	0.52183
Cluster-4389.12573	Cluster-4389.12573	Cluster-4389.12573;orf1	0.263261066	0.025807959	1.2861	0.082186
Cluster-19040.0	Cluster-19040.0	Cluster-19040.0;orf1	0.096585294	0.025812187	-0.41897	0.69653
Cluster-14572.0	Cluster-14572.0	Cluster-14572.0;orf1	0.617710069	0.025876528	1.2628	0.31373
Cluster-4389.16144	Cluster-4389.16144	Cluster-4389.16144;	0.362477328	0.025891217	0.82123	0.55833
Cluster-4389.9766	Cluster-4389.9766	Cluster-4389.9766;orf1	-0.381609005	0.02589635	-2.3595	0.0084935
Cluster-15306.0	Cluster-15306.0	Cluster-15306.0;orf1	-0.939243951	0.025940757	-0.20251	0.84494
Cluster-9022.0	Cluster-9022.0	Cluster-9022.0;orf1	0.500087876	0.025950126	1.352	0.61677
Cluster-12228.0	Cluster-12228.0	Cluster-12228.0;orf1	0.437612463	0.026008025	-0.21755	0.88829
Cluster-4389.1555	Cluster-4389.1555	Cluster-4389.1555;orf1	-0.51885666	0.026098948	-2.148	0.0040829
Cluster-17826.0	Cluster-17826.0	Cluster-17826.0;orf1	-0.371001841	0.026148421	0.82681	0.33452
Cluster-4389.14545	Cluster-4389.14545	Cluster-4389.14545;orf1	0.507029529	0.026268704	0.33978	0.57485
Cluster-4389.8592	Cluster-4389.8592	Cluster-4389.8592;	-0.763243287	0.026274264	-3.9686	0.00039757
Cluster-16893.0	Cluster-16893.0	Cluster-16893.0;orf1	-0.509103612	0.026284753	0.20614	0.85358
Cluster-7584.1	Cluster-7584.1	Cluster-7584.1;orf1	-0.35236277	0.026320996	0.5312	0.86725
Cluster-4389.7764	Cluster-4389.7764	Cluster-4389.7764;orf1	-0.250812989	0.026335778	0.45823	0.58423
Cluster-4389.15361	Cluster-4389.15361	Cluster-4389.15361;orf1	0.782186528	0.026354168	-3.3487	0.063857
Cluster-4389.15058	Cluster-4389.15058	Cluster-4389.15058;orf1	1.551416817	0.026355674	2.1088	0.57962
Cluster-21395.0	Cluster-21395.0	Cluster-21395.0;orf1	-0.633680378	0.026362797	1.4051	0.64924
Cluster-4389.6640	Cluster-4389.6640	Cluster-4389.6640;orf2	0.398939542	0.02636959	0.89937	0.43807
Cluster-18416.0	Cluster-18416.0	Cluster-18416.0;	-0.706589128	0.026408639	-3.6857	0.073933
Cluster-5789.0	Cluster-5789.0	Cluster-5789.0;orf1	-0.411440651	0.026452143	-2.9345	0.25825
Cluster-4389.3086	Cluster-4389.3086	Cluster-4389.3086;orf1	0.501903244	0.026455764	0.041352	0.97814
Cluster-4389.4574	Cluster-4389.4574	Cluster-4389.4574;orf1	1.192097831	0.02650527	6.1577	2.25E-06
Cluster-15250.0	Cluster-15250.0	Cluster-15250.0;orf1	-0.487482982	0.026516104	-0.48092	0.56718
Cluster-21751.0	Cluster-21751.0	Cluster-21751.0;orf1	-0.495311095	0.026545737	-1.3699	0.063933
Cluster-11111.0	Cluster-11111.0	Cluster-11111.0;	0.977491214	0.026577504	1.1644	0.55941
Cluster-13178.0	Cluster-13178.0	Cluster-13178.0;orf1	-0.432849697	0.02665694	0.8377	0.55291
Cluster-4389.10558	Cluster-4389.10558	Cluster-4389.10558;orf1	0.396222526	0.026689876	3.7362	0.075274
Cluster-4389.5142	Cluster-4389.5142	Cluster-4389.5142;orf1	0.961975406	0.026713841	0.86884	0.21595
Cluster-4389.13267	Cluster-4389.13267	Cluster-4389.13267;orf1	-0.263341021	0.026740068	0.59481	0.57752
Cluster-4389.8383	Cluster-4389.8383	Cluster-4389.8383;orf1	-0.821642073	0.026748782	-0.14252	0.85646
Cluster-13873.0	Cluster-13873.0	Cluster-13873.0;	-0.310621228	0.02675949	0.90114	0.75981
Cluster-4389.741	Cluster-4389.741	Cluster-4389.741;orf1	0.575568223	0.026797862	1.3118	0.15139
Cluster-4389.2108	Cluster-4389.2108	Cluster-4389.2108;orf1	0.650972235	0.026806697	-0.212	0.83073
Cluster-4389.1122	Cluster-4389.1122	Cluster-4389.1122;orf1	0.359989468	0.026830592	-2.1551	0.011122
Cluster-4389.13166	Cluster-4389.13166	Cluster-4389.13166;orf1	1.37034324	0.026839214	1.9775	0.041715
Cluster-8963.0	Cluster-8963.0	Cluster-8963.0;orf1	1.035868653	0.026864556	1.1483	0.71965
Cluster-9614.0	Cluster-9614.0	Cluster-9614.0;orf1	-1.597620577	0.026874002	1.6972	0.44708
Cluster-20991.0	Cluster-20991.0	Cluster-20991.0;orf1	-0.203862905	0.026880748	0.92227	0.50588
Cluster-11149.0	Cluster-11149.0	Cluster-11149.0;orf1	0.676923725	0.026886752	-3.1626	0.033464
Cluster-4389.9840	Cluster-4389.9840	Cluster-4389.9840;orf1	0.48236222	0.026930943	1.5687	0.24332
Cluster-20583.0	Cluster-20583.0	Cluster-20583.0;orf1	0.362904695	0.026958959	0.10207	0.90584
Cluster-17150.0	Cluster-17150.0	Cluster-17150.0;orf1	1.147781128	0.026969273	0.0065774	0.99436
Cluster-13286.0	Cluster-13286.0	Cluster-13286.0;	0.152808843	0.026997302	-3.7039	0.060543
Cluster-16510.0	Cluster-16510.0	Cluster-16510.0;orf1	-1.11846346	0.02701468	-1.2795	0.027375
Cluster-8833.0	Cluster-8833.0	Cluster-8833.0;orf1	0.5247399	0.027032213	0.90706	0.75803
Cluster-4389.15001	Cluster-4389.15001	Cluster-4389.15001;orf1	1.049009701	0.027034699	0.59441	0.44054
Cluster-4389.12199	Cluster-4389.12199	Cluster-4389.12199;orf1	0.54638656	0.027070768	2.7203	0.0020808
Cluster-10680.0	Cluster-10680.0	Cluster-10680.0;orf1	-0.649011479	0.02707948	-1.5193	0.34474
Cluster-4389.11127	Cluster-4389.11127	Cluster-4389.11127;orf1	-0.477333877	0.027202029	-1.154	0.12101
Cluster-12154.0	Cluster-12154.0	Cluster-12154.0;orf1	0.471911201	0.027202184	-1.9229	0.36025
Cluster-4389.16488	Cluster-4389.16488	Cluster-4389.16488;orf1	0.808013371	0.027234857	1.8737	0.037642
Cluster-4389.4947	Cluster-4389.4947	Cluster-4389.4947;orf1	-0.410582009	0.027235263	-2.3539	0.0014632
Cluster-4389.4578	Cluster-4389.4578	Cluster-4389.4578;orf1	1.109143122	0.027241914	4.3743	3.03E-05
Cluster-4389.7938	Cluster-4389.7938	Cluster-4389.7938;orf1	0.726859877	0.027253465	0.49236	0.61701
Cluster-7804.0	Cluster-7804.0	Cluster-7804.0;	0.777206507	0.027386595	0.72675	0.78341
Cluster-17292.0	Cluster-17292.0	Cluster-17292.0;	-0.157477286	0.027465975	-6.9494	3.65E-05
Cluster-5833.0	Cluster-5833.0	Cluster-5833.0;	-0.377435445	0.027500167	-4.6027	0.058441
Cluster-4389.5322	Cluster-4389.5322	Cluster-4389.5322;orf1	1.032097448	0.027564643	6.2499	1.78E-08
Cluster-4389.7141	Cluster-4389.7141	Cluster-4389.7141;	0.649324464	0.027583903	1.932	0.0059684
Cluster-4389.3872	Cluster-4389.3872	Cluster-4389.3872;orf1	0.327902292	0.027635565	-0.60323	0.69794
Cluster-4389.9569	Cluster-4389.9569	Cluster-4389.9569;orf1	0.489368278	0.027639184	0.83517	0.23465
Cluster-16318.0	Cluster-16318.0	Cluster-16318.0;orf1	-0.419571322	0.027786573	-1.1511	0.12837
Cluster-20611.3	Cluster-20611.3	Cluster-20611.3;	-1.31344628	0.027820733	-7.9864	3.43E-05
Cluster-4389.11364	Cluster-4389.11364	Cluster-4389.11364;orf1	-0.61710814	0.027827369	0.92284	0.2512
Cluster-4389.16624	Cluster-4389.16624	Cluster-4389.16624;orf1	0.606525793	0.027833617	1.3447	0.07591
Cluster-18063.0	Cluster-18063.0	Cluster-18063.0;orf1	-0.473793891	0.027845327	-4.7646	0.0056064
Cluster-15184.0	Cluster-15184.0	Cluster-15184.0;orf1	0.395208121	0.027914809	1.4574	0.053422
Cluster-4389.7149	Cluster-4389.7149	Cluster-4389.7149;orf1	-0.442838847	0.027968879	-2.177	0.19335
Cluster-4389.13997	Cluster-4389.13997	Cluster-4389.13997;orf1	0.493212736	0.027974147	1.3992	0.43934
Cluster-4389.6257	Cluster-4389.6257	Cluster-4389.6257;orf1	-0.364633365	0.028004658	-0.44375	0.51927
Cluster-20640.0	Cluster-20640.0	Cluster-20640.0;orf1	-0.635679385	0.02801161	0.29538	0.85294
Cluster-4389.1480	Cluster-4389.1480	Cluster-4389.1480;orf1	1.033739936	0.028136312	4.0205	0.0044723
Cluster-18334.2	Cluster-18334.2	Cluster-18334.2;orf1	-0.656273263	0.028193113	-2.1579	0.046662
Cluster-15935.0	Cluster-15935.0	Cluster-15935.0;	-0.841302254	0.028246279	-4.5667	0.0093089
Cluster-4389.989	Cluster-4389.989	Cluster-4389.989;orf1	0.361006316	0.028360138	-0.14229	0.83856
Cluster-18729.0	Cluster-18729.0	Cluster-18729.0;orf1	0.517752888	0.028381463	-1.7579	0.050125
Cluster-4389.5773	Cluster-4389.5773	Cluster-4389.5773;orf1	0.524614466	0.028425272	8.1691	1.83E-08
Cluster-4389.3671	Cluster-4389.3671	Cluster-4389.3671;orf1	0.884422173	0.028427428	0.88065	0.2545
Cluster-4389.3016	Cluster-4389.3016	Cluster-4389.3016;orf1	0.866067014	0.028602527	3.472	3.68E-05
Cluster-4389.11865	Cluster-4389.11865	Cluster-4389.11865;orf1	2.963832068	0.028649064	1.1961	0.43816
Cluster-4389.10210	Cluster-4389.10210	Cluster-4389.10210;orf1	0.848116083	0.028665093	1.3997	0.069667
Cluster-4389.1041	Cluster-4389.1041	Cluster-4389.1041;orf1	-0.175556907	0.028687337	0.21433	0.73124
Cluster-4389.1021	Cluster-4389.1021	Cluster-4389.1021;orf1	-0.702081386	0.028700952	0.12249	0.91766
Cluster-4389.16482	Cluster-4389.16482	Cluster-4389.16482;orf1	0.460645048	0.028771708	1.9491	0.026948
Cluster-4389.12412	Cluster-4389.12412	Cluster-4389.12412;orf1	2.228449932	0.028782961	6.7793	7.97E-19
Cluster-4389.16757	Cluster-4389.16757	Cluster-4389.16757;orf1	0.495853735	0.028825568	-0.53326	0.59436
Cluster-8921.0	Cluster-8921.0	Cluster-8921.0;	0.437136105	0.028894453	0.4181	0.84472
Cluster-20262.0	Cluster-20262.0	Cluster-20262.0;orf1	-0.562711119	0.028910969	-0.74345	0.26967
Cluster-4389.1866	Cluster-4389.1866	Cluster-4389.1866;	0.477497259	0.028925427	4.8504	0.0018692
Cluster-4389.1754	Cluster-4389.1754	Cluster-4389.1754;orf1	0.654406443	0.028931285	0.33547	0.66027
Cluster-19606.0	Cluster-19606.0	Cluster-19606.0;orf1	1.634953064	0.02909079	4.0815	9.92E-06
Cluster-20800.0	Cluster-20800.0	Cluster-20800.0;orf1	-0.175940522	0.029093301	0.64222	0.3758
Cluster-12934.0	Cluster-12934.0	Cluster-12934.0;orf1	0.270174361	0.029135523	-1.0975	0.74189
Cluster-4389.4379	Cluster-4389.4379	Cluster-4389.4379;orf2	1.362752428	0.029136012	5.4233	2.22E-09
Cluster-17916.0	Cluster-17916.0	Cluster-17916.0;orf1	0.816748486	0.029148996	2.5162	0.051535
Cluster-4389.1703	Cluster-4389.1703	Cluster-4389.1703;	0.622453042	0.029163867	3.9081	0.14349
Cluster-17550.0	Cluster-17550.0	Cluster-17550.0;orf1	-0.424789256	0.029166362	0.63045	0.58252
Cluster-4389.6854	Cluster-4389.6854	Cluster-4389.6854;orf1	-0.291038649	0.02916924	-0.14876	0.90139
Cluster-4389.10812	Cluster-4389.10812	Cluster-4389.10812;orf1	-0.337067562	0.029180236	-1.0872	0.40216
Cluster-4389.14759	Cluster-4389.14759	Cluster-4389.14759;orf1	1.201750992	0.029281835	-0.58227	0.4792
Cluster-15304.0	Cluster-15304.0	Cluster-15304.0;orf1	-0.675741334	0.02937899	-2.5803	0.28871
Cluster-4389.6406	Cluster-4389.6406	Cluster-4389.6406;orf1	0.298052119	0.029387213	0.80168	0.45658
Cluster-21297.0	Cluster-21297.0	Cluster-21297.0;orf1	-0.782585903	0.029434818	-0.47065	0.85915
Cluster-4389.16791	Cluster-4389.16791	Cluster-4389.16791;orf1	1.160311929	0.029469309	7.5282	1.40E-08
Cluster-4389.2016	Cluster-4389.2016	Cluster-4389.2016;orf1	0.526768568	0.02948421	1.4789	0.30733
Cluster-19401.0	Cluster-19401.0	Cluster-19401.0;orf1	0.552539334	0.029541162	-0.26967	0.82389
Cluster-19404.0	Cluster-19404.0	Cluster-19404.0;orf1	-0.666132545	0.029602147	-0.686	0.65941
Cluster-4389.4057	Cluster-4389.4057	Cluster-4389.4057;orf1	1.216380495	0.029627872	2.9388	0.00015437
Cluster-21101.0	Cluster-21101.0	Cluster-21101.0;orf1	-0.569688137	0.029718535	-0.47819	0.52094
Cluster-4389.5737	Cluster-4389.5737	Cluster-4389.5737;orf1	0.388685869	0.029756284	0.13605	0.87786
Cluster-13391.0	Cluster-13391.0	Cluster-13391.0;	0.091118892	0.029810643	-4.0453	0.23042
Cluster-18094.0	Cluster-18094.0	Cluster-18094.0;orf1	0.662384511	0.029895157	1.4772	0.038448
Cluster-20711.0	Cluster-20711.0	Cluster-20711.0;orf1	0.308145502	0.029904626	-0.59508	0.68513
Cluster-4389.12868	Cluster-4389.12868	Cluster-4389.12868;orf1	0.243158117	0.029941225	2.2352	0.09475
Cluster-4389.11074	Cluster-4389.11074	Cluster-4389.11074;orf1	1.420206222	0.029947256	11.229	1.51E-17
Cluster-20211.0	Cluster-20211.0	Cluster-20211.0;orf1	-0.233331544	0.030045226	0.17474	0.8104
Cluster-18301.0	Cluster-18301.0	Cluster-18301.0;	0.604148855	0.030118765	-2.8632	0.21985
Cluster-4389.14195	Cluster-4389.14195	Cluster-4389.14195;orf1	1.172367036	0.030214346	2.9059	1.21E-05
Cluster-4389.11925	Cluster-4389.11925	Cluster-4389.11925;orf1	0.834934843	0.030232049	2.5881	0.0011026
Cluster-4389.16421	Cluster-4389.16421	Cluster-4389.16421;	2.002960355	0.030273092	8.0017	1.56E-07
Cluster-21795.0	Cluster-21795.0	Cluster-21795.0;orf1	0.388110822	0.030282497	-0.74421	0.35185
Cluster-4389.6197	Cluster-4389.6197	Cluster-4389.6197;orf1	0.717340334	0.030325367	3.5494	0.0011315
Cluster-4389.15715	Cluster-4389.15715	Cluster-4389.15715;orf1	0.662731359	0.030401177	4.1829	0.010527
Cluster-19044.0	Cluster-19044.0	Cluster-19044.0;orf1	-0.872772854	0.030452196	-2.7438	0.000296
Cluster-13455.0	Cluster-13455.0	Cluster-13455.0;	1.057333175	0.030463123	0.44109	0.89039
Cluster-15787.0	Cluster-15787.0	Cluster-15787.0;orf1	-0.204645675	0.030465247	0.40221	0.7446
Cluster-6878.0	Cluster-6878.0	Cluster-6878.0;	-0.940624312	0.030473615	-1.7828	0.62519
Cluster-4389.11222	Cluster-4389.11222	Cluster-4389.11222;orf1	1.396291281	0.030485106	3.9361	7.85E-06
Cluster-4389.9218	Cluster-4389.9218	Cluster-4389.9218;orf1	0.252997783	0.030490913	2.4422	0.010406
Cluster-4389.14115	Cluster-4389.14115	Cluster-4389.14115;orf1	0.934119881	0.030526386	1.4171	0.12405
Cluster-17825.0	Cluster-17825.0	Cluster-17825.0;orf1	0.816682222	0.030534312	1.6537	0.067849
Cluster-4389.5163	Cluster-4389.5163	Cluster-4389.5163;orf1	1.347965535	0.030560408	1.6299	0.26146
Cluster-15367.0	Cluster-15367.0	Cluster-15367.0;	-0.868687546	0.030567718	-1.9515	0.3842
Cluster-21190.0	Cluster-21190.0	Cluster-21190.0;orf1	-0.675016342	0.030703443	-2.0321	0.30676
Cluster-4389.11800	Cluster-4389.11800	Cluster-4389.11800;orf1	-0.418928415	0.030709177	-0.81859	0.23688
Cluster-7353.0	Cluster-7353.0	Cluster-7353.0;orf1	-0.422828254	0.030731393	-2.0302	0.61103
Cluster-14456.0	Cluster-14456.0	Cluster-14456.0;orf1	0.230063949	0.030781389	-0.36697	0.7655
Cluster-4389.10688	Cluster-4389.10688	Cluster-4389.10688;orf1	0.96465403	0.030813248	1.9019	0.0019477
Cluster-4389.12344	Cluster-4389.12344	Cluster-4389.12344;orf1	1.421490347	0.030819934	4.8506	1.11E-07
Cluster-18396.0	Cluster-18396.0	Cluster-18396.0;orf1	-0.411998792	0.030983803	-0.88727	0.39727
Cluster-16894.0	Cluster-16894.0	Cluster-16894.0;orf1	-0.363103193	0.03117155	-1.4399	0.10915
Cluster-9170.0	Cluster-9170.0	Cluster-9170.0;orf1	1.181301555	0.031182086	6.8397	1.61E-08
Cluster-3733.0	Cluster-3733.0	Cluster-3733.0;	0.543660093	0.031236041	2.4522	0.48505
Cluster-4389.2883	Cluster-4389.2883	Cluster-4389.2883;orf1	0.792190004	0.031290233	1.1085	0.18431
Cluster-4389.6334	Cluster-4389.6334	Cluster-4389.6334;orf1	1.015405375	0.031345975	-0.45033	0.67335
Cluster-10752.0	Cluster-10752.0	Cluster-10752.0;orf1	0.698922606	0.031386749	1.268	0.35484
Cluster-15155.0	Cluster-15155.0	Cluster-15155.0;orf1	-0.241719964	0.031393961	-3.0531	0.1526
Cluster-1862.0	Cluster-1862.0	Cluster-1862.0;orf1	-0.385605819	0.0314326	3.0913	0.3129
Cluster-18246.0	Cluster-18246.0	Cluster-18246.0;orf1	0.513154582	0.031484488	0.26748	0.69101
Cluster-4389.2746	Cluster-4389.2746	Cluster-4389.2746;orf1	-1.010677553	0.031551384	-3.771	0.025934
Cluster-4389.9992	Cluster-4389.9992	Cluster-4389.9992;orf1	-0.403238709	0.031600646	0.98389	NA
Cluster-13332.1	Cluster-13332.1	Cluster-13332.1;	-1.160260358	0.031606464	0.52543	0.89475
Cluster-20927.0	Cluster-20927.0	Cluster-20927.0;orf1	-0.421596153	0.031610692	0.78778	0.36597
Cluster-16139.0	Cluster-16139.0	Cluster-16139.0;orf1	0.655380706	0.031625329	0.51697	0.63518
Cluster-4389.628	Cluster-4389.628	Cluster-4389.628;orf1	0.637232278	0.031634496	0.73217	0.7646
Cluster-4389.6523	Cluster-4389.6523	Cluster-4389.6523;orf1	0.371172536	0.031641483	-0.25537	0.80755
Cluster-4389.7783	Cluster-4389.7783	Cluster-4389.7783;orf1	0.243640155	0.031671449	8.619	4.46E-12
Cluster-4389.72	Cluster-4389.72	Cluster-4389.72;orf1	0.342760521	0.031767852	-0.39068	0.55208
Cluster-4389.14725	Cluster-4389.14725	Cluster-4389.14725;orf1	-0.297367823	0.031790672	-0.42171	0.81572
Cluster-4389.5813	Cluster-4389.5813	Cluster-4389.5813;orf1	1.016272904	0.031939051	1.6253	0.049519
Cluster-12080.2	Cluster-12080.2	Cluster-12080.2;orf1	0.706268797	0.031965002	5.8917	0.00039223
Cluster-4389.7366	Cluster-4389.7366	Cluster-4389.7366;orf1	0.550534065	0.032038176	1.6475	0.065395
Cluster-4389.16384	Cluster-4389.16384	Cluster-4389.16384;orf1	0.35333433	0.032086649	0.59743	0.52774
Cluster-4389.14757	Cluster-4389.14757	Cluster-4389.14757;orf1	-0.464491388	0.03209108	0.12971	0.88699
Cluster-4389.13878	Cluster-4389.13878	Cluster-4389.13878;orf1	0.35472161	0.032108562	-0.17812	0.81636
Cluster-4389.3571	Cluster-4389.3571	Cluster-4389.3571;orf1	-0.416618337	0.032122307	-1.7767	0.070651
Cluster-4389.12145	Cluster-4389.12145	Cluster-4389.12145;orf1	0.614416128	0.032149423	-0.60679	0.63036
Cluster-4389.15227	Cluster-4389.15227	Cluster-4389.15227;orf1	1.474680172	0.032163982	3.6347	0.11079
Cluster-4389.12197	Cluster-4389.12197	Cluster-4389.12197;orf1	1.608048869	0.032165839	5.5735	9.94E-15
Cluster-4389.11767	Cluster-4389.11767	Cluster-4389.11767;orf2	-0.918356492	0.032196646	-1.2578	0.062171
Cluster-4389.15095	Cluster-4389.15095	Cluster-4389.15095;orf1	0.329294228	0.032238096	-2.7493	0.013433
Cluster-5830.0	Cluster-5830.0	Cluster-5830.0;orf1	-0.946940462	0.03227178	-3.1341	0.33929
Cluster-4389.6294	Cluster-4389.6294	Cluster-4389.6294;orf1	0.772802441	0.032272649	2.3603	0.047818
Cluster-19954.1	Cluster-19954.1	Cluster-19954.1;orf1	0.613071219	0.03232854	2.1641	0.070679
Cluster-4389.3098	Cluster-4389.3098	Cluster-4389.3098;	0.521024127	0.032436504	1.3102	0.089621
Cluster-10564.0	Cluster-10564.0	Cluster-10564.0;orf1	0.72982926	0.032480179	4.4391	1.05E-05
Cluster-21192.0	Cluster-21192.0	Cluster-21192.0;orf1	-0.341303943	0.032574438	-1.8718	0.21
Cluster-17750.0	Cluster-17750.0	Cluster-17750.0;	-1.26249555	0.032608747	-3.1321	0.0062664
Cluster-4389.12470	Cluster-4389.12470	Cluster-4389.12470;orf1	0.808638224	0.032634654	2.0361	0.0017269
Cluster-21958.0	Cluster-21958.0	Cluster-21958.0;orf1	-0.28326889	0.032655006	1.0834	0.47063
Cluster-20135.0	Cluster-20135.0	Cluster-20135.0;orf1	-0.566204843	0.032813524	-0.94109	0.25216
Cluster-4389.1377	Cluster-4389.1377	Cluster-4389.1377;	1.369937935	0.032860546	4.5451	0.062857
Cluster-19576.0	Cluster-19576.0	Cluster-19576.0;orf1	-0.456197183	0.032954987	-0.066015	0.95777
Cluster-4389.1584	Cluster-4389.1584	Cluster-4389.1584;orf1	0.403382032	0.033003963	2.5824	0.00021361
Cluster-18645.0	Cluster-18645.0	Cluster-18645.0;orf1	0.45348639	0.033023803	2.8798	0.0014066
Cluster-21277.1	Cluster-21277.1	Cluster-21277.1;orf1	-0.131792126	0.033139215	-0.94412	0.18978
Cluster-17135.2	Cluster-17135.2	Cluster-17135.2;orf1	0.494089543	0.033189808	3.2705	0.067227
Cluster-18224.0	Cluster-18224.0	Cluster-18224.0;orf1	0.456779064	0.03321043	0.53595	0.63881
Cluster-4389.4868	Cluster-4389.4868	Cluster-4389.4868;orf1	0.482790735	0.033218996	1.8582	0.016329
Cluster-18424.0	Cluster-18424.0	Cluster-18424.0;orf1	0.198031981	0.033231707	0.61786	0.40064
Cluster-4389.14090	Cluster-4389.14090	Cluster-4389.14090;orf1	0.752228236	0.033275423	-0.47106	0.53549
Cluster-4389.821	Cluster-4389.821	Cluster-4389.821;orf1	1.125281086	0.033291548	1.9541	0.3603
Cluster-16518.0	Cluster-16518.0	Cluster-16518.0;orf1	0.33050225	0.03333517	0.72813	0.44581
Cluster-6413.0	Cluster-6413.0	Cluster-6413.0;orf1	-0.615702526	0.033355507	-0.88922	0.55688
Cluster-13935.0	Cluster-13935.0	Cluster-13935.0;orf1	-0.393016101	0.033495347	0.014078	0.99592
Cluster-3838.0	Cluster-3838.0	Cluster-3838.0;orf1	0.195272333	0.033497334	1.4693	0.70928
Cluster-4389.12287	Cluster-4389.12287	Cluster-4389.12287;orf1	1.192336425	0.033549545	4.6603	8.41E-07
Cluster-4389.14145	Cluster-4389.14145	Cluster-4389.14145;orf2	1.29789159	0.033563699	7.9835	1.18E-08
Cluster-18909.0	Cluster-18909.0	Cluster-18909.0;orf1	-0.600868669	0.033593457	-1.2744	0.09246
Cluster-16288.0	Cluster-16288.0	Cluster-16288.0;orf1	-0.365174223	0.033685901	-2.017	0.034591
Cluster-12676.1	Cluster-12676.1	Cluster-12676.1;orf1	0.495920054	0.033710216	-2.3641	0.20139
Cluster-4389.5244	Cluster-4389.5244	Cluster-4389.5244;orf1	0.653998173	0.033738905	1.7078	0.015957
Cluster-4389.4795	Cluster-4389.4795	Cluster-4389.4795;orf1	0.591679702	0.033794949	6.7056	2.87E-05
Cluster-4389.11348	Cluster-4389.11348	Cluster-4389.11348;orf1	-0.561272841	0.033860959	1.3502	0.046245
Cluster-20014.0	Cluster-20014.0	Cluster-20014.0;orf1	-0.366636939	0.033984553	-0.32276	0.74574
Cluster-18956.0	Cluster-18956.0	Cluster-18956.0;orf1	-0.322094774	0.034024164	1.0826	0.40114
Cluster-4389.14321	Cluster-4389.14321	Cluster-4389.14321;orf1	-0.412229648	0.034036171	1.2594	0.1133
Cluster-11857.0	Cluster-11857.0	Cluster-11857.0;	-0.897881474	0.03404622	-1.6213	0.50314
Cluster-4389.7996	Cluster-4389.7996	Cluster-4389.7996;orf1	0.62402418	0.034049618	1.7144	0.13756
Cluster-4389.4912	Cluster-4389.4912	Cluster-4389.4912;orf1	0.44642022	0.034069584	4.9711	6.67E-10
Cluster-14196.0	Cluster-14196.0	Cluster-14196.0;	0.297959447	0.034095505	-0.3079	0.93111
Cluster-13194.0	Cluster-13194.0	Cluster-13194.0;orf1	0.40031305	0.03423773	2.2849	0.085851
Cluster-4389.16904	Cluster-4389.16904	Cluster-4389.16904;orf1	0.651777587	0.034249897	-0.016453	0.98525
Cluster-4389.6204	Cluster-4389.6204	Cluster-4389.6204;orf2	-0.50968164	0.034289176	-0.16473	0.81546
Cluster-12536.0	Cluster-12536.0	Cluster-12536.0;orf1	0.524363926	0.034302035	-0.31478	0.93035
Cluster-9512.0	Cluster-9512.0	Cluster-9512.0;orf1	-0.808571657	0.034304816	2.5677	0.14303
Cluster-15377.0	Cluster-15377.0	Cluster-15377.0;orf1	-0.1477002	0.034318846	0.8263	0.50039
Cluster-4389.4158	Cluster-4389.4158	Cluster-4389.4158;orf2	0.862765076	0.034325454	4.7057	0.00016158
Cluster-12397.0	Cluster-12397.0	Cluster-12397.0;	0.703711223	0.034351228	0.82917	0.78053
Cluster-13754.0	Cluster-13754.0	Cluster-13754.0;orf1	0.137086684	0.034353437	1.0737	0.67097
Cluster-4389.8348	Cluster-4389.8348	Cluster-4389.8348;orf1	-0.737292347	0.034394671	-0.038376	0.95497
Cluster-4389.2611	Cluster-4389.2611	Cluster-4389.2611;orf1	0.359360523	0.034403155	1.5074	0.051018
Cluster-9890.1	Cluster-9890.1	Cluster-9890.1;	-0.581907282	0.034439011	-4.7452	0.23836
Cluster-10064.0	Cluster-10064.0	Cluster-10064.0;	-0.539908139	0.034465141	-4.2647	0.030007
Cluster-19204.0	Cluster-19204.0	Cluster-19204.0;orf1	-0.667772526	0.03449696	-3.1348	0.00041318
Cluster-4389.4263	Cluster-4389.4263	Cluster-4389.4263;	0.539736363	0.034559523	0.84613	0.40132
Cluster-15260.0	Cluster-15260.0	Cluster-15260.0;orf1	-0.59003349	0.034566066	-0.2876	0.73595
Cluster-15298.0	Cluster-15298.0	Cluster-15298.0;orf1	-0.230418715	0.034612202	1.4549	0.080538
Cluster-4389.7625	Cluster-4389.7625	Cluster-4389.7625;orf1	-0.348444784	0.034637813	-1.334	0.2608
Cluster-4389.5439	Cluster-4389.5439	Cluster-4389.5439;orf1	-0.588849119	0.034718271	-0.82698	0.22762
Cluster-12619.1	Cluster-12619.1	Cluster-12619.1;	0.550124341	0.034721736	-2.9466	0.42068
Cluster-4389.5655	Cluster-4389.5655	Cluster-4389.5655;orf1	0.466271222	0.034783586	0.75079	0.26944
Cluster-4389.6705	Cluster-4389.6705	Cluster-4389.6705;orf1	-0.614565472	0.03480818	-1.8798	0.081989
Cluster-19904.0	Cluster-19904.0	Cluster-19904.0;orf1	0.539479731	0.035019464	0.74542	0.46607
Cluster-8645.0	Cluster-8645.0	Cluster-8645.0;	0.345677665	0.035121262	-2.9647	0.45952
Cluster-4389.12348	Cluster-4389.12348	Cluster-4389.12348;orf1	1.571243504	0.035125389	5.3972	4.12E-15
Cluster-4389.15643	Cluster-4389.15643	Cluster-4389.15643;orf1	1.180791737	0.035138848	2.7561	0.0028817
Cluster-4394.0	Cluster-4394.0	Cluster-4394.0;orf1	1.540132719	0.035181255	1.3171	0.73847
Cluster-20034.0	Cluster-20034.0	Cluster-20034.0;orf1	-0.242797356	0.035183517	-0.51314	0.49636
Cluster-15990.0	Cluster-15990.0	Cluster-15990.0;	0.097167973	0.03522204	-2.6713	0.096639
Cluster-14154.0	Cluster-14154.0	Cluster-14154.0;orf1	-0.175536997	0.035252592	-2.8003	0.4358
Cluster-4389.11486	Cluster-4389.11486	Cluster-4389.11486;orf1	1.01303649	0.035368955	3.6765	4.08E-06
Cluster-4389.1187	Cluster-4389.1187	Cluster-4389.1187;orf1	0.610454041	0.035461754	-0.39216	0.66256
Cluster-5301.1	Cluster-5301.1	Cluster-5301.1;	1.190375883	0.035522461	-0.072463	0.98346
Cluster-4389.7193	Cluster-4389.7193	Cluster-4389.7193;orf1	0.289886524	0.035589312	1.6184	0.017401
Cluster-4389.15063	Cluster-4389.15063	Cluster-4389.15063;	1.205991113	0.035591883	6.4659	9.02E-06
Cluster-4389.988	Cluster-4389.988	Cluster-4389.988;orf1	1.171560238	0.035692979	1.6372	0.22694
Cluster-9725.0	Cluster-9725.0	Cluster-9725.0;orf1	0.876792673	0.035729607	2.6218	0.098041
Cluster-4389.3498	Cluster-4389.3498	Cluster-4389.3498;orf1	-1.292453625	0.035761942	-1.3618	0.055826
Cluster-12495.0	Cluster-12495.0	Cluster-12495.0;	0.921876776	0.035777525	-0.84687	0.82987
Cluster-4389.14573	Cluster-4389.14573	Cluster-4389.14573;orf1	-0.21639156	0.035786976	0.60957	0.3452
Cluster-14267.0	Cluster-14267.0	Cluster-14267.0;orf1	0.267663425	0.035817622	-0.10807	0.97049
Cluster-4389.908	Cluster-4389.908	Cluster-4389.908;orf1	-0.657353182	0.03588131	-1.837	0.010761
Cluster-18881.0	Cluster-18881.0	Cluster-18881.0;orf1	-0.789084831	0.035882347	0.19785	0.8692
Cluster-4389.11919	Cluster-4389.11919	Cluster-4389.11919;orf1	2.369985275	0.035953763	2.5876	0.18292
Cluster-3494.0	Cluster-3494.0	Cluster-3494.0;	-0.721268173	0.03605117	2.1782	0.50664
Cluster-18117.0	Cluster-18117.0	Cluster-18117.0;orf1	0.23020742	0.03608937	2.0356	0.06955
Cluster-21081.0	Cluster-21081.0	Cluster-21081.0;orf1	-0.197212708	0.036115324	-0.60366	0.6004
Cluster-217.0	Cluster-217.0	Cluster-217.0;orf1	0.575564665	0.036123748	0.68111	0.86362
Cluster-4389.1273	Cluster-4389.1273	Cluster-4389.1273;orf1	1.193673929	0.036197551	2.1977	0.055281
Cluster-4389.2779	Cluster-4389.2779	Cluster-4389.2779;orf1	-0.263977533	0.03620697	-0.73573	0.40987
Cluster-4389.6427	Cluster-4389.6427	Cluster-4389.6427;orf1	-0.390903466	0.036217282	0.69902	0.32749
Cluster-4389.12951	Cluster-4389.12951	Cluster-4389.12951;orf1	0.49810166	0.036251201	8.9979	3.11E-10
Cluster-21749.0	Cluster-21749.0	Cluster-21749.0;orf1	0.33771769	0.036404407	-0.91994	0.1512
Cluster-20781.0	Cluster-20781.0	Cluster-20781.0;orf1	0.604636718	0.036409719	-2.3137	0.1618
Cluster-16447.0	Cluster-16447.0	Cluster-16447.0;orf1	-0.862970796	0.036439452	-2.2945	0.25547
Cluster-4389.1241	Cluster-4389.1241	Cluster-4389.1241;orf1	0.238704526	0.036444807	-0.67574	0.34621
Cluster-4389.3008	Cluster-4389.3008	Cluster-4389.3008;orf1	0.461565219	0.036466437	-0.56685	0.58805
Cluster-4389.13308	Cluster-4389.13308	Cluster-4389.13308;orf1	0.6192373	0.036546645	0.27966	0.7734
Cluster-4389.15052	Cluster-4389.15052	Cluster-4389.15052;orf1	0.748866027	0.03675458	1.3229	0.57025
Cluster-9960.1	Cluster-9960.1	Cluster-9960.1;orf1	-0.840510471	0.036767122	-1.7791	0.19783
Cluster-4389.6818	Cluster-4389.6818	Cluster-4389.6818;orf1	0.400530771	0.036837413	-0.72667	0.50382
Cluster-4389.4997	Cluster-4389.4997	Cluster-4389.4997;orf1	0.31931736	0.037012755	1.2398	0.28187
Cluster-4389.9194	Cluster-4389.9194	Cluster-4389.9194;orf1	-0.188717199	0.037013186	0.44665	0.47356
Cluster-21389.0	Cluster-21389.0	Cluster-21389.0;orf1	0.390810898	0.037163393	0.96801	0.18446
Cluster-15930.0	Cluster-15930.0	Cluster-15930.0;orf1	-0.132441008	0.037170368	-0.37592	0.67601
Cluster-5004.0	Cluster-5004.0	Cluster-5004.0;orf1	1.036150602	0.037302808	1.2017	0.76082
Cluster-4389.15656	Cluster-4389.15656	Cluster-4389.15656;orf1	0.635573731	0.037397044	1.7267	0.007271
Cluster-21898.0	Cluster-21898.0	Cluster-21898.0;orf2	1.04015936	0.037423297	4.5706	3.24E-09
Cluster-19294.0	Cluster-19294.0	Cluster-19294.0;orf1	-0.298538963	0.037476579	0.74209	0.52635
Cluster-4389.1212	Cluster-4389.1212	Cluster-4389.1212;orf1	0.282703846	0.037489793	-0.78732	0.37767
Cluster-4389.7865	Cluster-4389.7865	Cluster-4389.7865;orf1	0.775993394	0.037514887	-0.30776	0.6977
Cluster-17858.0	Cluster-17858.0	Cluster-17858.0;orf1	-1.18242792	0.037545598	0.098848	0.94156
Cluster-21460.0	Cluster-21460.0	Cluster-21460.0;orf1	0.60652579	0.037609369	0.54184	0.4563
Cluster-20132.0	Cluster-20132.0	Cluster-20132.0;orf1	-0.540616832	0.037636432	-0.65725	0.61616
Cluster-4389.15448	Cluster-4389.15448	Cluster-4389.15448;orf1	1.372851214	0.037696215	4.8551	7.66E-11
Cluster-4389.8946	Cluster-4389.8946	Cluster-4389.8946;orf1	0.339918583	0.03773365	0.76742	0.29406
Cluster-4389.15027	Cluster-4389.15027	Cluster-4389.15027;orf1	0.459596765	0.037769192	1.1369	0.082562
Cluster-4389.13951	Cluster-4389.13951	Cluster-4389.13951;orf1	-0.66858438	0.037835549	-1.2619	0.17938
Cluster-19383.0	Cluster-19383.0	Cluster-19383.0;orf1	-0.406942987	0.037861165	-0.74826	0.47477
Cluster-4389.13502	Cluster-4389.13502	Cluster-4389.13502;orf1	0.621351881	0.037873649	2.9783	0.0013466
Cluster-4389.5233	Cluster-4389.5233	Cluster-4389.5233;orf1	0.42166464	0.037914978	1.3159	0.026506
Cluster-4389.13771	Cluster-4389.13771	Cluster-4389.13771;orf1	1.107518731	0.037946012	1.6178	0.036075
Cluster-4389.12521	Cluster-4389.12521	Cluster-4389.12521;orf1	0.457254045	0.037971356	0.54721	0.45203
Cluster-19784.1	Cluster-19784.1	Cluster-19784.1;orf1	-0.672802468	0.038006813	-0.98363	0.48376
Cluster-1942.0	Cluster-1942.0	Cluster-1942.0;orf1	-0.533273024	0.038069442	2.171	0.55862
Cluster-15134.0	Cluster-15134.0	Cluster-15134.0;orf1	-0.604208416	0.03816541	-2.4214	0.019595
Cluster-4389.2556	Cluster-4389.2556	Cluster-4389.2556;orf1	0.403965849	0.038175425	0.35453	0.6997
Cluster-4389.4915	Cluster-4389.4915	Cluster-4389.4915;orf1	0.299572026	0.038182544	0.17324	0.80707
Cluster-4389.209	Cluster-4389.209	Cluster-4389.209;orf1	0.837584917	0.038246102	2.009	0.023669
Cluster-20419.0	Cluster-20419.0	Cluster-20419.0;orf1	1.184605547	0.038270914	3.0045	0.0011746
Cluster-4389.13738	Cluster-4389.13738	Cluster-4389.13738;	-0.493051682	0.03828686	0.50311	0.86392
Cluster-4389.4999	Cluster-4389.4999	Cluster-4389.4999;orf1	1.010107142	0.03849665	4.3472	7.20E-09
Cluster-16660.0	Cluster-16660.0	Cluster-16660.0;orf1	0.46727256	0.038513957	0.69113	0.43043
Cluster-4389.7309	Cluster-4389.7309	Cluster-4389.7309;orf1	1.17154261	0.038542827	1.9212	0.053428
Cluster-17164.0	Cluster-17164.0	Cluster-17164.0;orf1	-0.268064705	0.038622204	0.6704	0.56842
Cluster-16811.0	Cluster-16811.0	Cluster-16811.0;orf1	-0.308398224	0.038623857	0.66608	0.33693
Cluster-10221.0	Cluster-10221.0	Cluster-10221.0;orf1	-0.423686377	0.038629405	-6.2144	0.052093
Cluster-4389.14225	Cluster-4389.14225	Cluster-4389.14225;orf1	0.393036244	0.038641833	1.2547	0.13845
Cluster-4389.4707	Cluster-4389.4707	Cluster-4389.4707;orf1	1.519664481	0.038860152	6.6645	3.82E-05
Cluster-3403.0	Cluster-3403.0	Cluster-3403.0;	-1.055176707	0.038902568	1.5741	0.68942
Cluster-15837.0	Cluster-15837.0	Cluster-15837.0;orf1	2.031545987	0.038922558	0.25732	0.83897
Cluster-21699.0	Cluster-21699.0	Cluster-21699.0;orf1	-0.273791523	0.038964525	-1.1289	0.14926
Cluster-15097.0	Cluster-15097.0	Cluster-15097.0;orf1	0.22338946	0.038967774	0.67361	0.31928
Cluster-4389.4913	Cluster-4389.4913	Cluster-4389.4913;orf1	1.024995975	0.038977154	1.8933	0.0070833
Cluster-11562.0	Cluster-11562.0	Cluster-11562.0;orf1	-0.616204794	0.039099993	-0.26435	0.86645
Cluster-4389.12	Cluster-4389.12	Cluster-4389.12;orf1	1.230242693	0.039117038	4.6644	8.30E-07
Cluster-16298.0	Cluster-16298.0	Cluster-16298.0;orf1	-0.426463432	0.039128329	0.49301	0.55246
Cluster-9967.0	Cluster-9967.0	Cluster-9967.0;orf1	0.872200236	0.039139064	2.3413	0.056378
Cluster-4389.9333	Cluster-4389.9333	Cluster-4389.9333;orf1	0.415568716	0.039174462	1.3895	0.074708
Cluster-16812.0	Cluster-16812.0	Cluster-16812.0;orf1	-0.291299536	0.039385962	0.40454	0.61643
Cluster-4389.178	Cluster-4389.178	Cluster-4389.178;orf2	1.056932079	0.039446716	3.0349	0.0036664
Cluster-22105.0	Cluster-22105.0	Cluster-22105.0;orf1	1.086079393	0.039458196	-0.22903	0.88579
Cluster-4389.2195	Cluster-4389.2195	Cluster-4389.2195;orf1	-0.366104648	0.039501591	-1.2953	0.29544
Cluster-20772.0	Cluster-20772.0	Cluster-20772.0;orf1	-0.647240772	0.039512554	-1.8733	0.012392
Cluster-4389.4781	Cluster-4389.4781	Cluster-4389.4781;orf1	0.292287529	0.039551148	0.80346	0.31184
Cluster-4389.16787	Cluster-4389.16787	Cluster-4389.16787;orf1	0.673833394	0.039623714	-1.095	0.53232
Cluster-10074.0	Cluster-10074.0	Cluster-10074.0;orf1	0.634748086	0.039652313	3.699	0.0031191
Cluster-4389.14638	Cluster-4389.14638	Cluster-4389.14638;	-0.194721792	0.039696577	-2.5575	0.039918
Cluster-4389.16276	Cluster-4389.16276	Cluster-4389.16276;orf1	0.411688168	0.039697588	3.1724	0.0036347
Cluster-4389.3352	Cluster-4389.3352	Cluster-4389.3352;orf1	0.830249058	0.039725341	1.4915	0.3002
Cluster-21286.0	Cluster-21286.0	Cluster-21286.0;	-0.31558695	0.039736792	-4.9386	0.024293
Cluster-4389.12617	Cluster-4389.12617	Cluster-4389.12617;orf1	1.605426603	0.039761118	4.6015	0.0015873
Cluster-4389.16661	Cluster-4389.16661	Cluster-4389.16661;orf1	0.404964722	0.039808459	-0.0022105	0.99756
Cluster-15593.0	Cluster-15593.0	Cluster-15593.0;orf1	-0.651248117	0.039870545	0.56033	0.64701
Cluster-4389.566	Cluster-4389.566	Cluster-4389.566;orf1	-0.819874143	0.039932208	-1.0951	0.29688
Cluster-17501.0	Cluster-17501.0	Cluster-17501.0;orf1	-0.574287576	0.039939098	-1.2155	0.065971
Cluster-21110.0	Cluster-21110.0	Cluster-21110.0;orf1	-0.472615498	0.040015251	-0.68587	0.56824
Cluster-4389.16093	Cluster-4389.16093	Cluster-4389.16093;orf1	-1.510334556	0.040068427	-1.9226	0.28735
Cluster-4389.3585	Cluster-4389.3585	Cluster-4389.3585;orf1	1.457951749	0.040138459	4.5128	1.96E-08
Cluster-4389.2363	Cluster-4389.2363	Cluster-4389.2363;orf1	0.268069996	0.040155474	2.8335	0.00042644
Cluster-4389.4686	Cluster-4389.4686	Cluster-4389.4686;orf1	-0.429828812	0.040204191	-0.81197	0.27416
Cluster-4389.4049	Cluster-4389.4049	Cluster-4389.4049;orf1	0.411110859	0.040216754	0.019179	0.9751
Cluster-16347.1	Cluster-16347.1	Cluster-16347.1;orf1	-0.936806174	0.040265739	-1.5042	0.21368
Cluster-4389.12861	Cluster-4389.12861	Cluster-4389.12861;orf1	0.26164035	0.040286941	-0.87519	0.18927
Cluster-4389.5877	Cluster-4389.5877	Cluster-4389.5877;	0.573843444	0.040331982	2.9082	0.008389
Cluster-4389.14277	Cluster-4389.14277	Cluster-4389.14277;orf1	0.307893986	0.040488744	-0.37893	0.60016
Cluster-4389.3714	Cluster-4389.3714	Cluster-4389.3714;orf1	0.504222395	0.040499554	1.2219	0.2659
Cluster-4389.2544	Cluster-4389.2544	Cluster-4389.2544;orf1	1.091976326	0.040566983	4.3798	3.55E-05
Cluster-4389.11938	Cluster-4389.11938	Cluster-4389.11938;orf1	1.467588021	0.040571816	10.936	1.16E-14
Cluster-4389.5288	Cluster-4389.5288	Cluster-4389.5288;orf1	-0.716816061	0.040576902	1.5156	0.16125
Cluster-12640.0	Cluster-12640.0	Cluster-12640.0;orf1	-0.332264897	0.040590407	-0.11551	0.97068
Cluster-19754.0	Cluster-19754.0	Cluster-19754.0;orf1	-0.586655527	0.040632978	-1.3275	0.040474
Cluster-4389.6504	Cluster-4389.6504	Cluster-4389.6504;	-0.675168301	0.040682148	-0.97126	0.43125
Cluster-4389.12218	Cluster-4389.12218	Cluster-4389.12218;orf1	0.447282409	0.040737507	3.4295	0.0015419
Cluster-4389.8878	Cluster-4389.8878	Cluster-4389.8878;orf1	0.692322047	0.040843263	0.80349	0.25114
Cluster-4389.14280	Cluster-4389.14280	Cluster-4389.14280;orf1	0.412106143	0.040932588	1.6778	0.21861
Cluster-4389.5805	Cluster-4389.5805	Cluster-4389.5805;orf1	-0.284059909	0.041005164	6.8488	1.28E-12
Cluster-4389.8326	Cluster-4389.8326	Cluster-4389.8326;orf1	0.625955772	0.041061652	1.3293	0.17191
Cluster-18747.0	Cluster-18747.0	Cluster-18747.0;orf1	0.249652037	0.04107008	-1.1358	0.10746
Cluster-4389.3914	Cluster-4389.3914	Cluster-4389.3914;orf1	0.45783473	0.041109309	0.070391	0.94925
Cluster-6136.0	Cluster-6136.0	Cluster-6136.0;orf1	0.53647304	0.041172734	-1.9266	0.60012
Cluster-4389.6738	Cluster-4389.6738	Cluster-4389.6738;orf1	-0.923480979	0.041339191	-4.2342	0.00031459
Cluster-18098.1	Cluster-18098.1	Cluster-18098.1;	-1.043697024	0.041341124	-2.9805	0.10032
Cluster-4389.14612	Cluster-4389.14612	Cluster-4389.14612;orf1	1.053093361	0.041368359	3.6312	0.00015894
Cluster-4389.13603	Cluster-4389.13603	Cluster-4389.13603;orf1	-0.462316529	0.041387849	-0.36735	0.71537
Cluster-4389.15543	Cluster-4389.15543	Cluster-4389.15543;orf1	-0.304047183	0.04143323	0.43274	0.51811
Cluster-4389.2721	Cluster-4389.2721	Cluster-4389.2721;orf1	0.282389685	0.041443704	0.99425	0.49269
Cluster-4389.2811	Cluster-4389.2811	Cluster-4389.2811;orf1	-0.910802107	0.041500456	-0.94402	0.30739
Cluster-4389.5792	Cluster-4389.5792	Cluster-4389.5792;orf1	0.981742524	0.041545611	1.1802	0.16301
Cluster-21579.0	Cluster-21579.0	Cluster-21579.0;orf1	0.614217876	0.041579772	-0.20864	0.79465
Cluster-4389.14752	Cluster-4389.14752	Cluster-4389.14752;orf1	-0.168969231	0.04162227	4.0458	0.00047402
Cluster-4389.2697	Cluster-4389.2697	Cluster-4389.2697;orf1	0.148716125	0.041762846	1.2494	0.12361
Cluster-14645.0	Cluster-14645.0	Cluster-14645.0;orf1	-0.716576555	0.041786843	0.11451	0.9418
Cluster-3282.0	Cluster-3282.0	Cluster-3282.0;	0.405385485	0.041839428	0.99312	0.80169
Cluster-3943.0	Cluster-3943.0	Cluster-3943.0;	1.239863789	0.041887358	2.9232	0.35731
Cluster-15996.0	Cluster-15996.0	Cluster-15996.0;	-0.880852735	0.041892029	-2.446	0.071846
Cluster-19554.0	Cluster-19554.0	Cluster-19554.0;orf2	0.502007913	0.041966672	0.75214	0.37237
Cluster-19486.0	Cluster-19486.0	Cluster-19486.0;orf1	0.740612038	0.042002347	-0.15599	0.8864
Cluster-4389.7609	Cluster-4389.7609	Cluster-4389.7609;orf1	0.222897655	0.042047559	0.052292	0.9449
Cluster-20509.0	Cluster-20509.0	Cluster-20509.0;orf1	-0.396005844	0.042061055	-1.3808	0.53668
Cluster-18553.0	Cluster-18553.0	Cluster-18553.0;orf1	0.719908929	0.042102124	2.1505	0.011672
Cluster-4389.13586	Cluster-4389.13586	Cluster-4389.13586;orf1	0.348293448	0.042117046	0.45556	0.63295
Cluster-4389.13732	Cluster-4389.13732	Cluster-4389.13732;orf1	0.639462881	0.04212857	3.0908	0.046138
Cluster-4389.16082	Cluster-4389.16082	Cluster-4389.16082;orf1	-0.601036417	0.04215058	-0.97882	0.43701
Cluster-4389.15910	Cluster-4389.15910	Cluster-4389.15910;	-0.964027739	0.042153215	1.9398	0.032652
Cluster-19430.0	Cluster-19430.0	Cluster-19430.0;orf1	-0.276785939	0.042259102	1.3118	0.17716
Cluster-15574.0	Cluster-15574.0	Cluster-15574.0;orf1	-0.573747489	0.042285408	-1.4002	0.11655
Cluster-18596.0	Cluster-18596.0	Cluster-18596.0;orf1	-0.968113574	0.042301208	-12.166	2.66E-13
Cluster-4389.13524	Cluster-4389.13524	Cluster-4389.13524;orf1	1.079804394	0.042337449	4.1927	4.44E-06
Cluster-4389.5564	Cluster-4389.5564	Cluster-4389.5564;orf1	1.074303128	0.042407576	9.6252	1.42E-11
Cluster-17069.0	Cluster-17069.0	Cluster-17069.0;orf1	1.655375492	0.042408572	4.9585	1.10E-07
Cluster-4389.1340	Cluster-4389.1340	Cluster-4389.1340;	1.037396989	0.042491866	0.97291	0.49546
Cluster-18249.0	Cluster-18249.0	Cluster-18249.0;orf1	0.470010456	0.042493292	1.8648	0.029613
Cluster-20883.0	Cluster-20883.0	Cluster-20883.0;orf1	0.267279543	0.04252341	1.0491	0.15158
Cluster-11324.0	Cluster-11324.0	Cluster-11324.0;orf1	0.257479559	0.042611081	-3.4564	0.2223
Cluster-4389.6033	Cluster-4389.6033	Cluster-4389.6033;orf1	-0.240581911	0.042679765	-0.68635	0.3918
Cluster-5588.0	Cluster-5588.0	Cluster-5588.0;orf1	0.944747814	0.04271227	2.0437	0.53035
Cluster-4515.0	Cluster-4515.0	Cluster-4515.0;orf1	-0.409280783	0.042721249	3.644	0.11539
Cluster-21933.0	Cluster-21933.0	Cluster-21933.0;orf1	-0.160360307	0.042721575	0.43998	0.58482
Cluster-19662.0	Cluster-19662.0	Cluster-19662.0;orf1	0.365259702	0.04273219	-0.52221	0.85479
Cluster-4389.5819	Cluster-4389.5819	Cluster-4389.5819;orf1	0.552319371	0.042787301	-0.044556	0.97102
Cluster-9841.0	Cluster-9841.0	Cluster-9841.0;orf1	-0.584840347	0.04279859	-1.4257	0.57497
Cluster-9798.0	Cluster-9798.0	Cluster-9798.0;orf1	-0.222323189	0.042947425	0.35944	0.80701
Cluster-4389.16332	Cluster-4389.16332	Cluster-4389.16332;orf1	-0.644957064	0.042981199	-1.049	0.57097
Cluster-4389.11463	Cluster-4389.11463	Cluster-4389.11463;orf1	0.26618565	0.043018548	0.38476	0.62806
Cluster-4389.8922	Cluster-4389.8922	Cluster-4389.8922;orf1	-0.671296347	0.043088771	-0.80245	0.35084
Cluster-19976.1	Cluster-19976.1	Cluster-19976.1;orf1	0.451967656	0.043100609	1.0829	0.19289
Cluster-4389.7307	Cluster-4389.7307	Cluster-4389.7307;orf1	-0.721240516	0.043111313	-2.5918	0.025092
Cluster-4389.9903	Cluster-4389.9903	Cluster-4389.9903;orf1	-0.515921263	0.043139734	0.5242	0.56681
Cluster-7366.0	Cluster-7366.0	Cluster-7366.0;orf1	3.250554776	0.043188687	5.6897	2.09E-06
Cluster-4389.10297	Cluster-4389.10297	Cluster-4389.10297;orf1	-0.422736681	0.043223058	-1.3692	0.10271
Cluster-18499.0	Cluster-18499.0	Cluster-18499.0;orf1	-2.044296864	0.043228122	-5.0949	5.99E-07
Cluster-4389.16150	Cluster-4389.16150	Cluster-4389.16150;orf1	0.364004658	0.043326559	1.6105	0.014218
Cluster-4389.11395	Cluster-4389.11395	Cluster-4389.11395;orf1	0.862224769	0.043344233	2.7277	0.0010241
Cluster-1361.3	Cluster-1361.3	Cluster-1361.3;orf1	0.670569836	0.043379299	1.9569	0.39007
Cluster-17707.0	Cluster-17707.0	Cluster-17707.0;orf1	0.511650594	0.043404457	1.5333	0.038043
Cluster-4389.13107	Cluster-4389.13107	Cluster-4389.13107;orf1	1.024470266	0.043404789	2.3465	0.00014988
Cluster-20658.0	Cluster-20658.0	Cluster-20658.0;orf1	-0.31847819	0.04343132	-0.068009	0.96163
Cluster-4389.12264	Cluster-4389.12264	Cluster-4389.12264;orf1	0.585853191	0.043466548	0.20885	0.7622
Cluster-15302.0	Cluster-15302.0	Cluster-15302.0;orf1	0.699268208	0.043522939	4.4987	3.01E-05
Cluster-18296.0	Cluster-18296.0	Cluster-18296.0;orf1	0.910155699	0.04363969	1.2277	0.15542
Cluster-4389.12230	Cluster-4389.12230	Cluster-4389.12230;orf1	1.463027704	0.043654145	6.938	5.59E-09
Cluster-18072.0	Cluster-18072.0	Cluster-18072.0;orf1	-0.210019673	0.043711773	-0.13087	0.86832
Cluster-19024.0	Cluster-19024.0	Cluster-19024.0;orf1	0.869893231	0.043717017	0.85397	0.35924
Cluster-6701.0	Cluster-6701.0	Cluster-6701.0;orf1	0.510469037	0.043783903	5.6346	1.24E-06
Cluster-4389.8942	Cluster-4389.8942	Cluster-4389.8942;	0.478229375	0.043829378	-0.41488	0.70944
Cluster-3857.0	Cluster-3857.0	Cluster-3857.0;orf1	0.495500439	0.043880952	4.8513	0.012042
Cluster-17764.0	Cluster-17764.0	Cluster-17764.0;orf1	-1.26982665	0.043920893	-3.5121	2.78E-05
Cluster-14635.0	Cluster-14635.0	Cluster-14635.0;orf1	-0.420289746	0.043952182	1.0896	0.39433
Cluster-19371.0	Cluster-19371.0	Cluster-19371.0;orf1	0.305450767	0.043975333	0.10522	0.89995
Cluster-4389.13089	Cluster-4389.13089	Cluster-4389.13089;orf1	0.456547393	0.043980117	0.55483	0.39307
Cluster-4389.3112	Cluster-4389.3112	Cluster-4389.3112;orf1	-0.507763813	0.044019226	-0.85907	0.23734
Cluster-4389.14959	Cluster-4389.14959	Cluster-4389.14959;orf1	0.623352523	0.044058507	1.2883	0.076044
Cluster-4389.5125	Cluster-4389.5125	Cluster-4389.5125;orf1	-0.470844759	0.044061969	-1.8995	0.053808
Cluster-7183.0	Cluster-7183.0	Cluster-7183.0;orf1	0.758927828	0.044100741	-0.96237	0.74455
Cluster-4389.15081	Cluster-4389.15081	Cluster-4389.15081;	0.174675321	0.044114749	-0.94002	0.68351
Cluster-18737.0	Cluster-18737.0	Cluster-18737.0;orf1	0.785938986	0.04412222	1.2843	0.26921
Cluster-20222.1	Cluster-20222.1	Cluster-20222.1;orf1	-0.784049785	0.044126668	0.45097	0.90967
Cluster-4389.9825	Cluster-4389.9825	Cluster-4389.9825;orf1	1.207485858	0.044133739	2.5132	0.000139
Cluster-4389.6615	Cluster-4389.6615	Cluster-4389.6615;orf1	0.59707173	0.044148932	2.6787	0.0042038
Cluster-4389.5364	Cluster-4389.5364	Cluster-4389.5364;	1.139863311	0.044177135	2.9917	0.032708
Cluster-21909.0	Cluster-21909.0	Cluster-21909.0;orf1	0.27985824	0.044192363	0.76762	0.46462
Cluster-4389.5228	Cluster-4389.5228	Cluster-4389.5228;orf1	0.606680651	0.044333417	0.90069	0.3494
Cluster-4389.13967	Cluster-4389.13967	Cluster-4389.13967;orf1	1.176524887	0.044344815	-0.9041	0.48036
Cluster-4389.13689	Cluster-4389.13689	Cluster-4389.13689;orf1	0.394416434	0.044377839	-0.63689	0.62558
Cluster-19562.0	Cluster-19562.0	Cluster-19562.0;orf1	0.979607707	0.044392559	3.3475	3.49E-05
Cluster-4389.1970	Cluster-4389.1970	Cluster-4389.1970;orf1	0.254101958	0.044395313	0.96302	0.18951
Cluster-4389.15887	Cluster-4389.15887	Cluster-4389.15887;orf1	0.302266839	0.044453252	0.97849	0.31787
Cluster-4389.15695	Cluster-4389.15695	Cluster-4389.15695;orf1	0.338164258	0.044455623	0.54017	0.58407
Cluster-16635.0	Cluster-16635.0	Cluster-16635.0;orf1	-0.381581833	0.044510967	-0.58326	0.61229
Cluster-4389.11969	Cluster-4389.11969	Cluster-4389.11969;orf1	-0.607709614	0.044532797	0.094809	0.96081
Cluster-12653.0	Cluster-12653.0	Cluster-12653.0;orf1	0.534464617	0.044578289	2.2751	0.15219
Cluster-19192.0	Cluster-19192.0	Cluster-19192.0;orf1	-0.533551491	0.044606356	-1.6735	0.019704
Cluster-4389.14761	Cluster-4389.14761	Cluster-4389.14761;	0.248812489	0.04464489	-0.38062	0.78368
Cluster-4389.11749	Cluster-4389.11749	Cluster-4389.11749;orf1	-0.477700038	0.044655324	-0.15719	0.80942
Cluster-14916.0	Cluster-14916.0	Cluster-14916.0;orf1	-0.526394881	0.044835569	-0.51808	0.89588
Cluster-4389.661	Cluster-4389.661	Cluster-4389.661;orf1	0.420786138	0.044900782	0.81556	0.47807
Cluster-14217.0	Cluster-14217.0	Cluster-14217.0;orf1	0.259798124	0.045091035	2.5328	0.021336
Cluster-4389.1851	Cluster-4389.1851	Cluster-4389.1851;orf1	-0.280321399	0.045100483	1.3973	0.25062
Cluster-11048.0	Cluster-11048.0	Cluster-11048.0;orf1	0.504795694	0.045126521	-0.77111	0.59079
Cluster-18612.0	Cluster-18612.0	Cluster-18612.0;orf1	-0.24007251	0.045147119	1.3439	0.13382
Cluster-4389.3579	Cluster-4389.3579	Cluster-4389.3579;orf1	-0.413918263	0.045220419	1.7103	0.25874
Cluster-13074.0	Cluster-13074.0	Cluster-13074.0;orf1	0.662264122	0.045234459	-3.0955	0.1144
Cluster-9661.0	Cluster-9661.0	Cluster-9661.0;orf1	0.309907823	0.045250409	0.64323	0.70773
Cluster-4389.1144	Cluster-4389.1144	Cluster-4389.1144;orf1	0.408391113	0.045307965	1.5024	0.074272
Cluster-4389.5524	Cluster-4389.5524	Cluster-4389.5524;orf1	1.096585788	0.04537823	2.625	0.00019492
Cluster-20741.0	Cluster-20741.0	Cluster-20741.0;orf1	0.666890018	0.045378894	0.5528	0.6925
Cluster-13487.0	Cluster-13487.0	Cluster-13487.0;	-1.167378319	0.045400595	-5.6385	0.11957
Cluster-4389.11302	Cluster-4389.11302	Cluster-4389.11302;orf1	0.711966985	0.045492297	2.4181	0.081552
Cluster-660.0	Cluster-660.0	Cluster-660.0;	1.937395992	0.045531989	0.57013	0.8858
Cluster-4389.13014	Cluster-4389.13014	Cluster-4389.13014;	-0.725675393	0.045559139	-0.78324	0.51337
Cluster-4389.4765	Cluster-4389.4765	Cluster-4389.4765;orf1	-0.421423428	0.045569723	1.2338	0.48974
Cluster-4389.1827	Cluster-4389.1827	Cluster-4389.1827;orf1	-0.642262355	0.045587319	-1.3283	0.10694
Cluster-19046.0	Cluster-19046.0	Cluster-19046.0;orf1	-0.575283195	0.045590143	0.21455	0.8851
Cluster-7807.0	Cluster-7807.0	Cluster-7807.0;orf1	1.761009824	0.045676706	3.4124	0.02971
Cluster-4389.10401	Cluster-4389.10401	Cluster-4389.10401;orf1	0.53817594	0.04567685	-1.1618	0.057794
Cluster-18052.0	Cluster-18052.0	Cluster-18052.0;orf1	0.476125064	0.045677941	0.025711	0.97258
Cluster-4389.9571	Cluster-4389.9571	Cluster-4389.9571;orf1	1.122218092	0.045685163	0.75574	0.60937
Cluster-13861.0	Cluster-13861.0	Cluster-13861.0;orf1	-0.338654938	0.045823085	-4.0453	0.23042
Cluster-11518.0	Cluster-11518.0	Cluster-11518.0;orf1	-0.499702694	0.045858344	0.041768	0.97451
Cluster-6318.0	Cluster-6318.0	Cluster-6318.0;	-0.783504078	0.045868256	-2.7635	0.38015
Cluster-4389.1681	Cluster-4389.1681	Cluster-4389.1681;	0.339756491	0.045889033	3.7097	0.17538
Cluster-4389.1355	Cluster-4389.1355	Cluster-4389.1355;orf1	1.492875474	0.045898124	5.702	2.03E-12
Cluster-6785.0	Cluster-6785.0	Cluster-6785.0;orf1	-0.510489818	0.045913555	0.36982	0.86465
Cluster-4389.9031	Cluster-4389.9031	Cluster-4389.9031;orf1	1.036337345	0.046055993	0.62431	NA
Cluster-15419.0	Cluster-15419.0	Cluster-15419.0;orf1	0.612072577	0.046076236	-1.0909	0.31169
Cluster-9601.0	Cluster-9601.0	Cluster-9601.0;orf1	-1.833861386	0.046095379	-1.5546	0.61999
Cluster-14616.0	Cluster-14616.0	Cluster-14616.0;	0.250304809	0.046155313	-4.6768	0.15219
Cluster-4389.11975	Cluster-4389.11975	Cluster-4389.11975;orf2	-0.412172937	0.046234582	-1.6618	0.0189
Cluster-6332.0	Cluster-6332.0	Cluster-6332.0;orf1	0.319703742	0.046258775	-2.6315	0.12675
Cluster-4389.1680	Cluster-4389.1680	Cluster-4389.1680;orf2	0.308682937	0.046266101	1.1205	0.093509
Cluster-6477.0	Cluster-6477.0	Cluster-6477.0;orf1	1.444537892	0.046317698	6.3974	7.30E-07
Cluster-20190.0	Cluster-20190.0	Cluster-20190.0;	0.515788952	0.046364507	0.59415	0.36898
Cluster-5614.0	Cluster-5614.0	Cluster-5614.0;orf1	0.836371107	0.046434704	6.7793	9.83E-06
Cluster-7699.0	Cluster-7699.0	Cluster-7699.0;	-0.272053205	0.04653047	1.0028	0.54704
Cluster-14977.0	Cluster-14977.0	Cluster-14977.0;	0.096687405	0.046556874	-0.88623	0.72317
Cluster-10007.0	Cluster-10007.0	Cluster-10007.0;orf1	0.285071329	0.046599577	-2.0302	0.61103
Cluster-8850.0	Cluster-8850.0	Cluster-8850.0;orf1	-0.604457239	0.046629091	-3.3273	0.36345
Cluster-16548.0	Cluster-16548.0	Cluster-16548.0;orf1	0.263897015	0.046650954	0.75468	0.36909
Cluster-4389.2291	Cluster-4389.2291	Cluster-4389.2291;orf1	1.19798524	0.046669052	4.501	0.0054215
Cluster-8617.0	Cluster-8617.0	Cluster-8617.0;orf1	-0.86207375	0.04672646	-2.6413	0.45541
Cluster-18443.0	Cluster-18443.0	Cluster-18443.0;orf1	0.169538543	0.046746571	0.09825	0.89728
Cluster-18273.0	Cluster-18273.0	Cluster-18273.0;orf1	-0.511789976	0.04674927	-1.8381	0.068309
Cluster-21754.0	Cluster-21754.0	Cluster-21754.0;orf1	-0.696522198	0.046787634	-2.3467	0.0050227
Cluster-15253.0	Cluster-15253.0	Cluster-15253.0;orf1	-0.640267752	0.046788244	-1.3568	0.3378
Cluster-4389.2891	Cluster-4389.2891	Cluster-4389.2891;orf1	0.220040543	0.046789434	1.2943	0.061821
Cluster-18156.0	Cluster-18156.0	Cluster-18156.0;orf1	0.310600089	0.046795558	-0.85887	0.26822
Cluster-14863.0	Cluster-14863.0	Cluster-14863.0;	0.597305081	0.046904907	-2.6091	0.41905
Cluster-4389.16924	Cluster-4389.16924	Cluster-4389.16924;orf1	1.454702328	0.046913809	5.0958	0.0073435
Cluster-4389.11206	Cluster-4389.11206	Cluster-4389.11206;orf1	-0.262611875	0.046958203	1.2838	0.34958
Cluster-4389.6481	Cluster-4389.6481	Cluster-4389.6481;orf1	0.66043199	0.047008462	5.0281	0.00015663
Cluster-4389.9879	Cluster-4389.9879	Cluster-4389.9879;orf1	-0.718785578	0.047013792	-2.2149	0.26281
Cluster-16711.0	Cluster-16711.0	Cluster-16711.0;orf1	-0.233515122	0.04703861	-0.4818	0.63889
Cluster-7808.0	Cluster-7808.0	Cluster-7808.0;orf1	0.573573583	0.0470735	2.3623	0.060875
Cluster-15974.0	Cluster-15974.0	Cluster-15974.0;orf1	0.210619605	0.047096241	0.356	0.65006
Cluster-15752.0	Cluster-15752.0	Cluster-15752.0;orf1	0.388659273	0.047194265	-0.2455	0.71367
Cluster-19608.0	Cluster-19608.0	Cluster-19608.0;orf1	-1.907215714	0.047204898	-2.8593	0.0072129
Cluster-10537.0	Cluster-10537.0	Cluster-10537.0;	-0.914100179	0.047261651	-6.3919	0.038635
Cluster-12935.0	Cluster-12935.0	Cluster-12935.0;orf1	0.208466809	0.047360659	-0.61532	0.71426
Cluster-4389.7355	Cluster-4389.7355	Cluster-4389.7355;orf1	0.28626311	0.047393944	0.41611	0.64913
Cluster-4389.12144	Cluster-4389.12144	Cluster-4389.12144;orf1	1.301825232	0.047429814	6.7557	1.40E-12
Cluster-4389.11555	Cluster-4389.11555	Cluster-4389.11555;orf1	0.300281521	0.047464098	0.37372	0.72498
Cluster-4389.6619	Cluster-4389.6619	Cluster-4389.6619;orf1	0.294512089	0.047479614	0.86385	0.20763
Cluster-11700.0	Cluster-11700.0	Cluster-11700.0;orf1	0.505118314	0.047504701	3.0422	0.0025359
Cluster-13225.2	Cluster-13225.2	Cluster-13225.2;orf1	0.239207656	0.047562951	-1.4353	0.71769
Cluster-11330.0	Cluster-11330.0	Cluster-11330.0;orf1	0.938086701	0.047565901	3.3168	0.002785
Cluster-4389.3643	Cluster-4389.3643	Cluster-4389.3643;orf1	0.531457318	0.04760623	1.0987	0.2222
Cluster-4389.14221	Cluster-4389.14221	Cluster-4389.14221;	-0.379933698	0.047740349	-0.89912	0.81411
Cluster-19247.0	Cluster-19247.0	Cluster-19247.0;orf1	-0.17573322	0.047778448	0.23523	0.84075
Cluster-4389.3123	Cluster-4389.3123	Cluster-4389.3123;orf1	-0.551202361	0.047838743	-5.2081	3.18E-09
Cluster-4389.1250	Cluster-4389.1250	Cluster-4389.1250;orf1	0.682612748	0.047887256	1.828	0.029282
Cluster-4389.11945	Cluster-4389.11945	Cluster-4389.11945;orf1	0.759873668	0.047905159	3.8869	5.85E-08
Cluster-17711.0	Cluster-17711.0	Cluster-17711.0;orf1	-0.332898662	0.047928735	0.11415	0.87488
Cluster-4389.11520	Cluster-4389.11520	Cluster-4389.11520;orf1	-0.235027713	0.047948929	-1.1031	0.11568
Cluster-21436.0	Cluster-21436.0	Cluster-21436.0;orf1	1.069455453	0.047971503	3.861	1.37E-05
Cluster-4389.2631	Cluster-4389.2631	Cluster-4389.2631;orf1	0.30176513	0.048033441	-0.02635	0.96474
Cluster-4389.6263	Cluster-4389.6263	Cluster-4389.6263;orf1	0.571969289	0.048033584	-0.84739	0.23601
Cluster-4389.16884	Cluster-4389.16884	Cluster-4389.16884;orf1	1.842322622	0.048039557	4.5773	2.38E-10
Cluster-17029.0	Cluster-17029.0	Cluster-17029.0;orf1	0.344580813	0.048092353	0.95276	0.31493
Cluster-4389.6650	Cluster-4389.6650	Cluster-4389.6650;orf1	0.995822057	0.048122901	1.8247	0.0038573
Cluster-15857.0	Cluster-15857.0	Cluster-15857.0;	0.920524664	0.048408452	-2.0416	0.21839
Cluster-15819.0	Cluster-15819.0	Cluster-15819.0;orf1	-1.031342539	0.048457381	-2.0972	0.10949
Cluster-12035.0	Cluster-12035.0	Cluster-12035.0;orf1	0.939643812	0.048498845	-0.26632	0.93959
Cluster-323.0	Cluster-323.0	Cluster-323.0;orf1	-0.845309217	0.048508626	0.97021	0.80621
Cluster-4389.13667	Cluster-4389.13667	Cluster-4389.13667;orf1	0.756568401	0.04853412	1.9879	0.099773
Cluster-4389.5811	Cluster-4389.5811	Cluster-4389.5811;orf1	1.743301035	0.048539859	10.443	5.87E-13
Cluster-14582.0	Cluster-14582.0	Cluster-14582.0;orf1	0.342105977	0.048600316	0.51743	0.81887
Cluster-4389.3407	Cluster-4389.3407	Cluster-4389.3407;orf1	0.38564566	0.048625709	0.77045	0.2986
Cluster-4389.3036	Cluster-4389.3036	Cluster-4389.3036;orf1	-0.063849426	0.048648021	-0.55615	0.47148
Cluster-4389.12396	Cluster-4389.12396	Cluster-4389.12396;orf1	-0.336052638	0.048660415	-3.863	0.022659
Cluster-4389.2818	Cluster-4389.2818	Cluster-4389.2818;orf1	0.566863719	0.04868052	0.94003	0.16315
Cluster-4389.11670	Cluster-4389.11670	Cluster-4389.11670;	0.517028329	0.048697037	1.4168	0.71931
Cluster-4389.15335	Cluster-4389.15335	Cluster-4389.15335;orf1	-0.287038113	0.048763545	0.59936	0.46135
Cluster-4389.6220	Cluster-4389.6220	Cluster-4389.6220;orf1	0.97772931	0.048791752	5.6176	9.42E-10
Cluster-4389.245	Cluster-4389.245	Cluster-4389.245;orf1	0.328831562	0.048796472	0.416	0.80279
Cluster-4389.3791	Cluster-4389.3791	Cluster-4389.3791;orf1	1.311310643	0.048980117	4.1336	8.86E-05
Cluster-4389.13779	Cluster-4389.13779	Cluster-4389.13779;orf1	-0.146529149	0.049007582	0.83152	0.18105
Cluster-8312.0	Cluster-8312.0	Cluster-8312.0;orf2	0.407910082	0.049048318	-1.28	0.62134
Cluster-17406.0	Cluster-17406.0	Cluster-17406.0;orf1	-0.279671862	0.049199723	-0.74614	0.52995
Cluster-11774.0	Cluster-11774.0	Cluster-11774.0;	-0.402313756	0.049215139	-0.18978	0.95098
Cluster-5987.0	Cluster-5987.0	Cluster-5987.0;orf1	0.391069534	0.0492719	-2.5949	0.31511
Cluster-3348.0	Cluster-3348.0	Cluster-3348.0;orf1	0.464380099	0.049311529	1.9824	0.61404
Cluster-17408.0	Cluster-17408.0	Cluster-17408.0;orf1	-0.803904887	0.049551493	-0.90398	0.42481
Cluster-4389.14242	Cluster-4389.14242	Cluster-4389.14242;orf1	0.793179526	0.049597685	3.1254	0.00089275
Cluster-16579.0	Cluster-16579.0	Cluster-16579.0;orf1	0.343647997	0.049809166	-0.64161	0.61398
Cluster-14761.0	Cluster-14761.0	Cluster-14761.0;orf1	0.263393162	0.049846983	-0.65275	0.73889
Cluster-4389.15394	Cluster-4389.15394	Cluster-4389.15394;orf1	-0.277197604	0.049928055	-2.4489	0.026044
Cluster-4389.14001	Cluster-4389.14001	Cluster-4389.14001;orf1	1.367879423	0.050007816	8.3585	4.47E-08
Cluster-4389.8534	Cluster-4389.8534	Cluster-4389.8534;orf1	1.019113932	0.050037665	2.2248	0.0005348
Cluster-7802.1	Cluster-7802.1	Cluster-7802.1;	-0.158985238	0.050077751	-1.123	0.77648
Cluster-8977.0	Cluster-8977.0	Cluster-8977.0;orf1	0.94298535	0.050111027	-2.7011	0.1389
Cluster-4389.11904	Cluster-4389.11904	Cluster-4389.11904;orf1	0.953880942	0.050192558	6.1489	0.00017271
Cluster-7502.1	Cluster-7502.1	Cluster-7502.1;orf1	0.895851212	0.050258799	0.68111	0.86362
Cluster-4389.10226	Cluster-4389.10226	Cluster-4389.10226;orf1	0.310729992	0.050359433	1.6234	0.05785
Cluster-4389.4397	Cluster-4389.4397	Cluster-4389.4397;orf1	0.709044166	0.050465148	9.5238	1.94E-11
Cluster-7474.0	Cluster-7474.0	Cluster-7474.0;orf1	1.822285386	0.050627253	3.5676	0.00032793
Cluster-4389.16432	Cluster-4389.16432	Cluster-4389.16432;orf1	0.555406386	0.050674638	0.5296	0.58725
Cluster-4389.15477	Cluster-4389.15477	Cluster-4389.15477;orf1	0.284305574	0.050694698	0.68147	0.41946
Cluster-4389.2418	Cluster-4389.2418	Cluster-4389.2418;orf1	0.709021554	0.050700318	1.8343	0.0070065
Cluster-4389.5336	Cluster-4389.5336	Cluster-4389.5336;orf1	0.467752316	0.050759391	0.28939	0.82199
Cluster-15153.0	Cluster-15153.0	Cluster-15153.0;orf1	0.272938383	0.05077347	2.3045	0.029711
Cluster-4719.0	Cluster-4719.0	Cluster-4719.0;	1.303767619	0.050788204	3.1237	0.30587
Cluster-21114.0	Cluster-21114.0	Cluster-21114.0;orf1	-0.447109008	0.050934856	-0.069128	0.94187
Cluster-4389.12436	Cluster-4389.12436	Cluster-4389.12436;orf1	0.695130629	0.050956559	2.9338	2.52E-05
Cluster-4389.9494	Cluster-4389.9494	Cluster-4389.9494;orf1	0.847022058	0.050992251	3.8928	1.04E-06
Cluster-4389.3837	Cluster-4389.3837	Cluster-4389.3837;orf1	0.516796314	0.050993739	0.063067	0.94268
Cluster-18131.0	Cluster-18131.0	Cluster-18131.0;orf1	-0.370307175	0.051086167	-2.6557	0.0019337
Cluster-4389.4285	Cluster-4389.4285	Cluster-4389.4285;orf1	1.66302286	0.051180251	2.1726	0.00034865
Cluster-4389.14783	Cluster-4389.14783	Cluster-4389.14783;orf1	0.427810348	0.051277714	1.1681	0.4159
Cluster-4389.5451	Cluster-4389.5451	Cluster-4389.5451;orf1	-0.287965199	0.051350112	0.50211	0.50312
Cluster-4389.1162	Cluster-4389.1162	Cluster-4389.1162;orf1	-0.967092142	0.051389957	-0.90076	0.3835
Cluster-4389.12759	Cluster-4389.12759	Cluster-4389.12759;orf1	0.271628671	0.051408637	0.095817	0.90443
Cluster-20437.0	Cluster-20437.0	Cluster-20437.0;orf1	-0.446227564	0.051414204	-0.22282	0.80112
Cluster-4389.3663	Cluster-4389.3663	Cluster-4389.3663;orf1	0.734416463	0.051419044	1.2429	0.21127
Cluster-21102.0	Cluster-21102.0	Cluster-21102.0;orf1	0.402134052	0.051424647	1.0955	0.29437
Cluster-4389.975	Cluster-4389.975	Cluster-4389.975;orf1	-0.354684832	0.051437129	-0.16218	0.84287
Cluster-21271.0	Cluster-21271.0	Cluster-21271.0;orf1	0.682155472	0.051569521	0.59943	0.60108
Cluster-4389.8057	Cluster-4389.8057	Cluster-4389.8057;orf1	1.40132239	0.051626599	1.5216	0.062885
Cluster-4389.7963	Cluster-4389.7963	Cluster-4389.7963;orf1	-0.549074555	0.051747719	0.44513	0.46953
Cluster-4389.6120	Cluster-4389.6120	Cluster-4389.6120;orf1	-0.501561685	0.051797278	-0.36616	0.7592
Cluster-19178.0	Cluster-19178.0	Cluster-19178.0;orf1	1.20358917	0.052045622	2.5724	0.01371
Cluster-4389.7606	Cluster-4389.7606	Cluster-4389.7606;orf1	0.740197035	0.052073338	0.56842	0.3624
Cluster-6781.0	Cluster-6781.0	Cluster-6781.0;orf1	-0.3009226	0.052088003	-0.55254	0.8379
Cluster-4389.16712	Cluster-4389.16712	Cluster-4389.16712;orf1	0.706293644	0.052098297	1.9815	0.03752
Cluster-1851.0	Cluster-1851.0	Cluster-1851.0;	-0.398331411	0.052187919	1.7851	0.65004
Cluster-7534.0	Cluster-7534.0	Cluster-7534.0;orf1	-0.401098308	0.052194695	-2.7856	0.44066
Cluster-12716.0	Cluster-12716.0	Cluster-12716.0;	0.401041641	0.052378354	0.57866	0.85458
Cluster-4389.4798	Cluster-4389.4798	Cluster-4389.4798;orf1	0.861922585	0.052394564	3.3364	0.0025805
Cluster-18501.0	Cluster-18501.0	Cluster-18501.0;	-0.877771475	0.052404933	-6.4378	0.013717
Cluster-4389.3446	Cluster-4389.3446	Cluster-4389.3446;orf1	1.211504105	0.05246726	0.33329	0.71687
Cluster-4389.10757	Cluster-4389.10757	Cluster-4389.10757;orf2	0.425641392	0.052467498	-1.8293	0.071474
Cluster-8911.0	Cluster-8911.0	Cluster-8911.0;orf1	0.406478596	0.052509061	-0.61423	0.83403
Cluster-5787.0	Cluster-5787.0	Cluster-5787.0;orf1	-1.01330002	0.052520453	2.411	0.22956
Cluster-4389.15470	Cluster-4389.15470	Cluster-4389.15470;orf1	-0.321532099	0.052580731	-2.1485	0.076065
Cluster-17391.0	Cluster-17391.0	Cluster-17391.0;orf1	-0.6030803	0.052587783	0.20784	0.82658
Cluster-13116.0	Cluster-13116.0	Cluster-13116.0;orf1	0.425713617	0.05259428	3.1435	0.0039011
Cluster-6702.0	Cluster-6702.0	Cluster-6702.0;orf1	0.963701185	0.052645558	-0.63156	0.70918
Cluster-4389.5845	Cluster-4389.5845	Cluster-4389.5845;orf1	-0.570946489	0.052674154	-0.24185	0.73407
Cluster-4389.12894	Cluster-4389.12894	Cluster-4389.12894;orf2	0.639611526	0.052832446	1.1716	0.10378
Cluster-4389.11986	Cluster-4389.11986	Cluster-4389.11986;orf1	0.878466255	0.052859904	4.5491	1.58E-06
Cluster-19025.0	Cluster-19025.0	Cluster-19025.0;orf1	1.158327298	0.053015157	2.7629	0.00069629
Cluster-22102.0	Cluster-22102.0	Cluster-22102.0;orf1	-0.534327648	0.053034131	-1.0408	0.46197
Cluster-4389.90	Cluster-4389.90	Cluster-4389.90;orf1	-0.352027702	0.053059336	1.185	0.53139
Cluster-4389.9835	Cluster-4389.9835	Cluster-4389.9835;orf2	0.503358816	0.053124164	0.49482	0.49113
Cluster-16781.0	Cluster-16781.0	Cluster-16781.0;orf1	-0.413294061	0.053192287	0.49413	0.74986
Cluster-21592.0	Cluster-21592.0	Cluster-21592.0;	-0.565404051	0.053299159	-4.2543	0.036971
Cluster-4389.2297	Cluster-4389.2297	Cluster-4389.2297;	0.275759925	0.053309165	0.44522	0.57067
Cluster-4389.11764	Cluster-4389.11764	Cluster-4389.11764;orf2	0.21468741	0.053351937	-0.33808	0.68003
Cluster-10531.0	Cluster-10531.0	Cluster-10531.0;	0.840158171	0.053380135	3.1427	0.2251
Cluster-14807.0	Cluster-14807.0	Cluster-14807.0;orf1	2.307002577	0.053383313	-4.5112	0.1829
Cluster-4389.5204	Cluster-4389.5204	Cluster-4389.5204;orf1	-0.798219745	0.053415295	-0.9407	0.48255
Cluster-15938.0	Cluster-15938.0	Cluster-15938.0;orf1	0.460698463	0.053417179	2.161	0.0086093
Cluster-4389.3804	Cluster-4389.3804	Cluster-4389.3804;orf1	1.306998044	0.053468039	7.4293	1.41E-16
Cluster-4389.729	Cluster-4389.729	Cluster-4389.729;orf1	1.419807723	0.053481517	2.7685	0.0003988
Cluster-4572.0	Cluster-4572.0	Cluster-4572.0;	-0.574055892	0.053528877	3.1902	0.22483
Cluster-4389.12938	Cluster-4389.12938	Cluster-4389.12938;orf1	0.252695407	0.053547907	0.8829	0.40141
Cluster-17359.0	Cluster-17359.0	Cluster-17359.0;orf1	-0.734231025	0.053635013	-1.7559	0.026634
Cluster-17315.0	Cluster-17315.0	Cluster-17315.0;orf1	-1.480162306	0.053689094	-3.6938	0.0020027
Cluster-4389.976	Cluster-4389.976	Cluster-4389.976;orf1	-0.321089075	0.053698768	0.2598	0.84073
Cluster-4389.7961	Cluster-4389.7961	Cluster-4389.7961;orf1	0.550589839	0.053742351	0.82474	0.33874
Cluster-2411.1	Cluster-2411.1	Cluster-2411.1;	0.765078801	0.05386589	3.5192	0.15674
Cluster-4389.7619	Cluster-4389.7619	Cluster-4389.7619;orf1	0.225409954	0.053924034	1.171	0.12653
Cluster-18893.0	Cluster-18893.0	Cluster-18893.0;orf1	1.549430626	0.053941182	1.1278	0.22117
Cluster-21341.0	Cluster-21341.0	Cluster-21341.0;orf1	0.28173071	0.054075779	-1.4393	0.44085
Cluster-17042.0	Cluster-17042.0	Cluster-17042.0;orf1	-0.590701604	0.054088019	-0.09776	0.91834
Cluster-6355.0	Cluster-6355.0	Cluster-6355.0;orf1	-0.704857848	0.054281308	-1.7966	0.65187
Cluster-4389.355	Cluster-4389.355	Cluster-4389.355;orf1	0.194629866	0.054290986	0.77147	0.49783
Cluster-4389.10063	Cluster-4389.10063	Cluster-4389.10063;orf1	-0.333271855	0.054379946	-0.12053	0.90774
Cluster-18380.0	Cluster-18380.0	Cluster-18380.0;orf1	-0.330400698	0.054385277	-1.0793	0.13022
Cluster-9937.1	Cluster-9937.1	Cluster-9937.1;orf1	-0.588767558	0.05438627	-6.1182	0.0049902
Cluster-4389.10762	Cluster-4389.10762	Cluster-4389.10762;orf1	0.454066032	0.054447688	2.1958	0.085921
Cluster-18486.0	Cluster-18486.0	Cluster-18486.0;orf1	0.224740203	0.05449143	-0.63548	0.42497
Cluster-4389.16202	Cluster-4389.16202	Cluster-4389.16202;orf1	-0.357650017	0.054491936	0.52831	0.75702
Cluster-19664.0	Cluster-19664.0	Cluster-19664.0;orf1	1.454965782	0.054510477	0.57222	0.35978
Cluster-13155.0	Cluster-13155.0	Cluster-13155.0;orf1	-0.752693526	0.054549288	-2.4037	0.34339
Cluster-19245.0	Cluster-19245.0	Cluster-19245.0;	-1.13054173	0.054595644	-3.2922	0.26099
Cluster-18269.0	Cluster-18269.0	Cluster-18269.0;orf1	0.189746442	0.054638502	2.7286	0.41582
Cluster-20709.0	Cluster-20709.0	Cluster-20709.0;orf1	-0.341975353	0.054719017	-3.5578	0.030493
Cluster-4389.6192	Cluster-4389.6192	Cluster-4389.6192;orf1	0.54425829	0.054749647	6.3137	4.11E-11
Cluster-13268.0	Cluster-13268.0	Cluster-13268.0;	-1.069397676	0.054773582	-3.1808	0.33423
Cluster-4389.4520	Cluster-4389.4520	Cluster-4389.4520;orf1	-1.083721826	0.054825285	-0.63796	0.47423
Cluster-4389.3869	Cluster-4389.3869	Cluster-4389.3869;orf1	0.290069888	0.054829311	0.035458	0.95741
Cluster-20356.0	Cluster-20356.0	Cluster-20356.0;orf1	0.212625169	0.054890066	-0.7975	0.32833
Cluster-7772.0	Cluster-7772.0	Cluster-7772.0;	-0.911107213	0.055010875	-2.5538	0.25675
Cluster-4389.14218	Cluster-4389.14218	Cluster-4389.14218;	0.562241568	0.055059491	0.77753	0.61482
Cluster-12349.0	Cluster-12349.0	Cluster-12349.0;orf1	0.251725632	0.055069031	-0.53688	0.82349
Cluster-4389.1390	Cluster-4389.1390	Cluster-4389.1390;orf1	0.827762689	0.055123401	0.77612	0.37106
Cluster-18231.0	Cluster-18231.0	Cluster-18231.0;orf1	-0.21564281	0.055127262	-0.31057	0.74842
Cluster-11321.0	Cluster-11321.0	Cluster-11321.0;	-0.512188915	0.055129849	5.1903	0.0022524
Cluster-19573.0	Cluster-19573.0	Cluster-19573.0;	-0.436368004	0.055209446	0.57999	0.88383
Cluster-4389.3188	Cluster-4389.3188	Cluster-4389.3188;	0.390131865	0.055346226	0.18009	0.91406
Cluster-4389.10027	Cluster-4389.10027	Cluster-4389.10027;orf1	-1.173360809	0.055347681	-3.4558	0.012707
Cluster-17784.0	Cluster-17784.0	Cluster-17784.0;orf1	-0.734161223	0.055354123	-0.26938	0.74726
Cluster-13866.0	Cluster-13866.0	Cluster-13866.0;	-0.456229187	0.055376252	0.049555	0.96738
Cluster-12524.0	Cluster-12524.0	Cluster-12524.0;orf1	1.58730231	0.055386078	0.29894	0.89863
Cluster-4389.11769	Cluster-4389.11769	Cluster-4389.11769;orf1	0.651523256	0.055396145	3.8176	0.00016572
Cluster-19463.0	Cluster-19463.0	Cluster-19463.0;orf1	1.372963776	0.055412649	1.5805	0.12012
Cluster-18627.0	Cluster-18627.0	Cluster-18627.0;orf1	0.611158076	0.055474913	1.5336	0.14094
Cluster-6891.0	Cluster-6891.0	Cluster-6891.0;	0.829319391	0.055560718	0.9412	0.64167
Cluster-4389.16427	Cluster-4389.16427	Cluster-4389.16427;orf1	-0.221556926	0.055563355	0.077079	0.92146
Cluster-4389.12171	Cluster-4389.12171	Cluster-4389.12171;	0.212605882	0.055563997	1.2755	0.19163
Cluster-4389.14979	Cluster-4389.14979	Cluster-4389.14979;orf1	0.239390156	0.055578334	-0.45624	0.62265
Cluster-4389.2628	Cluster-4389.2628	Cluster-4389.2628;orf1	0.417097434	0.055592023	-0.77302	0.52719
Cluster-7678.0	Cluster-7678.0	Cluster-7678.0;	0.460658535	0.055613553	1.2525	0.59557
Cluster-14889.0	Cluster-14889.0	Cluster-14889.0;orf1	-0.493696401	0.055737796	2.5702	0.45161
Cluster-4389.1735	Cluster-4389.1735	Cluster-4389.1735;orf1	0.369564733	0.055747755	1.1094	0.13908
Cluster-4389.13138	Cluster-4389.13138	Cluster-4389.13138;orf1	0.642941399	0.055770179	2.2058	0.56149
Cluster-4389.17062	Cluster-4389.17062	Cluster-4389.17062;orf1	0.330184106	0.055846802	-0.66782	0.53415
Cluster-16181.0	Cluster-16181.0	Cluster-16181.0;orf1	-0.767241203	0.055937022	-1.154	0.10226
Cluster-10895.0	Cluster-10895.0	Cluster-10895.0;	-0.753765325	0.055974906	-1.21	0.69581
Cluster-4389.12484	Cluster-4389.12484	Cluster-4389.12484;orf1	-0.260665931	0.055981263	0.42861	0.7369
Cluster-7497.0	Cluster-7497.0	Cluster-7497.0;	0.420616134	0.05599539	-1.2841	0.74603
Cluster-17619.0	Cluster-17619.0	Cluster-17619.0;orf1	-0.283040423	0.056012483	-0.24208	0.7559
Cluster-15977.0	Cluster-15977.0	Cluster-15977.0;orf1	-0.840938314	0.056079813	-0.59182	0.6955
Cluster-4389.12776	Cluster-4389.12776	Cluster-4389.12776;orf1	0.528837133	0.056105786	1.6676	0.0063053
Cluster-4389.12238	Cluster-4389.12238	Cluster-4389.12238;orf1	0.599323865	0.056170826	0.26971	0.70811
Cluster-4389.5628	Cluster-4389.5628	Cluster-4389.5628;orf1	0.583346051	0.056271208	1.1066	0.15105
Cluster-4389.10753	Cluster-4389.10753	Cluster-4389.10753;orf1	-0.570368512	0.056290309	1.8808	0.0018701
Cluster-4389.93	Cluster-4389.93	Cluster-4389.93;	0.767087662	0.056318759	7.2044	4.29E-06
Cluster-4389.12955	Cluster-4389.12955	Cluster-4389.12955;orf1	1.062389271	0.056354223	1.4217	0.1184
Cluster-4389.2619	Cluster-4389.2619	Cluster-4389.2619;orf1	0.87439183	0.056384039	1.6365	0.05818
Cluster-4389.4540	Cluster-4389.4540	Cluster-4389.4540;orf1	1.391200492	0.05638819	5.5429	0.0010292
Cluster-4389.9896	Cluster-4389.9896	Cluster-4389.9896;orf1	0.423271666	0.056452218	-1.1253	0.18923
Cluster-4389.12360	Cluster-4389.12360	Cluster-4389.12360;orf2	1.449783742	0.056621987	6.8845	4.48E-20
Cluster-21557.0	Cluster-21557.0	Cluster-21557.0;orf1	-0.277854234	0.056650184	0.093606	0.93619
Cluster-4389.11213	Cluster-4389.11213	Cluster-4389.11213;orf1	-0.224435114	0.056726612	0.98499	0.16387
Cluster-4389.5638	Cluster-4389.5638	Cluster-4389.5638;orf1	0.229518615	0.056939845	1.0228	0.32947
Cluster-20203.0	Cluster-20203.0	Cluster-20203.0;	-1.062941063	0.056999547	-0.91457	0.39536
Cluster-16740.1	Cluster-16740.1	Cluster-16740.1;orf1	-0.699960603	0.057044143	-4.6493	0.079653
Cluster-4389.4735	Cluster-4389.4735	Cluster-4389.4735;orf1	0.831322301	0.057158793	1.519	0.037951
Cluster-8187.0	Cluster-8187.0	Cluster-8187.0;orf1	0.996095546	0.057193171	2.1408	0.14439
Cluster-20131.1	Cluster-20131.1	Cluster-20131.1;orf1	-0.175861754	0.057225328	-1.2626	0.28447
Cluster-8615.0	Cluster-8615.0	Cluster-8615.0;	0.369626073	0.057241589	2.2431	0.46949
Cluster-3691.0	Cluster-3691.0	Cluster-3691.0;	1.546660153	0.057261088	2.9478	0.28501
Cluster-4389.12508	Cluster-4389.12508	Cluster-4389.12508;orf1	0.192793039	0.057270153	-1.2324	0.20385
Cluster-4389.13904	Cluster-4389.13904	Cluster-4389.13904;orf1	-0.325732443	0.057284945	3.4344	1.24E-05
Cluster-4389.5626	Cluster-4389.5626	Cluster-4389.5626;orf1	1.838489621	0.057329646	4.0078	7.62E-09
Cluster-4389.16584	Cluster-4389.16584	Cluster-4389.16584;orf1	1.011952295	0.057390276	1.9268	0.27169
Cluster-4389.262	Cluster-4389.262	Cluster-4389.262;orf1	-0.167392095	0.057424701	0.19868	0.82479
Cluster-4389.15662	Cluster-4389.15662	Cluster-4389.15662;orf1	-0.26051968	0.057443516	0.97307	0.18162
Cluster-4389.8554	Cluster-4389.8554	Cluster-4389.8554;orf1	-0.678540541	0.057575474	-3.37	0.00013819
Cluster-20093.0	Cluster-20093.0	Cluster-20093.0;orf1	0.315130674	0.057619878	0.85356	0.28645
Cluster-5621.0	Cluster-5621.0	Cluster-5621.0;orf1	-0.639849738	0.05777503	2.2617	0.53734
Cluster-4389.11909	Cluster-4389.11909	Cluster-4389.11909;orf1	-0.110446031	0.057801766	0.12688	0.87894
Cluster-12576.0	Cluster-12576.0	Cluster-12576.0;orf1	0.5671018	0.057819364	4.8399	1.27E-05
Cluster-16257.0	Cluster-16257.0	Cluster-16257.0;orf2	0.27943273	0.057908439	1.1067	0.20122
Cluster-18295.0	Cluster-18295.0	Cluster-18295.0;orf1	-0.481157287	0.057945734	0.029592	0.96075
Cluster-15688.0	Cluster-15688.0	Cluster-15688.0;orf1	-0.357028919	0.057950253	-0.20789	0.81366
Cluster-4389.1352	Cluster-4389.1352	Cluster-4389.1352;orf1	-0.537027084	0.057996461	-3.0414	3.49E-06
Cluster-19074.0	Cluster-19074.0	Cluster-19074.0;orf1	0.284523684	0.057997089	1.6636	0.093575
Cluster-4389.12340	Cluster-4389.12340	Cluster-4389.12340;orf1	-0.313881505	0.058128608	-0.0099113	0.98906
Cluster-4389.10045	Cluster-4389.10045	Cluster-4389.10045;orf1	0.918037946	0.058129137	4.6671	7.37E-10
Cluster-4389.14784	Cluster-4389.14784	Cluster-4389.14784;orf1	-0.358807346	0.058203932	4.7631	0.01064
Cluster-4389.11818	Cluster-4389.11818	Cluster-4389.11818;orf1	0.964157619	0.058309277	3.9598	3.99E-05
Cluster-18022.0	Cluster-18022.0	Cluster-18022.0;orf1	-0.448720626	0.058328542	0.10747	0.91167
Cluster-4389.4225	Cluster-4389.4225	Cluster-4389.4225;orf1	-0.651182187	0.058389527	0.8223	0.54825
Cluster-16316.0	Cluster-16316.0	Cluster-16316.0;orf1	0.401355552	0.058619086	1.9925	0.042295
Cluster-4181.0	Cluster-4181.0	Cluster-4181.0;orf1	0.49431487	0.058651135	1.7213	0.66186
Cluster-17250.0	Cluster-17250.0	Cluster-17250.0;orf1	1.479080228	0.058794138	1.4744	0.2174
Cluster-4389.12393	Cluster-4389.12393	Cluster-4389.12393;orf1	0.559809023	0.058859106	0.12945	0.89723
Cluster-4389.13401	Cluster-4389.13401	Cluster-4389.13401;orf1	1.706726114	0.058868698	4.0635	4.76E-05
Cluster-4154.0	Cluster-4154.0	Cluster-4154.0;	-1.428825622	0.058888997	2.3924	0.50559
Cluster-4389.604	Cluster-4389.604	Cluster-4389.604;orf1	0.539781572	0.05890577	0.10653	0.89715
Cluster-19920.0	Cluster-19920.0	Cluster-19920.0;orf1	0.611951349	0.058907919	2.1051	0.087121
Cluster-4389.1608	Cluster-4389.1608	Cluster-4389.1608;orf1	-0.214312826	0.05892384	1.8353	0.095646
Cluster-10594.0	Cluster-10594.0	Cluster-10594.0;orf1	0.400890926	0.058932446	1.714	0.66322
Cluster-12030.2	Cluster-12030.2	Cluster-12030.2;orf1	0.584021101	0.058967557	-2.6493	0.36255
Cluster-4389.15080	Cluster-4389.15080	Cluster-4389.15080;orf1	0.379375812	0.059011569	0.88429	0.27367
Cluster-4359.0	Cluster-4359.0	Cluster-4359.0;orf1	1.380664455	0.059028753	7.3761	8.30E-07
Cluster-4389.1268	Cluster-4389.1268	Cluster-4389.1268;orf1	0.307572802	0.059063277	-0.79846	0.36209
Cluster-4389.12602	Cluster-4389.12602	Cluster-4389.12602;orf1	0.280439933	0.059072812	-0.56343	0.35892
Cluster-4389.12896	Cluster-4389.12896	Cluster-4389.12896;orf1	0.356035247	0.059074719	-0.74505	0.39805
Cluster-17895.0	Cluster-17895.0	Cluster-17895.0;orf1	-0.226062877	0.059158834	0.27837	0.67269
Cluster-19399.0	Cluster-19399.0	Cluster-19399.0;orf1	-0.64132364	0.059194855	-0.53798	0.65245
Cluster-4389.8608	Cluster-4389.8608	Cluster-4389.8608;orf1	-0.680985839	0.059207633	-3.207	0.021607
Cluster-4389.11310	Cluster-4389.11310	Cluster-4389.11310;orf1	1.639151068	0.059304574	11.862	2.64E-17
Cluster-4389.2191	Cluster-4389.2191	Cluster-4389.2191;	-0.338089167	0.059365282	-0.99484	0.32154
Cluster-20805.0	Cluster-20805.0	Cluster-20805.0;orf1	0.423079453	0.059428599	1.263	0.18477
Cluster-18427.0	Cluster-18427.0	Cluster-18427.0;orf1	-0.537151021	0.059468908	-0.63403	0.67011
Cluster-4389.4597	Cluster-4389.4597	Cluster-4389.4597;	1.306398765	0.059489782	0.85779	0.55982
Cluster-4389.14006	Cluster-4389.14006	Cluster-4389.14006;orf1	0.255358556	0.059597633	1.1902	0.093249
Cluster-4389.10896	Cluster-4389.10896	Cluster-4389.10896;orf1	0.222162124	0.059718693	0.29434	0.66826
Cluster-4389.15360	Cluster-4389.15360	Cluster-4389.15360;orf1	-0.314316488	0.059722628	-0.38615	0.56329
Cluster-4389.3295	Cluster-4389.3295	Cluster-4389.3295;orf1	0.954631425	0.059789657	2.947	0.00073961
Cluster-4389.15269	Cluster-4389.15269	Cluster-4389.15269;	-0.322781421	0.059843531	0.55293	0.7337
Cluster-4389.11602	Cluster-4389.11602	Cluster-4389.11602;orf1	0.703071171	0.059949688	0.11453	0.87446
Cluster-16287.0	Cluster-16287.0	Cluster-16287.0;orf1	-0.362424279	0.060041333	-1.3335	0.22368
Cluster-9840.0	Cluster-9840.0	Cluster-9840.0;orf1	0.805992764	0.060348215	2.9085	0.0038988
Cluster-4389.13438	Cluster-4389.13438	Cluster-4389.13438;orf1	1.032580872	0.060422248	4.4986	4.38E-07
Cluster-9408.0	Cluster-9408.0	Cluster-9408.0;	-0.466867498	0.060430989	-1.6915	0.6651
Cluster-20150.0	Cluster-20150.0	Cluster-20150.0;	0.523327009	0.060441151	-3.0853	0.038494
Cluster-11406.0	Cluster-11406.0	Cluster-11406.0;orf1	-0.632330804	0.060484545	1.9633	0.31946
Cluster-4389.8620	Cluster-4389.8620	Cluster-4389.8620;orf1	0.292453317	0.060530092	0.067173	0.91213
Cluster-4389.15896	Cluster-4389.15896	Cluster-4389.15896;orf1	0.2108474	0.060558505	-1.2634	0.25117
Cluster-4389.3019	Cluster-4389.3019	Cluster-4389.3019;orf1	0.422157845	0.060614144	0.77851	0.2642
Cluster-18218.0	Cluster-18218.0	Cluster-18218.0;orf1	0.513153807	0.060633724	0.18899	0.82043
Cluster-7674.0	Cluster-7674.0	Cluster-7674.0;orf1	-1.393983032	0.06064294	0.86296	0.49713
Cluster-14057.0	Cluster-14057.0	Cluster-14057.0;orf1	1.506264063	0.060667639	4.8004	0.00015278
Cluster-15462.0	Cluster-15462.0	Cluster-15462.0;orf1	-1.097871996	0.060672115	-2.0583	0.003485
Cluster-4389.1693	Cluster-4389.1693	Cluster-4389.1693;orf1	-0.360680943	0.060742827	-0.61323	0.3818
Cluster-4389.12347	Cluster-4389.12347	Cluster-4389.12347;orf1	2.300103255	0.060758944	3.547	1.10E-06
Cluster-21111.0	Cluster-21111.0	Cluster-21111.0;orf1	-0.883822602	0.060774608	-0.90285	0.21676
Cluster-4389.4043	Cluster-4389.4043	Cluster-4389.4043;	1.493758102	0.060799935	-0.47538	0.82033
Cluster-16728.0	Cluster-16728.0	Cluster-16728.0;orf1	-0.434049468	0.060899671	0.45706	0.69792
Cluster-15489.0	Cluster-15489.0	Cluster-15489.0;orf1	0.274242502	0.060943771	-0.7382	0.26205
Cluster-4389.11742	Cluster-4389.11742	Cluster-4389.11742;orf1	-0.465489441	0.060949992	-1.4913	0.053181
Cluster-4389.11748	Cluster-4389.11748	Cluster-4389.11748;orf1	0.348653808	0.061019202	0.98167	0.22327
Cluster-5771.0	Cluster-5771.0	Cluster-5771.0;orf1	-0.496489769	0.061147931	-8.0875	0.0015767
Cluster-4389.16323	Cluster-4389.16323	Cluster-4389.16323;orf1	0.199020685	0.061174481	0.90921	0.33159
Cluster-21387.0	Cluster-21387.0	Cluster-21387.0;orf1	-0.759972914	0.061204872	-1.4094	0.049426
Cluster-11606.0	Cluster-11606.0	Cluster-11606.0;orf1	-0.570400782	0.061314528	-3.8601	0.27232
Cluster-17194.0	Cluster-17194.0	Cluster-17194.0;orf1	0.379842698	0.061323307	1.2071	0.11973
Cluster-12567.0	Cluster-12567.0	Cluster-12567.0;orf1	0.548417741	0.061368937	0.406	0.91266
Cluster-16260.0	Cluster-16260.0	Cluster-16260.0;	0.405049423	0.061561607	0.64076	0.78394
Cluster-4389.3976	Cluster-4389.3976	Cluster-4389.3976;orf1	1.138925721	0.061607833	7.5111	1.29E-11
Cluster-4389.8552	Cluster-4389.8552	Cluster-4389.8552;	0.964409515	0.061615216	2.0713	0.0055374
Cluster-4389.8350	Cluster-4389.8350	Cluster-4389.8350;	-1.112241415	0.061652819	-3.2965	0.00026928
Cluster-4389.15179	Cluster-4389.15179	Cluster-4389.15179;orf1	-0.325347615	0.061661945	1.1129	0.65397
Cluster-4389.12780	Cluster-4389.12780	Cluster-4389.12780;orf1	-0.319874968	0.061673973	-0.97917	0.2692
Cluster-4389.2039	Cluster-4389.2039	Cluster-4389.2039;orf1	0.701251561	0.061713741	3.2274	0.0040412
Cluster-6241.0	Cluster-6241.0	Cluster-6241.0;orf1	-1.098745545	0.061731465	-2.3923	0.17489
Cluster-14534.0	Cluster-14534.0	Cluster-14534.0;orf1	0.509325548	0.061747231	2.2897	NA
Cluster-4389.10691	Cluster-4389.10691	Cluster-4389.10691;orf1	0.308655142	0.061800847	0.92345	0.13296
Cluster-4389.2310	Cluster-4389.2310	Cluster-4389.2310;orf1	-0.296328029	0.061802663	0.47124	0.5567
Cluster-4389.13371	Cluster-4389.13371	Cluster-4389.13371;orf1	0.486458392	0.061826175	-0.79863	0.25515
Cluster-4157.0	Cluster-4157.0	Cluster-4157.0;	0.879255765	0.061917805	0.012584	0.99749
Cluster-5301.0	Cluster-5301.0	Cluster-5301.0;	1.034991894	0.061921309	0.89341	0.82139
Cluster-21033.0	Cluster-21033.0	Cluster-21033.0;	-0.483762841	0.061940443	-4.3705	0.00011378
Cluster-4389.11025	Cluster-4389.11025	Cluster-4389.11025;orf1	1.193214005	0.061942113	2.6964	0.0058581
Cluster-7211.0	Cluster-7211.0	Cluster-7211.0;orf1	-0.647814166	0.062045791	-4.2085	0.19603
Cluster-4389.8011	Cluster-4389.8011	Cluster-4389.8011;orf1	0.248891059	0.062052353	0.091583	0.93664
Cluster-4389.15687	Cluster-4389.15687	Cluster-4389.15687;orf1	-0.25768782	0.062099143	0.21186	0.78703
Cluster-4389.16409	Cluster-4389.16409	Cluster-4389.16409;orf2	0.687138438	0.062125962	4.4739	0.030747
Cluster-15327.0	Cluster-15327.0	Cluster-15327.0;orf1	-0.224122551	0.062164258	-0.52714	0.49151
Cluster-20839.0	Cluster-20839.0	Cluster-20839.0;orf1	-0.571588639	0.062183683	-0.99435	0.64565
Cluster-17183.0	Cluster-17183.0	Cluster-17183.0;orf1	-0.252933047	0.062212383	0.049803	0.96352
Cluster-21211.0	Cluster-21211.0	Cluster-21211.0;orf1	-0.508744282	0.062397695	-0.56756	0.69705
Cluster-19344.0	Cluster-19344.0	Cluster-19344.0;orf1	-0.26791766	0.062423127	-2.1957	0.45826
Cluster-4389.14007	Cluster-4389.14007	Cluster-4389.14007;orf1	-0.5650622	0.062425688	-0.71896	0.3177
Cluster-9621.0	Cluster-9621.0	Cluster-9621.0;orf1	-0.609038434	0.062461106	-1.1954	0.48266
Cluster-4389.15550	Cluster-4389.15550	Cluster-4389.15550;orf1	-1.12263323	0.062562057	-1.7448	0.015111
Cluster-4389.15594	Cluster-4389.15594	Cluster-4389.15594;orf1	0.169458542	0.06260392	-1.2127	0.23838
Cluster-4389.10200	Cluster-4389.10200	Cluster-4389.10200;orf1	-0.263509837	0.062725005	0.19581	0.78322
Cluster-4389.6679	Cluster-4389.6679	Cluster-4389.6679;orf1	-1.786615295	0.062851209	-10.585	4.37E-15
Cluster-4389.3874	Cluster-4389.3874	Cluster-4389.3874;orf1	0.599300822	0.062853827	0.8462	0.19198
Cluster-12979.0	Cluster-12979.0	Cluster-12979.0;	1.256651406	0.062873383	7.057	1.15E-07
Cluster-4389.14463	Cluster-4389.14463	Cluster-4389.14463;orf1	0.314863453	0.062949398	-0.24035	0.80238
Cluster-12367.0	Cluster-12367.0	Cluster-12367.0;	-0.684167622	0.063006425	-3.3756	0.15524
Cluster-11035.0	Cluster-11035.0	Cluster-11035.0;	-0.304630682	0.063012614	-1.656	0.4845
Cluster-11430.0	Cluster-11430.0	Cluster-11430.0;orf1	-0.336188788	0.063112095	0.00039572	0.99987
Cluster-4389.12650	Cluster-4389.12650	Cluster-4389.12650;orf1	1.109772311	0.063172475	3.4457	0.0011319
Cluster-4389.3960	Cluster-4389.3960	Cluster-4389.3960;	1.399824587	0.06317918	9.2457	5.31E-13
Cluster-10411.0	Cluster-10411.0	Cluster-10411.0;orf1	-0.410155871	0.063208665	-0.12328	0.94421
Cluster-15955.0	Cluster-15955.0	Cluster-15955.0;	0.414731227	0.063215235	1.4813	0.11502
Cluster-20369.0	Cluster-20369.0	Cluster-20369.0;orf1	-0.628815055	0.063223269	-1.5389	0.041856
Cluster-10965.0	Cluster-10965.0	Cluster-10965.0;	-1.021326519	0.063263567	-4.2485	0.19553
Cluster-4389.7762	Cluster-4389.7762	Cluster-4389.7762;orf1	0.750337658	0.063466684	2.7366	0.016239
Cluster-4389.16399	Cluster-4389.16399	Cluster-4389.16399;	0.843870149	0.063533039	4.7145	1.83E-05
Cluster-19843.0	Cluster-19843.0	Cluster-19843.0;orf1	-0.242022946	0.063601069	-1.0525	0.13608
Cluster-4389.6041	Cluster-4389.6041	Cluster-4389.6041;orf1	0.595026699	0.063719381	0.31504	0.63192
Cluster-21589.0	Cluster-21589.0	Cluster-21589.0;orf1	-0.231073302	0.063755752	0.4724	0.5239
Cluster-4389.11286	Cluster-4389.11286	Cluster-4389.11286;orf1	0.960265656	0.06380878	9.0384	2.71E-09
Cluster-4389.9358	Cluster-4389.9358	Cluster-4389.9358;orf1	0.682758666	0.063879834	0.73771	0.47605
Cluster-18777.0	Cluster-18777.0	Cluster-18777.0;orf2	0.358975203	0.063885551	-0.58086	0.42786
Cluster-4389.13824	Cluster-4389.13824	Cluster-4389.13824;orf1	0.341396968	0.063911205	0.15234	0.9011
Cluster-9058.0	Cluster-9058.0	Cluster-9058.0;	0.388144714	0.064023362	0.80634	0.83867
Cluster-11307.0	Cluster-11307.0	Cluster-11307.0;	1.201800972	0.064055108	2.3247	0.45839
Cluster-4389.13017	Cluster-4389.13017	Cluster-4389.13017;	0.75660275	0.06408267	7.8589	3.13E-10
Cluster-14777.0	Cluster-14777.0	Cluster-14777.0;	-0.338447041	0.064246108	-2.8003	0.4358
Cluster-3639.0	Cluster-3639.0	Cluster-3639.0;orf1	0.242319236	0.064289349	0.31841	0.93626
Cluster-4389.6067	Cluster-4389.6067	Cluster-4389.6067;orf1	-0.290808971	0.064348672	-0.36522	0.6502
Cluster-4389.12312	Cluster-4389.12312	Cluster-4389.12312;orf1	0.286982993	0.064506714	-0.30248	0.71136
Cluster-4389.13564	Cluster-4389.13564	Cluster-4389.13564;orf1	-0.86135983	0.064671148	1.5216	0.15302
Cluster-4389.3240	Cluster-4389.3240	Cluster-4389.3240;orf1	0.775546534	0.064763387	8.804	6.06E-10
Cluster-4389.13260	Cluster-4389.13260	Cluster-4389.13260;orf1	1.375947311	0.064889992	1.5993	0.15329
Cluster-4389.5835	Cluster-4389.5835	Cluster-4389.5835;orf1	0.491502466	0.065072848	0.88554	0.16334
Cluster-4389.5927	Cluster-4389.5927	Cluster-4389.5927;orf1	0.781785673	0.065120214	5.8722	3.92E-08
Cluster-20682.0	Cluster-20682.0	Cluster-20682.0;orf1	0.567801326	0.065138492	-0.22816	0.74384
Cluster-15563.0	Cluster-15563.0	Cluster-15563.0;orf1	1.50185465	0.065205445	5.2066	0.00090669
Cluster-4389.4620	Cluster-4389.4620	Cluster-4389.4620;orf1	0.648247042	0.06527185	6.8334	8.93E-10
Cluster-21131.0	Cluster-21131.0	Cluster-21131.0;	-0.152330137	0.065295963	-0.050105	0.97421
Cluster-5476.0	Cluster-5476.0	Cluster-5476.0;	-0.62300069	0.06552161	1.2445	0.75251
Cluster-19375.0	Cluster-19375.0	Cluster-19375.0;orf1	0.211700179	0.065554266	1.3465	0.21337
Cluster-4389.8421	Cluster-4389.8421	Cluster-4389.8421;orf1	-1.425611232	0.065591995	-0.72679	0.31631
Cluster-4389.1091	Cluster-4389.1091	Cluster-4389.1091;	0.825730059	0.065604352	0.32986	0.85513
Cluster-8956.0	Cluster-8956.0	Cluster-8956.0;orf1	-0.21641852	0.065669023	-0.091558	0.93573
Cluster-14877.1	Cluster-14877.1	Cluster-14877.1;orf1	-0.527717824	0.065731724	-0.26096	0.94729
Cluster-20593.0	Cluster-20593.0	Cluster-20593.0;orf1	-0.924463253	0.065731829	-2.1699	0.0018984
Cluster-4389.7599	Cluster-4389.7599	Cluster-4389.7599;orf1	0.379868496	0.065769295	-1.4417	0.36576
Cluster-4389.6460	Cluster-4389.6460	Cluster-4389.6460;orf1	1.605334133	0.065792957	2.8899	0.044255
Cluster-4389.7722	Cluster-4389.7722	Cluster-4389.7722;orf1	-0.690955314	0.065836586	-0.58246	0.46135
Cluster-15696.0	Cluster-15696.0	Cluster-15696.0;orf1	0.258485395	0.06588901	0.44299	0.51275
Cluster-20251.0	Cluster-20251.0	Cluster-20251.0;orf1	0.111123706	0.065905117	0.17089	0.84045
Cluster-4389.5184	Cluster-4389.5184	Cluster-4389.5184;orf1	2.41290375	0.06605386	0.98763	0.51749
Cluster-16004.0	Cluster-16004.0	Cluster-16004.0;orf1	-1.153728363	0.066088094	0.31424	0.74549
Cluster-4389.6434	Cluster-4389.6434	Cluster-4389.6434;orf1	1.304607185	0.066155017	1.8214	0.047031
Cluster-9352.0	Cluster-9352.0	Cluster-9352.0;	0.517554777	0.066180206	0.31806	0.90375
Cluster-10853.0	Cluster-10853.0	Cluster-10853.0;orf1	-0.97362048	0.066306359	-2.5322	0.34488
Cluster-4389.13964	Cluster-4389.13964	Cluster-4389.13964;orf1	0.263499355	0.066323246	2.0149	0.01158
Cluster-4389.11098	Cluster-4389.11098	Cluster-4389.11098;orf1	0.32818836	0.06635338	-0.017743	0.9888
Cluster-4389.13706	Cluster-4389.13706	Cluster-4389.13706;orf1	0.501350536	0.066405563	0.78303	0.23176
Cluster-16732.0	Cluster-16732.0	Cluster-16732.0;orf1	-0.290724683	0.066425331	0.37345	0.61455
Cluster-21988.0	Cluster-21988.0	Cluster-21988.0;orf1	-0.560268508	0.066562262	-1.1329	0.25517
Cluster-4389.11404	Cluster-4389.11404	Cluster-4389.11404;orf1	-0.113954542	0.066602252	2.5994	0.02455
Cluster-17135.0	Cluster-17135.0	Cluster-17135.0;	0.702713276	0.066647866	1.4428	0.17356
Cluster-5973.0	Cluster-5973.0	Cluster-5973.0;	0.246485059	0.066661347	2.1635	0.56764
Cluster-4389.2361	Cluster-4389.2361	Cluster-4389.2361;orf1	-1.058818173	0.066664753	-2.3881	0.44296
Cluster-20521.0	Cluster-20521.0	Cluster-20521.0;orf1	-0.930480015	0.066739116	-1.2362	0.57308
Cluster-13202.0	Cluster-13202.0	Cluster-13202.0;orf1	0.363877164	0.066752647	0.77967	0.66411
Cluster-4389.13535	Cluster-4389.13535	Cluster-4389.13535;orf1	-0.32635416	0.066796588	-0.11487	0.91706
Cluster-4389.14304	Cluster-4389.14304	Cluster-4389.14304;orf1	0.797115738	0.066825299	5.6425	1.52E-06
Cluster-16527.0	Cluster-16527.0	Cluster-16527.0;orf1	-0.617262993	0.066885519	-2.977	0.002066
Cluster-4389.4524	Cluster-4389.4524	Cluster-4389.4524;orf1	1.455324114	0.066942275	4.0108	0.0017724
Cluster-9732.0	Cluster-9732.0	Cluster-9732.0;	1.052763509	0.067003325	-8.6167	0.027776
Cluster-9637.0	Cluster-9637.0	Cluster-9637.0;orf1	0.687510639	0.067079751	1.2477	0.45351
Cluster-4389.219	Cluster-4389.219	Cluster-4389.219;orf1	-0.405988535	0.067144303	-0.40988	0.74342
Cluster-20725.0	Cluster-20725.0	Cluster-20725.0;orf1	-0.524564882	0.067180322	-1.7127	0.17016
Cluster-5064.0	Cluster-5064.0	Cluster-5064.0;	1.148416905	0.06732483	1.3964	0.71526
Cluster-4691.0	Cluster-4691.0	Cluster-4691.0;	1.398594875	0.067338351	-0.13868	0.97237
Cluster-4389.12066	Cluster-4389.12066	Cluster-4389.12066;orf1	0.301976464	0.067404761	0.96484	0.22162
Cluster-4389.5261	Cluster-4389.5261	Cluster-4389.5261;orf1	1.073626584	0.067593367	6.2801	1.06E-06
Cluster-13497.0	Cluster-13497.0	Cluster-13497.0;	-0.636532849	0.067668575	-3.9504	0.096606
Cluster-7336.0	Cluster-7336.0	Cluster-7336.0;	-0.96450594	0.067853444	-5.6385	0.11957
Cluster-18680.0	Cluster-18680.0	Cluster-18680.0;orf1	-0.305607428	0.067859251	0.98121	0.31952
Cluster-4389.4433	Cluster-4389.4433	Cluster-4389.4433;orf1	0.400651532	0.067966978	2.4525	0.035089
Cluster-16954.0	Cluster-16954.0	Cluster-16954.0;orf1	-0.263007262	0.068010495	-2.0435	0.0058124
Cluster-4389.4363	Cluster-4389.4363	Cluster-4389.4363;orf1	0.63831828	0.068027675	2.022	0.0060277
Cluster-16735.0	Cluster-16735.0	Cluster-16735.0;orf1	-0.399422365	0.068149445	-1.0787	0.20264
Cluster-4389.12530	Cluster-4389.12530	Cluster-4389.12530;orf1	1.435647032	0.068225924	4.7479	0.0029849
Cluster-20470.0	Cluster-20470.0	Cluster-20470.0;orf1	0.317785684	0.068419191	0.21812	0.82055
Cluster-5349.0	Cluster-5349.0	Cluster-5349.0;orf1	0.984599907	0.068447868	1.8699	0.58903
Cluster-8201.0	Cluster-8201.0	Cluster-8201.0;orf1	-0.490605376	0.0684636	-5.321	0.17321
Cluster-4389.11432	Cluster-4389.11432	Cluster-4389.11432;orf1	0.219056748	0.068535331	-0.75406	0.48836
Cluster-8810.0	Cluster-8810.0	Cluster-8810.0;	0.284216976	0.068572253	2.1608	0.13544
Cluster-4389.11874	Cluster-4389.11874	Cluster-4389.11874;orf1	1.795715542	0.068683397	3.1153	2.17E-06
Cluster-7390.0	Cluster-7390.0	Cluster-7390.0;orf1	0.262450268	0.068713167	-0.49706	0.84816
Cluster-4389.5784	Cluster-4389.5784	Cluster-4389.5784;orf1	-0.551254565	0.068796058	-0.2043	0.76549
Cluster-21953.0	Cluster-21953.0	Cluster-21953.0;orf1	-1.20839723	0.068876775	-1.6254	0.070035
Cluster-21368.0	Cluster-21368.0	Cluster-21368.0;orf1	0.400935969	0.068906549	0.70817	0.56749
Cluster-4389.3826	Cluster-4389.3826	Cluster-4389.3826;orf1	1.030692279	0.068946657	2.6363	0.071381
Cluster-4389.463	Cluster-4389.463	Cluster-4389.463;orf1	1.20485356	0.069088347	-1.1179	0.66845
Cluster-17009.0	Cluster-17009.0	Cluster-17009.0;orf1	-0.619311063	0.069227859	-2.7944	0.027093
Cluster-4389.8377	Cluster-4389.8377	Cluster-4389.8377;orf1	-0.65515426	0.069527431	-1.4994	0.037032
Cluster-4389.5618	Cluster-4389.5618	Cluster-4389.5618;orf1	1.629579742	0.069588064	3.8717	1.53E-05
Cluster-4389.16673	Cluster-4389.16673	Cluster-4389.16673;orf1	-0.272766135	0.06964515	0.27	0.81375
Cluster-21433.0	Cluster-21433.0	Cluster-21433.0;orf1	-1.747180296	0.069677949	-0.43361	0.8083
Cluster-4389.3763	Cluster-4389.3763	Cluster-4389.3763;orf1	0.313396236	0.069678774	0.75947	0.24525
Cluster-4389.462	Cluster-4389.462	Cluster-4389.462;orf1	1.231458789	0.069734725	1.6052	0.031812
Cluster-4389.5057	Cluster-4389.5057	Cluster-4389.5057;orf1	1.665710779	0.069750404	4.4962	9.68E-09
Cluster-20754.0	Cluster-20754.0	Cluster-20754.0;orf1	-0.283287773	0.069756497	-0.67687	0.45608
Cluster-20707.0	Cluster-20707.0	Cluster-20707.0;orf1	-1.09185087	0.069857733	-2.6512	0.0034456
Cluster-4389.5861	Cluster-4389.5861	Cluster-4389.5861;orf1	1.479070114	0.069924309	4.3643	0.00055203
Cluster-16308.0	Cluster-16308.0	Cluster-16308.0;orf1	0.303475332	0.069948294	-4.2378	0.00143
Cluster-4389.6013	Cluster-4389.6013	Cluster-4389.6013;orf1	-0.237458159	0.070009755	0.0094691	0.99107
Cluster-4389.13221	Cluster-4389.13221	Cluster-4389.13221;orf1	0.597578105	0.070063083	-0.67655	0.53675
Cluster-19716.0	Cluster-19716.0	Cluster-19716.0;orf1	-0.232928065	0.070132724	-2.4512	0.09694
Cluster-4389.2799	Cluster-4389.2799	Cluster-4389.2799;orf1	1.532166416	0.070193812	6.0832	7.24E-06
Cluster-13225.1	Cluster-13225.1	Cluster-13225.1;	-0.192615878	0.070320824	0.37628	0.68563
Cluster-4389.8669	Cluster-4389.8669	Cluster-4389.8669;orf1	0.41109463	0.070615774	-0.015624	0.98313
Cluster-7644.0	Cluster-7644.0	Cluster-7644.0;orf1	1.163581767	0.070634578	-0.025716	0.9833
Cluster-4389.10831	Cluster-4389.10831	Cluster-4389.10831;orf1	0.543587626	0.070683113	0.94662	0.26531
Cluster-7867.0	Cluster-7867.0	Cluster-7867.0;orf1	-0.852868734	0.070693017	-1.1533	0.77236
Cluster-19290.0	Cluster-19290.0	Cluster-19290.0;orf1	0.355295971	0.070760584	0.34948	0.67065
Cluster-4389.11024	Cluster-4389.11024	Cluster-4389.11024;orf1	1.280640336	0.070825777	4.9145	5.80E-11
Cluster-8216.0	Cluster-8216.0	Cluster-8216.0;orf1	0.61551715	0.070847805	0.21942	0.93487
Cluster-4389.12489	Cluster-4389.12489	Cluster-4389.12489;orf1	1.578015885	0.070852807	9.1494	3.49E-17
Cluster-4389.11184	Cluster-4389.11184	Cluster-4389.11184;orf1	0.837556122	0.070866173	4.9536	1.69E-05
Cluster-4389.11552	Cluster-4389.11552	Cluster-4389.11552;orf1	-0.793636411	0.07094585	-0.98044	0.31471
Cluster-10748.0	Cluster-10748.0	Cluster-10748.0;orf1	0.510006979	0.070959242	2.7274	0.41156
Cluster-21888.0	Cluster-21888.0	Cluster-21888.0;orf1	-0.175529421	0.070965082	-0.046444	0.96597
Cluster-15893.0	Cluster-15893.0	Cluster-15893.0;orf1	-0.846185406	0.070972154	-1.6801	0.091487
Cluster-8775.0	Cluster-8775.0	Cluster-8775.0;	-0.417885429	0.070996724	-2.209	0.26319
Cluster-4389.16425	Cluster-4389.16425	Cluster-4389.16425;	0.477026941	0.071148334	1.3513	0.73187
Cluster-4389.8596	Cluster-4389.8596	Cluster-4389.8596;orf1	-0.859821116	0.071182898	-0.84145	0.25195
Cluster-18841.0	Cluster-18841.0	Cluster-18841.0;orf1	-1.336338538	0.071216167	1.289	0.5291
Cluster-4389.12943	Cluster-4389.12943	Cluster-4389.12943;orf1	-0.469597272	0.071248761	3.1064	0.015039
Cluster-11579.0	Cluster-11579.0	Cluster-11579.0;	0.285434514	0.071508856	-2.004	0.61258
Cluster-1780.1	Cluster-1780.1	Cluster-1780.1;orf1	0.937422094	0.071511626	3.2356	9.51E-05
Cluster-4389.8682	Cluster-4389.8682	Cluster-4389.8682;orf1	-0.316600443	0.071565576	-0.54599	0.39053
Cluster-18897.0	Cluster-18897.0	Cluster-18897.0;orf1	0.367383687	0.071578678	1.2476	0.10027
Cluster-4389.16950	Cluster-4389.16950	Cluster-4389.16950;	-1.187532778	0.071632093	-0.74565	0.55114
Cluster-15640.1	Cluster-15640.1	Cluster-15640.1;orf1	0.601310495	0.071642456	-0.21128	0.80043
Cluster-19407.0	Cluster-19407.0	Cluster-19407.0;orf1	-0.634878693	0.071761013	-2.9042	0.075759
Cluster-20947.0	Cluster-20947.0	Cluster-20947.0;orf1	-1.490571303	0.071815878	0.61099	0.61824
Cluster-21905.0	Cluster-21905.0	Cluster-21905.0;orf1	-0.191928804	0.071827218	-3.2049	0.12935
Cluster-19800.1	Cluster-19800.1	Cluster-19800.1;orf1	-0.536785133	0.071852974	1.4956	0.5267
Cluster-986.1	Cluster-986.1	Cluster-986.1;orf1	1.64283849	0.071853	0.88008	0.76888
Cluster-4389.13766	Cluster-4389.13766	Cluster-4389.13766;orf1	0.383276546	0.071946528	1.6361	0.29602
Cluster-8768.0	Cluster-8768.0	Cluster-8768.0;orf1	0.321688358	0.071977849	2.6846	0.039313
Cluster-7247.0	Cluster-7247.0	Cluster-7247.0;orf1	-0.814747056	0.072196715	-0.16945	0.96098
Cluster-4389.5725	Cluster-4389.5725	Cluster-4389.5725;orf1	1.114538958	0.072237608	-0.072716	0.90155
Cluster-4389.4272	Cluster-4389.4272	Cluster-4389.4272;orf1	0.720711373	0.072286694	0.78307	0.46048
Cluster-4389.4568	Cluster-4389.4568	Cluster-4389.4568;orf1	1.345040967	0.072367694	4.9762	5.91E-09
Cluster-11682.0	Cluster-11682.0	Cluster-11682.0;orf1	0.693053427	0.07245461	5.4115	0.00018754
Cluster-4389.5558	Cluster-4389.5558	Cluster-4389.5558;orf1	0.459323289	0.072484142	2.3822	0.032087
Cluster-17740.0	Cluster-17740.0	Cluster-17740.0;orf1	-0.210726861	0.072486897	-7.9933	3.12E-05
Cluster-15429.0	Cluster-15429.0	Cluster-15429.0;orf1	0.190844266	0.072582374	1.0001	0.13651
Cluster-8812.0	Cluster-8812.0	Cluster-8812.0;orf1	-0.647428823	0.072597664	-3.5269	0.31134
Cluster-9769.1	Cluster-9769.1	Cluster-9769.1;orf1	-1.318657912	0.072603538	-2.0841	0.16992
Cluster-4389.11927	Cluster-4389.11927	Cluster-4389.11927;orf1	1.510138238	0.072607209	9.5534	2.83E-16
Cluster-3324.0	Cluster-3324.0	Cluster-3324.0;orf1	0.669069767	0.072608021	2.7373	0.32101
Cluster-11685.0	Cluster-11685.0	Cluster-11685.0;orf1	0.579938258	0.072617569	0.67411	0.79717
Cluster-4389.6837	Cluster-4389.6837	Cluster-4389.6837;orf1	-0.468945662	0.072625002	-4.7718	9.84E-06
Cluster-4389.199	Cluster-4389.199	Cluster-4389.199;orf1	-0.394005266	0.072688305	-2.0003	0.015647
Cluster-15490.0	Cluster-15490.0	Cluster-15490.0;orf1	1.26101634	0.072748522	5.2874	2.23E-08
Cluster-17161.0	Cluster-17161.0	Cluster-17161.0;orf1	-0.469745445	0.072903254	-0.88911	0.25132
Cluster-21873.0	Cluster-21873.0	Cluster-21873.0;orf1	-0.294972626	0.072909752	-0.96423	0.12904
Cluster-4389.13842	Cluster-4389.13842	Cluster-4389.13842;orf1	0.283334331	0.072918961	-0.65014	0.46922
Cluster-18230.0	Cluster-18230.0	Cluster-18230.0;orf1	1.496746176	0.072973449	5.177	2.38E-09
Cluster-3697.1	Cluster-3697.1	Cluster-3697.1;	1.793175786	0.073117707	0.17366	0.96527
Cluster-4389.367	Cluster-4389.367	Cluster-4389.367;orf1	-0.659010527	0.073145311	-1.8449	0.051405
Cluster-17080.0	Cluster-17080.0	Cluster-17080.0;orf1	-0.53960588	0.07315221	-0.45152	0.5113
Cluster-4389.11489	Cluster-4389.11489	Cluster-4389.11489;orf1	0.581135988	0.073294637	4.326	4.40E-05
Cluster-18944.0	Cluster-18944.0	Cluster-18944.0;orf1	0.312754574	0.07329534	-1.7003	0.38964
Cluster-4389.11590	Cluster-4389.11590	Cluster-4389.11590;orf1	2.101973136	0.073571258	10.16	4.61E-13
Cluster-4389.10077	Cluster-4389.10077	Cluster-4389.10077;orf1	0.343954688	0.073577122	0.97029	0.14297
Cluster-4389.11675	Cluster-4389.11675	Cluster-4389.11675;orf1	0.255095441	0.0736313	1.0533	0.36999
Cluster-4389.12148	Cluster-4389.12148	Cluster-4389.12148;orf1	2.061216335	0.073632378	11.193	2.10E-15
Cluster-12721.0	Cluster-12721.0	Cluster-12721.0;orf1	0.668982647	0.073646194	1.4431	0.20721
Cluster-16916.0	Cluster-16916.0	Cluster-16916.0;orf1	1.427642351	0.073800208	-1.8676	0.088112
Cluster-4389.2390	Cluster-4389.2390	Cluster-4389.2390;orf1	0.347988675	0.07382025	1.361	0.179
Cluster-4389.10673	Cluster-4389.10673	Cluster-4389.10673;orf1	0.968880724	0.073822575	-3.6231	0.063254
Cluster-652.0	Cluster-652.0	Cluster-652.0;	-1.423425285	0.073828591	0.31841	0.93626
Cluster-4389.1385	Cluster-4389.1385	Cluster-4389.1385;orf1	1.35451168	0.073856097	10.149	1.65E-12
Cluster-8548.0	Cluster-8548.0	Cluster-8548.0;orf1	0.71712996	0.07399676	0.49904	0.66248
Cluster-4389.15644	Cluster-4389.15644	Cluster-4389.15644;orf1	1.58390271	0.074044613	0.27293	0.87246
Cluster-4389.14096	Cluster-4389.14096	Cluster-4389.14096;orf1	0.392911053	0.074092156	0.022574	0.97694
Cluster-12561.0	Cluster-12561.0	Cluster-12561.0;	-0.599625818	0.074143096	-0.85758	0.7166
Cluster-4389.5888	Cluster-4389.5888	Cluster-4389.5888;orf1	0.21886969	0.074390053	0.66982	0.34841
Cluster-4389.3561	Cluster-4389.3561	Cluster-4389.3561;orf2	0.413945764	0.074423679	-0.25521	0.77338
Cluster-16618.1	Cluster-16618.1	Cluster-16618.1;orf1	0.47936219	0.074498818	-0.66217	0.74371
Cluster-18242.0	Cluster-18242.0	Cluster-18242.0;orf1	-0.570475987	0.074552115	-2.6602	0.0013435
Cluster-20814.0	Cluster-20814.0	Cluster-20814.0;orf1	-0.733519824	0.07461755	0.89882	0.28533
Cluster-21253.0	Cluster-21253.0	Cluster-21253.0;orf1	-0.72079278	0.074651636	1.1248	0.11939
Cluster-20564.0	Cluster-20564.0	Cluster-20564.0;	-0.196167961	0.074709034	0.48123	0.49931
Cluster-11428.0	Cluster-11428.0	Cluster-11428.0;orf1	-0.530830675	0.074737389	-2.517	0.42017
Cluster-17427.0	Cluster-17427.0	Cluster-17427.0;	-0.338041443	0.074846643	-0.85428	0.50789
Cluster-9302.0	Cluster-9302.0	Cluster-9302.0;orf1	1.054451818	0.074865304	5.1119	1.00E-05
Cluster-17278.0	Cluster-17278.0	Cluster-17278.0;orf1	0.491020646	0.074914432	0.37904	0.65587
Cluster-4389.4621	Cluster-4389.4621	Cluster-4389.4621;orf1	0.654220198	0.074921391	0.47509	0.71836
Cluster-15994.1	Cluster-15994.1	Cluster-15994.1;	-2.3894446	0.074996989	-3.5137	0.00016608
Cluster-14884.0	Cluster-14884.0	Cluster-14884.0;orf1	-1.096202925	0.075068756	-0.97825	0.80429
Cluster-4389.11153	Cluster-4389.11153	Cluster-4389.11153;orf1	1.73822674	0.075099725	7.2496	1.56E-15
Cluster-4389.5608	Cluster-4389.5608	Cluster-4389.5608;orf1	1.487668875	0.075102174	4.0508	5.27E-09
Cluster-22046.0	Cluster-22046.0	Cluster-22046.0;	0.36388231	0.075121396	1.3742	0.14681
Cluster-4389.4209	Cluster-4389.4209	Cluster-4389.4209;orf1	1.554432471	0.075165615	4.4811	8.34E-07
Cluster-18751.0	Cluster-18751.0	Cluster-18751.0;orf1	0.599159689	0.075238049	0.30625	0.67135
Cluster-4389.5749	Cluster-4389.5749	Cluster-4389.5749;orf1	-0.248688382	0.075363907	0.089865	0.90986
Cluster-4389.3453	Cluster-4389.3453	Cluster-4389.3453;orf1	1.431024519	0.075463745	1.2123	0.31744
Cluster-4389.10692	Cluster-4389.10692	Cluster-4389.10692;orf1	1.171251462	0.075477972	4.0466	0.0033005
Cluster-4389.11249	Cluster-4389.11249	Cluster-4389.11249;orf1	-2.337753062	0.075481661	-1.192	0.30966
Cluster-4389.10618	Cluster-4389.10618	Cluster-4389.10618;orf1	1.816475785	0.075541533	2.4378	0.012008
Cluster-12508.0	Cluster-12508.0	Cluster-12508.0;orf1	-0.391026352	0.075546141	0.57013	0.8858
Cluster-21849.0	Cluster-21849.0	Cluster-21849.0;orf1	-0.35050982	0.075622328	-1.3019	0.30001
Cluster-13597.0	Cluster-13597.0	Cluster-13597.0;orf1	0.990764609	0.075680845	-2.6591	0.38157
Cluster-4389.11031	Cluster-4389.11031	Cluster-4389.11031;orf1	0.420413441	0.075686881	-0.18437	0.84242
Cluster-18398.0	Cluster-18398.0	Cluster-18398.0;orf1	1.330693089	0.07571899	3.6837	5.59E-06
Cluster-4389.14371	Cluster-4389.14371	Cluster-4389.14371;orf1	0.859599548	0.075725176	4.2163	0.0035611
Cluster-4389.4061	Cluster-4389.4061	Cluster-4389.4061;orf1	0.186132728	0.075963677	-0.43163	0.52235
Cluster-4389.3807	Cluster-4389.3807	Cluster-4389.3807;	1.384879047	0.075970073	6.152	7.33E-06
Cluster-17032.0	Cluster-17032.0	Cluster-17032.0;	-1.010828413	0.07611183	-6.4012	0.001733
Cluster-4389.4776	Cluster-4389.4776	Cluster-4389.4776;orf1	0.606797837	0.076177014	1.054	0.22951
Cluster-4389.7576	Cluster-4389.7576	Cluster-4389.7576;orf1	-0.510230536	0.076180487	-1.1048	0.42406
Cluster-4389.50	Cluster-4389.50	Cluster-4389.50;	-0.340012122	0.076232227	-2.2743	0.011033
Cluster-18987.0	Cluster-18987.0	Cluster-18987.0;orf1	0.440572591	0.076233504	-0.064234	0.96275
Cluster-21000.0	Cluster-21000.0	Cluster-21000.0;orf1	-0.22139883	0.076389517	-0.80176	0.3499
Cluster-4389.10775	Cluster-4389.10775	Cluster-4389.10775;orf1	1.147775273	0.076424014	5.2879	1.10E-08
Cluster-4389.4042	Cluster-4389.4042	Cluster-4389.4042;orf1	1.13711578	0.076426501	1.7122	0.12581
Cluster-18367.0	Cluster-18367.0	Cluster-18367.0;orf1	-1.689327763	0.076447054	-1.0685	0.54429
Cluster-4389.16026	Cluster-4389.16026	Cluster-4389.16026;orf2	0.670191119	0.076481322	-0.083007	0.96104
Cluster-4389.2840	Cluster-4389.2840	Cluster-4389.2840;orf1	0.650438344	0.076556542	2.3178	0.0037204
Cluster-4691.1	Cluster-4691.1	Cluster-4691.1;	1.828713405	0.076569894	2.8738	0.28192
Cluster-7236.0	Cluster-7236.0	Cluster-7236.0;orf1	-0.182703518	0.076575489	1.379	0.56827
Cluster-16305.1	Cluster-16305.1	Cluster-16305.1;orf1	-0.374353329	0.076626129	-0.28729	0.85635
Cluster-11802.0	Cluster-11802.0	Cluster-11802.0;	-0.394848757	0.076769906	-0.30548	0.93926
Cluster-6033.1	Cluster-6033.1	Cluster-6033.1;orf1	0.441047061	0.076853826	0.91849	0.27581
Cluster-19160.0	Cluster-19160.0	Cluster-19160.0;orf1	0.206748561	0.076986553	1.7944	0.024907
Cluster-4389.907	Cluster-4389.907	Cluster-4389.907;orf1	1.420240156	0.077007635	4.3071	6.71E-07
Cluster-17174.0	Cluster-17174.0	Cluster-17174.0;orf1	1.388715535	0.077053541	3.1794	0.00028401
Cluster-4389.15562	Cluster-4389.15562	Cluster-4389.15562;orf1	1.776089477	0.077123063	3.6968	3.99E-05
Cluster-4389.12074	Cluster-4389.12074	Cluster-4389.12074;orf1	0.565346961	0.077153515	1.0496	0.29214
Cluster-4389.1426	Cluster-4389.1426	Cluster-4389.1426;orf1	-0.324926885	0.077234291	0.0092239	0.99266
Cluster-4389.13380	Cluster-4389.13380	Cluster-4389.13380;orf1	-0.292668646	0.077257904	-0.97888	0.48948
Cluster-4389.13752	Cluster-4389.13752	Cluster-4389.13752;orf1	-0.403773518	0.077269109	1	0.32767
Cluster-15720.0	Cluster-15720.0	Cluster-15720.0;orf1	-0.564152893	0.077456143	-0.55556	0.68445
Cluster-4389.1625	Cluster-4389.1625	Cluster-4389.1625;orf1	-0.747945254	0.077685069	-1.8901	0.030611
Cluster-19498.0	Cluster-19498.0	Cluster-19498.0;orf1	-0.774100288	0.077690489	-3.5323	0.0092633
[truncated: 5,005 more rows]
